# Supplementary material for: The Effects of Specific Gut Microbiota and Metabolites on IgA Nephropathy—Based on Mendelian Randomization and Clinical Validation
Source: MDPI journal article supplement (doi:10.3390/nu15102407), 2023-05-22
Supplement: s1 [file s1]

**Supplement Table S4. Inverse variance weighted analysis of the reverse causality between exposure and outcome.**

| <b>Exposure</b>  | <b>Outcome</b>           | <b><math>\beta</math> (95%CI)</b> | <b>p value</b> |
|------------------|--------------------------|-----------------------------------|----------------|
| <b>Class</b>     |                          |                                   |                |
| IgAN             | Actinobacteria           | 0.0002(-0.0008, 0.0012)           | 0.69           |
| <b>Family</b>    |                          |                                   |                |
| IgAN             | Erysipelotrichaceae      | 0.0002(-0.00075, 0.00118)         | 0.7            |
| <b>Genus</b>     |                          |                                   |                |
| IgAN             | Butyrivibrio             | -0.0007(-0.0024, 0.0023)          | 0.96           |
| IgAN             | Parabacteroides          | -0.0005(-0.00015, 0.00048)        | 0.93           |
| IgAN             | Ruminococcus             | 0.0003(-0.0007, 0.0012)           | 0.499          |
| IgAN             | Phascolarctobacterium    | -0.0005(-0.002, 0.0009)           | 0.42           |
| IgAN             | Lachnospira              | 0.0004(-0.0006, 0.0014)           | 0.44           |
| <b>Order</b>     |                          |                                   |                |
| IgAN             | Erysipelotrichales       | 0.0002(-0.00085, 0.0012)          | 0.7            |
| <b>Metabolic</b> |                          |                                   |                |
| IgAN             | Beta_hydroxybutyric acid | -0.003(-0.006, 0.002)             | 0.43           |

Abbreviations: IgAN: immunoglobulin A nephropathy
