# Supplementary material for: The Effects of Specific Gut Microbiota and Metabolites on IgA Nephropathy—Based on Mendelian Randomization and Clinical Validation
Source: MDPI journal article supplement (doi:10.3390/nu15102407), 2023-05-22
Supplement: s1 [file s1]

Supplement Table S3. Mendelian randomized outliers and level pleiotropy test of exposure and outcome

| Group             | Exposure                        | Outcome | Cochran's<br>Q-derived P<br>value | MR-PRESSO-Global-test-derived P value | MR-Egger intercept-derived<br>P value |
|-------------------|---------------------------------|---------|-----------------------------------|---------------------------------------|---------------------------------------|
| <i>Class</i>      | <i>Actinobacteria</i>           | IgAN    | 0.96                              | 0.95                                  | 0.79                                  |
| <i>Family</i>     | <i>Erysipelotrichaceae</i>      | IgAN    | 0.62                              | 0.63                                  | 0.79                                  |
| <i>Genus</i>      | <i>Lachnospira</i>              | IgAN    | 0.70                              | 0.74                                  | 0.89                                  |
|                   | <i>Parabacteroides</i>          | IgAN    | 0.74                              | 0.78                                  | 0.58                                  |
|                   | <i>Butyrivibrio</i>             | IgAN    | 0.55                              | 0.55                                  | 0.71                                  |
|                   | <i>Phascolarctobacterium</i>    | IgAN    | 0.85                              | 0.86                                  | 0.91                                  |
|                   | <i>Ruminococcus</i>             | IgAN    | 0.69                              | 0.70                                  | 0.37                                  |
| <i>Order</i>      | <i>Erysipelotrichales</i>       | IgAN    | 0.87                              | 0.83                                  | 0.42                                  |
| <i>Metabolite</i> | <i>Beta_hydroxybutyric acid</i> | IgAN    | 0.27                              | 0.32                                  | 0.73                                  |
