# Supplementary material for: The Effects of Specific Gut Microbiota and Metabolites on IgA Nephropathy—Based on Mendelian Randomization and Clinical Validation
Source: MDPI journal article supplement (doi:10.3390/nu15102407), 2023-05-22
Supplement: s1 [file s1]

**Supplement Table S5.** Comparison of pathological scores (MEST-C scores) among groups with different relative abundance.

| Group                                        | Low<br>abundance<br>group | High<br>abundance<br>group | p-value |
|----------------------------------------------|---------------------------|----------------------------|---------|
| <b>Mesangial.hypercellularity</b>            |                           |                            | 0.524   |
| M0                                           | 3 (75.00%)                | 2 (33.33%)                 |         |
| M1                                           | 1 (25.00%)                | 4 (66.67%)                 |         |
| <b>Endocapillary_hypercellularity</b>        |                           |                            | 0.524   |
| EO                                           | 3 (75.00%)                | 2 (33.33%)                 |         |
| E1                                           | 1 (25.00%)                | 4 (66.67%)                 |         |
| <b>Segmental glomerulosclerosis/adhesion</b> |                           |                            | 0.2     |
| S0                                           | 4 (100.00%)               | 3 (50.00%)                 |         |
| S1                                           | 0 (0.00%)                 | 3 (50.00%)                 |         |
| <b>Tubular atrophy/interstitial fibrosis</b> |                           |                            | 0.467   |
| T0                                           | 4 (100.00%)               | 3 (50.00%)                 |         |
| T1                                           | 0 (0.00%)                 | 1 (16.67%)                 |         |
| T2                                           | 0 (0.00%)                 | 2 (33.33%)                 |         |
| <b>Crescents</b>                             |                           |                            | 1       |
| C0                                           | 4 (100.00%)               | 5 (83.33%)                 |         |
| C1                                           | 0 (0.00%)                 | 1 (16.67%)                 |         |
