# Supplementary material for: The Effects of Specific Gut Microbiota and Metabolites on IgA Nephropathy—Based on Mendelian Randomization and Clinical Validation
Source: Nutrients. 2023 May 22;15(10):2407. doi: 10.3390/nu15102407 (PMC10221929; doi:10.3390/nu15102407)
Supplement: Supplementary file 1 [file nutrients-15-02407-s001.zip]

Archive with 10 entries (10 files):
- Sup Figure S1.pdf
- Sup Figure S2.pdf
- Sup Figure S3.pdf
- Sup Figure S4.jpg
- Sup Figure S5.jpg
- Supple Table S4.pdf
- Supple Table S5.pdf
- Supplement Table S1.csv
- Supplement Table S2.csv
- Supplement Table S3.pdf
