# Supplementary material for: The Effects of Specific Gut Microbiota and Metabolites on IgA Nephropathy—Based on Mendelian Randomization and Clinical Validation
Source: Nutrients. 2023 May 22;15(10):2407. doi: 10.3390/nu15102407 (PMC10221929; doi:10.3390/nu15102407)
Supplement: Supplementary file 1 [file nutrients-15-02407-s001.zip › Supplement Table S1.csv]

Supplement table 4. The instrumental variables of the gut microbiota (p <1*10-5).
	bac	chr	bp	rsID	ref.allele	eff.allele	beta	SE	Z.weightedSumZ	P.weightedSumZ	N	Ncohorts
1	class.Actinobacteria.id.419	2	136616754	rs182549	T	C	0.111489458	0.012065989	9.193856057	3.79E-20	16313	24
2	class.Actinobacteria.id.419	2	136608646	rs4988235	A	G	0.109587095	0.012051542	9.045027347	1.50E-19	16313	24
3	class.Actinobacteria.id.419	2	136707982	rs6754311	T	C	0.108073394	0.01204701	8.932219916	4.18E-19	16312	24
4	class.Actinobacteria.id.419	2	135907088	rs6730157	A	G	0.107534473	0.011908911	8.992038266	2.43E-19	16313	24
5	class.Actinobacteria.id.419	2	136407479	rs1446585	A	G	0.108704219	0.012145809	8.864171074	7.71E-19	16182	23
6	class.Actinobacteria.id.419	2	135837906	rs7570971	C	A	0.106845585	0.011924282	8.986053098	2.56E-19	16182	23
7	class.Actinobacteria.id.419	2	136413650	rs36084664	A	G	-0.110465781	0.012884696	-8.9761316	2.80E-19	15292	21
8	class.Actinobacteria.id.419	2	136381348	rs12465802	G	A	0.106317607	0.011996094	8.849513405	8.79E-19	16313	24
9	class.Actinobacteria.id.419	2	135954797	rs1375131	T	C	0.105673811	0.011911372	8.844894017	9.16E-19	16312	24
10	class.Actinobacteria.id.419	2	136740900	rs687670	T	C	0.10557796	0.012309665	8.470087449	2.45E-17	16313	24
11	class.Actinobacteria.id.419	2	136043944	rs13023281	T	C	-0.103987586	0.012796597	-8.521040673	1.58E-17	15292	21
12	class.Actinobacteria.id.419	2	136721995	rs13404551	T	C	0.103988025	0.012298159	8.310339611	9.54E-17	16311	24
13	class.Actinobacteria.id.419	2	136685228	rs309160	C	T	0.102057938	0.012308599	8.157809411	3.41E-16	16313	24
14	class.Actinobacteria.id.419	2	136755684	rs309134	G	A	0.103649999	0.012491683	8.147770079	3.71E-16	16312	24
15	class.Actinobacteria.id.419	2	136670298	rs309168	C	T	0.101529332	0.012311071	8.114570106	4.88E-16	16313	24
16	class.Actinobacteria.id.419	2	136658345	rs218174	A	G	0.101509529	0.012314341	8.09038654	5.95E-16	16312	24
17	class.Actinobacteria.id.419	2	136322676	rs6759321	G	T	0.098790374	0.012096574	8.067781951	7.16E-16	16182	23
18	class.Actinobacteria.id.419	2	136614255	rs309180	A	G	0.100267885	0.012323787	7.998714349	1.26E-15	16313	24
19	class.Actinobacteria.id.419	2	136721603	rs12615624	A	G	0.101483288	0.012492075	7.97155101	1.57E-15	16313	24
20	class.Actinobacteria.id.419	2	136638216	rs632632	T	C	0.099476266	0.012313681	7.929415425	2.20E-15	16312	24
21	class.Actinobacteria.id.419	2	136092061	rs1561277	C	A	0.097120965	0.012075944	7.932380454	2.15E-15	16182	23
22	class.Actinobacteria.id.419	2	136643555	rs309125	C	T	0.098487052	0.012316433	7.857762176	3.91E-15	16312	24
23	class.Actinobacteria.id.419	2	136691825	rs309164	T	C	0.099854073	0.012494252	7.850552194	4.14E-15	16313	24
24	class.Actinobacteria.id.419	2	136622046	rs4988183	T	C	0.099486162	0.012584301	7.746341182	9.46E-15	16312	24
25	class.Actinobacteria.id.419	2	136698098	rs309149	C	T	0.098102773	0.012494482	7.715793162	1.20E-14	16313	24
26	class.Actinobacteria.id.419	2	136765951	rs309137	T	C	0.096344259	0.012280105	7.718391387	1.18E-14	16313	24
27	class.Actinobacteria.id.419	2	136608231	rs4954490	A	G	0.095789946	0.012394824	7.578631337	3.49E-14	16308	24
28	class.Actinobacteria.id.419	2	136787402	rs6716536	C	T	0.092325407	0.012122405	7.525055514	5.27E-14	16182	23
29	class.Actinobacteria.id.419	2	136594158	rs2236783	A	G	0.095576551	0.012415859	7.535645069	4.86E-14	16313	24
30	class.Actinobacteria.id.419	2	136589612	rs12620033	G	C	0.095206017	0.012412949	7.508150804	6.00E-14	16313	24
31	class.Actinobacteria.id.419	2	136820076	rs11681248	T	C	0.088817178	0.011842271	7.411077471	1.25E-13	16308	24
32	class.Actinobacteria.id.419	2	136603276	rs3754686	C	T	0.092911999	0.012393344	7.358252844	1.86E-13	16313	24
33	class.Actinobacteria.id.419	2	136583192	rs745500	A	G	0.092724535	0.012399915	7.323087086	2.42E-13	16313	24
34	class.Actinobacteria.id.419	2	136602491	rs3739020	T	G	0.094249886	0.01268144	7.279125472	3.36E-13	16310	24
35	class.Actinobacteria.id.419	2	136596867	rs6742283	G	A	0.092269116	0.012411753	7.294123236	3.01E-13	16310	24
36	class.Actinobacteria.id.419	2	136575199	rs6719488	T	G	0.092275189	0.012400018	7.290108815	3.10E-13	16313	24
37	class.Actinobacteria.id.419	2	136576577	rs892715	C	T	0.092196887	0.012400211	7.284881689	3.22E-13	16313	24
38	class.Actinobacteria.id.419	2	136603366	rs3769005	G	C	0.09180066	0.012392714	7.27778365	3.39E-13	16313	24
39	class.Actinobacteria.id.419	2	136557319	rs2322660	T	C	0.091997628	0.012396558	7.277425055	3.40E-13	16313	24
40	class.Actinobacteria.id.419	2	136569848	rs12988076	A	C	0.091947443	0.012400551	7.262684904	3.79E-13	16313	24
41	class.Actinobacteria.id.419	2	136555659	rs2322659	C	T	0.092966527	0.012659314	7.201072631	5.97E-13	16313	24
42	class.Actinobacteria.id.419	2	136558157	rs748841	T	C	0.09174693	0.012396927	7.254409238	4.03E-13	16313	24
43	class.Actinobacteria.id.419	2	136581848	rs1470457	A	G	0.092962861	0.01268034	7.172774622	7.35E-13	16313	24
44	class.Actinobacteria.id.419	2	136786651	rs12475139	T	A	0.088998372	0.012259488	7.16745659	7.64E-13	16182	23
45	class.Actinobacteria.id.419	2	136580287	rs2164210	C	T	0.089928385	0.012401156	7.114765558	1.12E-12	16313	24
46	class.Actinobacteria.id.419	2	135911422	rs17261772	T	C	0.09207135	0.012486601	7.245765931	4.30E-13	16182	23
47	class.Actinobacteria.id.419	2	136439517	rs313519	A	C	0.09085631	0.0125815	7.121730501	1.07E-12	16313	24
48	class.Actinobacteria.id.419	2	136439090	rs313518	C	T	0.090733171	0.012580992	7.103305819	1.22E-12	16313	24
49	class.Actinobacteria.id.419	2	136817088	rs749873	T	C	0.084902739	0.011856868	7.073669847	1.51E-12	16313	24
50	class.Actinobacteria.id.419	2	136544197	rs10928546	T	C	0.090859846	0.012628692	7.064182243	1.62E-12	16313	24
51	class.Actinobacteria.id.419	2	136455600	rs71348714	A	G	0.089864329	0.012580145	7.038428988	1.94E-12	16313	24
52	class.Actinobacteria.id.419	2	136437507	rs313517	A	G	0.089849265	0.012580624	7.036760119	1.97E-12	16313	24
53	class.Actinobacteria.id.419	2	136550109	rs2082729	T	C	0.090523632	0.012635172	7.024002532	2.16E-12	16313	24
54	class.Actinobacteria.id.419	2	136535410	rs71348715	T	G	0.090416704	0.012631999	7.022771065	2.18E-12	16313	24
55	class.Actinobacteria.id.419	2	136539122	rs11684545	T	G	0.090240005	0.012630974	7.017418612	2.26E-12	16313	24
56	class.Actinobacteria.id.419	2	136445526	rs313526	C	T	0.089713457	0.012579242	7.024620814	2.15E-12	16313	24
57	class.Actinobacteria.id.419	2	136422171	rs2034276	A	T	0.089593997	0.012578861	7.02059254	2.21E-12	16313	24
58	class.Actinobacteria.id.419	2	136445869	rs313528	G	A	0.089638621	0.012578977	7.020422553	2.21E-12	16313	24
59	class.Actinobacteria.id.419	2	136420690	rs4954280	A	G	0.089587018	0.012576323	7.01748449	2.26E-12	16313	24
60	class.Actinobacteria.id.419	2	136522941	rs28453840	A	G	0.090038767	0.012622796	7.003486983	2.50E-12	16312	24
61	class.Actinobacteria.id.419	2	136419961	rs1446584	A	G	0.089397627	0.012575732	7.004522028	2.48E-12	16313	24
62	class.Actinobacteria.id.419	2	136432103	rs313523	G	A	0.089387824	0.012582579	7.002492776	2.51E-12	16313	24
63	class.Actinobacteria.id.419	2	136430866	rs313522	T	A	0.089353044	0.012582689	6.998440326	2.59E-12	16313	24
64	class.Actinobacteria.id.419	2	136502792	rs1438305	G	C	0.089905437	0.012632083	6.98168573	2.92E-12	16313	24
65	class.Actinobacteria.id.419	2	136553639	rs1011361	A	G	0.089833396	0.012635946	6.976497543	3.03E-12	16312	24
66	class.Actinobacteria.id.419	2	136494186	rs10202489	A	G	0.089610201	0.012609237	6.97530313	3.05E-12	16313	24
67	class.Actinobacteria.id.419	2	136428460	rs656326	A	C	0.089046206	0.012580204	6.976112346	3.03E-12	16313	24
68	class.Actinobacteria.id.419	2	136418348	rs6720287	A	G	0.089000339	0.012575978	6.975822519	3.04E-12	16313	24
69	class.Actinobacteria.id.419	2	136444123	rs313524	C	T	0.088980161	0.012579334	6.970381704	3.16E-12	16313	24
70	class.Actinobacteria.id.419	2	136551694	rs12998016	T	C	0.089534865	0.012637849	6.954219664	3.55E-12	16312	24
71	class.Actinobacteria.id.419	2	136416855	rs6715856	T	C	0.088785855	0.012576401	6.961326136	3.37E-12	16313	24
72	class.Actinobacteria.id.419	2	136554800	rs6430589	C	G	0.08909764	0.0126367	6.946549675	3.74E-12	16312	24
73	class.Actinobacteria.id.419	2	136499166	rs1438307	T	G	0.089380125	0.012627413	6.948261831	3.70E-12	16313	24
74	class.Actinobacteria.id.419	2	136503157	rs1438304	G	A	0.089476101	0.01263169	6.948002252	3.70E-12	16313	24
75	class.Actinobacteria.id.419	2	136416941	rs6755383	C	T	0.08874188	0.012577526	6.957990646	3.45E-12	16313	24
76	class.Actinobacteria.id.419	2	136495619	rs10195620	T	A	0.089464042	0.012636426	6.951690673	3.61E-12	16313	24
77	class.Actinobacteria.id.419	2	136462441	rs7355359	T	C	0.088694325	0.012580087	6.94519166	3.78E-12	16313	24
78	class.Actinobacteria.id.419	2	136521514	rs10192827	A	G	0.088990902	0.012623843	6.902929551	5.09E-12	16311	24
79	class.Actinobacteria.id.419	2	136410299	rs10928542	G	A	0.088315467	0.012577197	6.923903343	4.39E-12	16313	24
80	class.Actinobacteria.id.419	2	136507039	rs12998387	G	A	0.088914304	0.012621703	6.910093212	4.84E-12	16313	24
81	class.Actinobacteria.id.419	2	136511575	rs3213889	G	A	0.089037023	0.012632822	6.909706046	4.86E-12	16313	24
82	class.Actinobacteria.id.419	2	136402117	rs4954276	A	G	0.088514021	0.012576784	6.918564804	4.56E-12	16313	24
83	class.Actinobacteria.id.419	2	136413359	rs7608045	T	C	0.088257218	0.012577826	6.918047938	4.58E-12	16313	24
84	class.Actinobacteria.id.419	2	136522675	rs10173394	T	C	0.088885906	0.012622964	6.905023775	5.02E-12	16313	24
85	class.Actinobacteria.id.419	2	136470714	rs13412397	A	G	0.08864636	0.012596137	6.911455356	4.80E-12	16313	24
86	class.Actinobacteria.id.419	2	136409073	rs4954279	G	A	0.088079717	0.012576478	6.905155483	5.01E-12	16313	24
87	class.Actinobacteria.id.419	2	136398174	rs12619365	C	T	0.088220041	0.012621663	6.904276068	5.05E-12	16313	24
88	class.Actinobacteria.id.419	2	136817616	rs2011946	A	C	0.083827402	0.011941282	6.91078205	4.82E-12	16308	24
89	class.Actinobacteria.id.419	2	136474098	rs11679508	T	A	0.088211557	0.012596864	6.877040369	6.11E-12	16313	24
90	class.Actinobacteria.id.419	2	136518103	rs12994270	A	T	0.088453037	0.012623475	6.863233536	6.73E-12	16313	24
91	class.Actinobacteria.id.419	2	136403749	rs13413639	C	A	0.087759465	0.012575635	6.870452476	6.40E-12	16313	24
92	class.Actinobacteria.id.419	2	136495300	rs12469709	T	C	0.08811468	0.012638355	6.842485652	7.78E-12	16313	24
93	class.Actinobacteria.id.419	2	135877562	rs1869829	A	G	0.086891078	0.012483841	6.899873057	5.20E-12	16313	24
94	class.Actinobacteria.id.419	2	136421323	rs1374329	A	G	0.088183138	0.012824731	6.770211718	1.29E-11	16313	24
95	class.Actinobacteria.id.419	2	136544752	rs6760329	G	A	0.088748434	0.013012964	6.699771408	2.09E-11	16313	24
96	class.Actinobacteria.id.419	2	136522710	rs9287442	G	A	0.088548899	0.012961354	6.687983827	2.26E-11	16313	24
97	class.Actinobacteria.id.419	2	136539513	rs10188066	A	G	0.088340505	0.01301302	6.666231739	2.62E-11	16313	24
98	class.Actinobacteria.id.419	2	136501840	rs10928545	G	A	0.088431047	0.012969096	6.660561758	2.73E-11	16313	24
99	class.Actinobacteria.id.419	2	136751849	rs62160860	G	C	0.113158954	0.017036232	6.662915054	2.68E-11	16310	24
100	class.Actinobacteria.id.419	2	136808949	rs11693502	T	C	0.081005811	0.011933651	6.709268886	1.96E-11	16312	24
101	class.Actinobacteria.id.419	2	136528004	rs2304599	G	C	0.088374444	0.013018925	6.652786828	2.88E-11	16313	24
102	class.Actinobacteria.id.419	2	136516748	rs12616520	T	A	0.088030989	0.012961613	6.648320737	2.96E-11	16313	24
103	class.Actinobacteria.id.419	2	135771974	rs10187402	C	G	0.084660898	0.012525718	6.734088742	1.65E-11	16308	24
104	class.Actinobacteria.id.419	2	136731066	rs4954551	G	A	0.109879059	0.016819008	6.591230579	4.36E-11	16313	24
105	class.Actinobacteria.id.419	2	136733897	rs7587285	T	C	0.110115748	0.016797841	6.606197851	3.94E-11	16313	24
106	class.Actinobacteria.id.419	2	136546110	rs2278544	G	A	0.087136792	0.012982863	6.566428984	5.15E-11	16313	24
107	class.Actinobacteria.id.419	2	136743490	rs2278683	A	C	0.109872086	0.016806417	6.579777956	4.71E-11	16312	24
108	class.Actinobacteria.id.419	2	136747085	rs11893318	T	C	0.109383161	0.016819782	6.549850137	5.76E-11	16312	24
109	class.Actinobacteria.id.419	2	136812931	rs11679933	T	G	0.080213105	0.011944174	6.61690483	3.67E-11	16309	24
110	class.Actinobacteria.id.419	2	136553529	rs1030764	T	C	0.086957811	0.013020786	6.542079075	6.07E-11	16313	24
111	class.Actinobacteria.id.419	2	136505546	rs3820794	T	C	0.086478036	0.013002688	6.51375728	7.33E-11	16313	24
112	class.Actinobacteria.id.419	2	136825272	rs932206	T	C	0.075947109	0.011515065	6.558160132	5.45E-11	16182	23
113	class.Actinobacteria.id.419	2	136783169	rs6714750	A	G	0.084925073	0.012622457	6.592483243	4.33E-11	16182	23
114	class.Actinobacteria.id.419	2	136873549	rs2680880	T	A	0.07749953	0.011512623	6.57521872	4.86E-11	16313	24
115	class.Actinobacteria.id.419	2	135775130	rs7581382	T	C	-0.085112891	0.014138109	-6.523275039	6.88E-11	15292	21
116	class.Actinobacteria.id.419	2	136022798	rs935613	C	T	0.082519506	0.012518841	6.533737574	6.41E-11	16313	24
117	class.Actinobacteria.id.419	2	135954405	rs1375132	A	G	0.082251859	0.012497509	6.511043455	7.46E-11	16311	24
118	class.Actinobacteria.id.419	2	135915358	rs6747073	T	C	0.080711403	0.012485667	6.399948289	1.55E-10	16311	24
119	class.Actinobacteria.id.419	2	136819662	rs6704561	C	T	0.078466024	0.012321859	6.295125407	3.07E-10	16182	23
120	class.Actinobacteria.id.419	2	136720344	rs3768998	G	T	0.105218877	0.017353131	6.09637117	1.09E-09	16312	24
121	class.Actinobacteria.id.419	2	136058820	rs2016636	G	A	0.079581891	0.012522535	6.285264925	3.27E-10	16313	24
122	class.Actinobacteria.id.419	2	135832131	rs12328663	T	C	0.096557294	0.015792588	6.332818734	2.41E-10	16313	24
123	class.Actinobacteria.id.419	2	135796410	rs13389481	C	A	0.098223207	0.016163539	6.258728728	3.88E-10	16311	24
124	class.Actinobacteria.id.419	2	135818907	rs2874739	C	T	0.096775069	0.015789364	6.317281515	2.66E-10	16313	24
125	class.Actinobacteria.id.419	2	136002500	rs1900741	C	T	0.08573175	0.013616733	6.136048352	8.46E-10	16313	24
126	class.Actinobacteria.id.419	2	135829432	rs10193348	A	G	0.096312468	0.015796247	6.295294521	3.07E-10	16313	24
127	class.Actinobacteria.id.419	2	135795443	rs10167901	C	T	0.096235622	0.01585336	6.247274823	4.18E-10	16313	24
128	class.Actinobacteria.id.419	2	135795385	rs10167809	C	T	0.096029981	0.015852021	6.237755963	4.44E-10	16313	24
129	class.Actinobacteria.id.419	2	135795150	rs4953948	T	G	0.096018754	0.015852093	6.237196855	4.45E-10	16313	24
130	class.Actinobacteria.id.419	2	135795095	rs4954216	G	A	0.095953022	0.015852187	6.232162889	4.60E-10	16313	24
131	class.Actinobacteria.id.419	2	135849613	rs7568525	G	A	0.095041372	0.015838416	6.239442227	4.39E-10	16313	24
132	class.Actinobacteria.id.419	2	135795396	rs10167884	C	T	0.095794385	0.015853458	6.221669746	4.92E-10	16313	24
133	class.Actinobacteria.id.419	2	135794986	rs4954215	G	A	0.095756222	0.015852965	6.221578628	4.92E-10	16313	24
134	class.Actinobacteria.id.419	2	135853807	rs10208624	C	T	0.095042436	0.01583501	6.236971123	4.46E-10	16313	24
135	class.Actinobacteria.id.419	2	135799082	rs62168942	T	C	0.095782571	0.015850012	6.213371683	5.19E-10	16313	24
136	class.Actinobacteria.id.419	2	135795595	rs10182750	T	C	0.095712624	0.015855025	6.211132071	5.26E-10	16313	24
137	class.Actinobacteria.id.419	2	135795040	rs4953947	A	C	0.095549635	0.015855068	6.207798802	5.37E-10	16313	24
138	class.Actinobacteria.id.419	2	135814716	rs7422031	C	T	0.09537389	0.015789221	6.225289746	4.81E-10	16313	24
139	class.Actinobacteria.id.419	2	135798082	rs13409400	A	C	0.095475098	0.015849951	6.19537123	5.81E-10	16313	24
140	class.Actinobacteria.id.419	2	135861497	rs7573600	G	C	0.094677561	0.015799864	6.21459503	5.15E-10	16313	24
141	class.Actinobacteria.id.419	2	135798758	rs62168941	C	T	0.09544318	0.015850431	6.189127889	6.05E-10	16313	24
142	class.Actinobacteria.id.419	2	136628380	rs4954513	G	A	0.106225161	0.01741287	6.002360044	1.94E-09	16313	24
143	class.Actinobacteria.id.419	2	136704414	rs16832275	C	G	0.101256123	0.016798053	5.994019452	2.05E-09	16313	24
144	class.Actinobacteria.id.419	2	135859923	rs11898045	T	C	0.094423906	0.01580262	6.208722428	5.34E-10	16313	24
145	class.Actinobacteria.id.419	2	135812969	rs56903548	C	T	0.094609462	0.015791205	6.184144728	6.24E-10	16313	24
146	class.Actinobacteria.id.419	2	135801228	rs4954217	C	T	0.095035811	0.015848896	6.169430657	6.85E-10	16313	24
147	class.Actinobacteria.id.419	2	135796155	rs13413872	G	T	0.095051294	0.015854008	6.171456536	6.77E-10	16313	24
148	class.Actinobacteria.id.419	2	135796000	rs13402112	A	C	0.095051294	0.015854008	6.171456536	6.77E-10	16313	24
149	class.Actinobacteria.id.419	2	135797223	rs10186594	A	G	0.095043727	0.015845488	6.168982236	6.87E-10	16313	24
150	class.Actinobacteria.id.419	2	135860305	rs58426504	T	G	0.094071712	0.015801449	6.187232539	6.12E-10	16313	24
151	class.Actinobacteria.id.419	2	135793565	rs4954214	C	T	0.094918768	0.015858519	6.169301435	6.86E-10	16313	24
152	class.Actinobacteria.id.419	2	136615222	rs3213871	C	T	0.105537969	0.017465868	5.972539686	2.34E-09	16313	24
153	class.Actinobacteria.id.419	2	135800757	rs921859	A	G	0.094790487	0.015849087	6.155972273	7.46E-10	16313	24
154	class.Actinobacteria.id.419	2	135871624	rs58697996	G	A	0.094276997	0.015838246	6.181027211	6.37E-10	16313	24
155	class.Actinobacteria.id.419	2	135802050	rs7601696	C	A	0.094789448	0.015846724	6.149813182	7.76E-10	16313	24
156	class.Actinobacteria.id.419	2	135794367	rs6760553	A	G	0.094694129	0.015857609	6.157001988	7.41E-10	16313	24
157	class.Actinobacteria.id.419	2	135802148	rs7577258	G	A	0.0947071	0.015845348	6.145827311	7.95E-10	16313	24
158	class.Actinobacteria.id.419	2	135800601	rs2017831	C	T	0.094673304	0.015849251	6.146790866	7.91E-10	16313	24
159	class.Actinobacteria.id.419	2	136626004	rs3769002	T	C	0.105358074	0.017420502	5.964302165	2.46E-09	16313	24
160	class.Actinobacteria.id.419	2	136624919	rs56263017	T	C	0.105249003	0.017420722	5.960088609	2.52E-09	16313	24
161	class.Actinobacteria.id.419	2	135802028	rs7565268	T	C	0.094621164	0.015846749	6.139242667	8.29E-10	16313	24
162	class.Actinobacteria.id.419	2	135796965	rs56174523	A	C	0.094529845	0.015852969	6.139693219	8.27E-10	16313	24
163	class.Actinobacteria.id.419	2	135874038	rs61087958	C	T	0.094029899	0.015809377	6.158434239	7.35E-10	16313	24
164	class.Actinobacteria.id.419	2	135793684	rs4953946	T	G	0.094259581	0.015858505	6.13452271	8.54E-10	16313	24
165	class.Actinobacteria.id.419	2	135793845	rs11888951	T	C	0.094149541	0.015857812	6.124406409	9.10E-10	16313	24
166	class.Actinobacteria.id.419	2	135802020	rs7601683	C	T	0.094131608	0.015847081	6.107694337	1.01E-09	16313	24
167	class.Actinobacteria.id.419	2	135797747	rs10174944	C	T	0.094023496	0.015852934	6.10607058	1.02E-09	16312	24
168	class.Actinobacteria.id.419	2	135872646	rs4954220	C	A	0.093404663	0.015836696	6.131443158	8.71E-10	16313	24
169	class.Actinobacteria.id.419	2	135801956	rs7565149	T	A	0.094009341	0.015846985	6.103764399	1.04E-09	16313	24
170	class.Actinobacteria.id.419	2	135792528	rs62168934	A	G	0.094002102	0.015858901	6.104050652	1.03E-09	16313	24
171	class.Actinobacteria.id.419	2	135789784	rs60350840	A	G	0.094081128	0.015860786	6.09670818	1.08E-09	16313	24
172	class.Actinobacteria.id.419	2	135773446	rs4346445	A	C	0.092149751	0.015856338	6.077384358	1.22E-09	16311	24
173	class.Actinobacteria.id.419	2	136027264	rs16831498	G	C	0.095489553	0.016059843	6.138181542	8.35E-10	16313	24
174	class.Actinobacteria.id.419	2	136671801	rs2164332	G	C	0.09845983	0.016787736	5.851870901	4.86E-09	16313	24
175	class.Actinobacteria.id.419	2	135766072	rs4953945	C	G	0.094653922	0.015924691	6.090964978	1.12E-09	16311	24
176	class.Actinobacteria.id.419	2	136636909	rs7608980	G	A	0.105344585	0.017433694	5.918393646	3.25E-09	16313	24
177	class.Actinobacteria.id.419	2	136901587	rs4954567	G	T	0.073259211	0.012003505	6.077874911	1.22E-09	16313	24
178	class.Actinobacteria.id.419	2	135874622	rs6741481	A	G	0.092979876	0.01579978	6.096378927	1.08E-09	16313	24
179	class.Actinobacteria.id.419	2	135893853	rs7603805	A	G	0.093578038	0.015792162	6.118606888	9.44E-10	16313	24
180	class.Actinobacteria.id.419	2	136637350	rs16832138	G	A	0.105094258	0.017428929	5.906209621	3.50E-09	16313	24
181	class.Actinobacteria.id.419	2	135878814	rs2290518	G	A	0.092692773	0.015797887	6.078098473	1.22E-09	16313	24
182	class.Actinobacteria.id.419	2	136677192	rs2322725	T	C	0.097878651	0.016793872	5.822107504	5.81E-09	16313	24
183	class.Actinobacteria.id.419	2	136016079	rs11884903	T	C	0.094498387	0.016007125	6.102264424	1.05E-09	16313	24
184	class.Actinobacteria.id.419	2	136652859	rs16832156	G	A	0.09840104	0.016820439	5.797895914	6.72E-09	16312	24
185	class.Actinobacteria.id.419	2	136908062	rs1401687	G	C	0.072586071	0.012004253	6.020738379	1.74E-09	16313	24
186	class.Actinobacteria.id.419	2	135774681	rs11903663	A	G	0.089587904	0.015816972	5.987423953	2.13E-09	16311	24
187	class.Actinobacteria.id.419	2	135884487	rs58327215	G	C	0.09257969	0.015831589	6.072822586	1.26E-09	16313	24
188	class.Actinobacteria.id.419	2	136646900	rs6752519	C	T	0.102435828	0.017385382	5.814819668	6.07E-09	16313	24
189	class.Actinobacteria.id.419	2	136633011	rs309132	C	G	0.102406075	0.017174664	5.824208255	5.74E-09	16313	24
190	class.Actinobacteria.id.419	2	136637622	rs56067372	C	T	0.103578272	0.017432967	5.817609176	5.97E-09	16313	24
191	class.Actinobacteria.id.419	2	135773617	rs4640444	T	C	0.08952227	0.015818456	5.975182038	2.30E-09	16311	24
192	class.Actinobacteria.id.419	2	135787642	rs1551497	T	C	0.093100273	0.015858841	6.039627364	1.54E-09	16312	24
193	class.Actinobacteria.id.419	2	136910834	rs10179271	T	C	0.072336221	0.012003756	6.001674459	1.95E-09	16313	24
194	class.Actinobacteria.id.419	2	136683293	rs16832200	T	C	0.097188421	0.016795609	5.777771877	7.57E-09	16313	24
195	class.Actinobacteria.id.419	2	135773692	rs4645053	T	A	0.089511449	0.015818624	5.974551609	2.31E-09	16311	24
196	class.Actinobacteria.id.419	2	136488978	rs6739713	A	G	0.076980877	0.012758032	5.933406335	2.97E-09	16313	24
197	class.Actinobacteria.id.419	2	135780168	rs4954212	A	G	0.092512925	0.015823738	5.999628328	1.98E-09	16312	24
198	class.Actinobacteria.id.419	2	136590558	rs3754690	C	T	0.10574431	0.018013026	5.799366447	6.66E-09	16313	24
199	class.Actinobacteria.id.419	2	136667896	rs2164331	C	T	0.101664114	0.017438469	5.777987343	7.56E-09	16313	24
200	class.Actinobacteria.id.419	2	136659495	rs12478902	T	C	0.098520649	0.01702203	5.775937485	7.65E-09	16312	24
201	class.Actinobacteria.id.419	2	135885357	rs6430561	C	T	0.092369168	0.015834952	6.050531091	1.44E-09	16313	24
202	class.Actinobacteria.id.419	2	136191314	rs10209482	A	C	0.093768725	0.016032923	6.037840877	1.56E-09	16313	24
203	class.Actinobacteria.id.419	2	135785149	rs11890844	A	G	0.092553563	0.015875967	6.008290995	1.87E-09	16312	24
204	class.Actinobacteria.id.419	2	136907682	rs9941547	G	A	0.072335651	0.012050807	5.977661091	2.26E-09	16204	23
205	class.Actinobacteria.id.419	2	135880013	rs13410870	G	A	0.091672492	0.015800725	6.02455605	1.70E-09	16313	24
206	class.Actinobacteria.id.419	2	136643900	rs309126	T	C	0.096720627	0.016342258	5.809172602	6.28E-09	16313	24
207	class.Actinobacteria.id.419	2	135789405	rs6709763	C	A	0.091903891	0.015859812	5.967247946	2.41E-09	16313	24
208	class.Actinobacteria.id.419	2	135785066	rs13402101	T	A	0.09233846	0.015877296	5.986378201	2.15E-09	16312	24
209	class.Actinobacteria.id.419	2	135984172	rs57829242	A	G	0.093636818	0.016009409	6.032458171	1.61E-09	16313	24
210	class.Actinobacteria.id.419	2	135785068	rs13399376	A	G	0.092217321	0.015877352	5.980273335	2.23E-09	16312	24
211	class.Actinobacteria.id.419	2	136787476	rs74266324	G	A	0.08318772	0.014461505	5.776536395	7.63E-09	16182	23
212	class.Actinobacteria.id.419	2	136479302	rs3754692	T	C	0.076553838	0.012754621	5.898107667	3.68E-09	16313	24
213	class.Actinobacteria.id.419	2	135803766	rs17293519	A	G	0.090532505	0.015786271	5.945442522	2.76E-09	16313	24
214	class.Actinobacteria.id.419	2	135773420	rs4494812	A	G	0.088835324	0.015820689	5.920781307	3.20E-09	16311	24
215	class.Actinobacteria.id.419	2	136593694	rs55634455	T	C	0.104524517	0.017998225	5.751352929	8.85E-09	16313	24
216	class.Actinobacteria.id.419	2	136910690	rs4954568	T	A	0.071643548	0.012004226	5.943617657	2.79E-09	16313	24
217	class.Actinobacteria.id.419	2	135787148	rs16831264	G	C	0.091409617	0.015807221	5.960093107	2.52E-09	16312	24
218	class.Actinobacteria.id.419	2	136655620	rs6430593	G	A	0.097670486	0.01679915	5.740515121	9.44E-09	16313	24
219	class.Actinobacteria.id.419	2	135789472	rs6737635	G	T	0.091254227	0.015860178	5.922007485	3.18E-09	16313	24
220	class.Actinobacteria.id.419	2	136535364	rs60433564	A	C	0.119278141	0.020686618	5.868103807	4.41E-09	13623	22
221	class.Actinobacteria.id.419	2	135895879	rs6749119	C	G	0.090833406	0.015793491	5.97776804	2.26E-09	16313	24
222	class.Actinobacteria.id.419	2	136536113	rs10496736	C	G	0.118803639	0.020687313	5.858965316	4.66E-09	13623	22
223	class.Actinobacteria.id.419	2	135935049	rs6721838	A	G	0.091676364	0.015872357	6.003090587	1.94E-09	16313	24
224	class.Actinobacteria.id.419	2	136592309	rs78141345	G	A	0.103953239	0.018005086	5.715092388	1.10E-08	16313	24
225	class.Actinobacteria.id.419	2	135783367	rs11892750	G	A	0.091143618	0.015889925	5.888880718	3.89E-09	16312	24
226	class.Actinobacteria.id.419	2	136166536	rs13427494	G	A	0.092435447	0.016037488	5.948906112	2.70E-09	16313	24
227	class.Actinobacteria.id.419	2	136910273	rs6715785	G	A	0.070959351	0.012000111	5.889404038	3.88E-09	16312	24
228	class.Actinobacteria.id.419	2	135899069	rs11897204	T	C	0.090362694	0.015805484	5.942808439	2.80E-09	16313	24
229	class.Actinobacteria.id.419	2	135895809	rs6706466	A	G	0.090227127	0.015796972	5.943983676	2.78E-09	16313	24
230	class.Actinobacteria.id.419	2	135789682	rs56369660	A	G	0.08998264	0.015804907	5.883609416	4.01E-09	16313	24
231	class.Actinobacteria.id.419	2	136913375	rs4954569	C	T	0.070770158	0.011999903	5.877182478	4.17E-09	16312	24
232	class.Actinobacteria.id.419	2	136100473	rs4954242	A	G	0.093286684	0.016117467	5.930416893	3.02E-09	16313	24
233	class.Actinobacteria.id.419	2	135705558	rs1979033	G	A	0.065284933	0.011422812	5.918001707	3.26E-09	16308	24
234	class.Actinobacteria.id.419	2	135775049	rs11888521	G	C	0.087624651	0.015817103	5.848245431	4.97E-09	16311	24
235	class.Actinobacteria.id.419	2	135784733	rs13408096	G	T	0.090127548	0.015819859	5.872031416	4.30E-09	16312	24
236	class.Actinobacteria.id.419	2	136652093	rs12233092	G	A	0.095463692	0.016889224	5.643872247	1.66E-08	16310	24
237	class.Actinobacteria.id.419	2	135962711	rs4954226	T	C	0.091593866	0.016003748	5.929357857	3.04E-09	16313	24
238	class.Actinobacteria.id.419	2	135479980	rs6723108	G	T	0.066609032	0.011569367	5.966517654	2.42E-09	16313	24
239	class.Actinobacteria.id.419	2	135784227	rs4954213	G	T	0.089747168	0.015823459	5.849611521	4.93E-09	16312	24
240	class.Actinobacteria.id.419	2	136546635	rs4954633	C	T	0.115296118	0.020544734	5.792724875	6.93E-09	13623	22
241	class.Actinobacteria.id.419	2	136595426	rs56211644	T	C	0.102250701	0.017989803	5.635386098	1.75E-08	16313	24
242	class.Actinobacteria.id.419	2	135909462	rs4954221	G	A	0.089693881	0.015831501	5.895657443	3.73E-09	16313	24
243	class.Actinobacteria.id.419	2	135781635	rs11900832	C	T	0.089774021	0.015891668	5.815163098	6.06E-09	16312	24
244	class.Actinobacteria.id.419	2	135781301	rs7597802	A	T	0.089720355	0.015877202	5.813329373	6.12E-09	16312	24
245	class.Actinobacteria.id.419	2	136806959	rs925966	G	C	0.071210569	0.012199332	5.753983471	8.72E-09	16182	23
246	class.Actinobacteria.id.419	2	136901607	rs4954392	A	G	0.07000309	0.01201143	5.812578986	6.15E-09	16313	24
247	class.Actinobacteria.id.419	2	136917355	rs4954570	G	C	0.073233341	0.012853633	5.769089177	7.97E-09	16311	24
248	class.Actinobacteria.id.419	2	136898078	rs950176	A	G	0.069850893	0.012020106	5.77970399	7.48E-09	16311	24
249	class.Actinobacteria.id.419	2	135776430	rs61663334	A	G	0.086291218	0.015831745	5.780325964	7.46E-09	16312	24
250	class.Actinobacteria.id.419	2	135781522	rs11889843	G	A	0.089004926	0.01582269	5.795066858	6.83E-09	16312	24
251	class.Actinobacteria.id.419	2	135780587	rs7563997	T	A	0.088955402	0.01582554	5.791549681	6.97E-09	16312	24
252	class.Actinobacteria.id.419	2	136169799	rs6742013	T	C	0.090377012	0.016036662	5.830486966	5.53E-09	16313	24
253	class.Actinobacteria.id.419	2	136586828	rs57543738	T	C	0.101652043	0.018088019	5.595201899	2.20E-08	16313	24
254	class.Actinobacteria.id.419	2	136580398	rs60376570	G	A	0.101474024	0.018067958	5.594723869	2.21E-08	16313	24
255	class.Actinobacteria.id.419	2	136537057	rs72972104	G	A	0.113927173	0.020549251	5.725908664	1.03E-08	13623	22
256	class.Actinobacteria.id.419	2	136902666	rs12616955	C	T	0.069719868	0.012011438	5.789023909	7.08E-09	16313	24
257	class.Actinobacteria.id.419	2	136781262	rs78793148	C	A	0.108269387	0.018821188	5.63724738	1.73E-08	16182	23
258	class.Actinobacteria.id.419	2	135755629	rs1530559	A	G	0.065463239	0.011429659	5.778297334	7.55E-09	16182	23
259	class.Actinobacteria.id.419	2	135782456	rs10928529	G	A	0.089148262	0.015890226	5.776242739	7.64E-09	16312	24
260	class.Actinobacteria.id.419	2	136485280	rs2874834	A	G	0.074212897	0.012788849	5.702881943	1.18E-08	16313	24
261	class.Actinobacteria.id.419	2	136901513	rs4954566	C	T	0.069316621	0.012010887	5.755704954	8.63E-09	16313	24
262	class.Actinobacteria.id.419	2	135928312	rs2305248	A	G	0.08852325	0.015798879	5.833772287	5.42E-09	16313	24
263	class.Actinobacteria.id.419	2	136552629	rs7565053	A	T	0.121058402	0.021538934	5.685734625	1.30E-08	13499	21
264	class.Actinobacteria.id.419	2	136773132	rs74697610	A	T	0.11037683	0.019992167	5.572161151	2.52E-08	16073	22
265	class.Actinobacteria.id.419	2	136641382	rs584226	T	C	0.096174482	0.017030889	5.550736989	2.84E-08	16313	24
266	class.Actinobacteria.id.419	2	136806774	rs7371606	A	G	0.07038619	0.012201695	5.684971164	1.31E-08	16182	23
267	class.Actinobacteria.id.419	2	136895508	rs4954564	A	G	0.069011798	0.012021702	5.711924752	1.12E-08	16311	24
268	class.Actinobacteria.id.419	2	136228887	rs7605229	C	T	0.090143199	0.016043937	5.80419681	6.47E-09	16313	24
269	class.Actinobacteria.id.419	2	136926719	rs4954572	G	T	0.069120987	0.012074658	5.719757816	1.07E-08	16313	24
270	class.Actinobacteria.id.419	2	136553925	rs4954430	C	T	0.115054329	0.020760528	5.675712345	1.38E-08	13622	22
271	class.Actinobacteria.id.419	2	136945029	rs1123848	C	T	0.068848308	0.012101964	5.683265121	1.32E-08	16311	24
272	class.Actinobacteria.id.419	2	136110129	rs6727889	C	T	0.089980517	0.016045619	5.765359333	8.15E-09	16313	24
273	class.Actinobacteria.id.419	2	136927557	rs4954396	A	C	0.068963058	0.0120741	5.705963474	1.16E-08	16313	24
274	class.Actinobacteria.id.419	2	136642433	rs16855656	A	G	0.091962202	0.016445292	5.515596248	3.48E-08	16313	24
275	class.Actinobacteria.id.419	2	136524766	rs62170081	A	G	0.115011262	0.020691734	5.654882655	1.56E-08	13623	22
276	class.Actinobacteria.id.419	2	136907790	rs10803550	C	T	0.068725519	0.012012369	5.711060176	1.12E-08	16313	24
277	class.Actinobacteria.id.419	2	136907170	rs953387	A	C	0.068540618	0.012012101	5.699897306	1.20E-08	16313	24
278	class.Actinobacteria.id.419	2	136906640	rs2102896	T	C	0.068512963	0.012013896	5.698596868	1.21E-08	16313	24
279	class.Actinobacteria.id.419	2	136578194	rs2874874	A	C	0.100070075	0.018061634	5.508713335	3.61E-08	16313	24
280	class.Actinobacteria.id.419	2	136899116	rs2056297	G	T	0.06849723	0.012011683	5.68584262	1.30E-08	16313	24
281	class.Actinobacteria.id.419	2	136553438	rs56982689	C	T	0.113006821	0.020743255	5.622093626	1.89E-08	13623	22
282	class.Actinobacteria.id.419	2	136578040	rs2322812	A	G	0.099447623	0.01806194	5.469205241	4.52E-08	16313	24
283	class.Actinobacteria.id.419	2	136570613	rs3769011	A	T	0.098394372	0.01807151	5.410760417	6.28E-08	16313	24
284	class.Actinobacteria.id.419	2	136522783	rs72970286	T	G	0.111213138	0.020360423	5.595919505	2.19E-08	13622	22
285	class.Actinobacteria.id.419	2	136515924	rs6707289	A	G	0.113992284	0.020691692	5.595683864	2.20E-08	13623	22
286	class.Actinobacteria.id.419	2	136515859	rs6720497	G	A	0.113994875	0.020691943	5.595683864	2.20E-08	13623	22
287	class.Actinobacteria.id.419	2	136574305	rs58080116	A	G	0.099303652	0.018063561	5.455598214	4.88E-08	16313	24
288	class.Actinobacteria.id.419	2	136946433	rs4954397	A	G	0.067861366	0.012098782	5.603080291	2.11E-08	16313	24
289	class.Actinobacteria.id.419	2	136939437	rs1964776	C	T	0.068118001	0.01210425	5.613704932	1.98E-08	16313	24
290	class.Actinobacteria.id.419	2	135914038	rs11897217	C	T	0.086488706	0.015836523	5.718606742	1.07E-08	16313	24
291	class.Actinobacteria.id.419	2	136560003	rs61470941	T	C	0.097722202	0.018049709	5.431030713	5.60E-08	16313	24
292	class.Actinobacteria.id.419	2	136926222	rs10928558	T	C	0.06884562	0.012250043	5.611091203	2.01E-08	16312	24
293	class.Actinobacteria.id.419	2	136571982	rs4954445	T	A	0.098495545	0.018066556	5.426837382	5.74E-08	16313	24
294	class.Actinobacteria.id.419	2	135912977	rs7594509	G	T	0.086439879	0.015838645	5.711257718	1.12E-08	16313	24
295	class.Actinobacteria.id.419	2	135921839	rs2322445	T	A	0.08650731	0.015825777	5.71074109	1.12E-08	16313	24
296	class.Actinobacteria.id.419	2	136905697	rs12473760	C	A	0.067528357	0.012013337	5.618774943	1.92E-08	16313	24
297	class.Actinobacteria.id.419	2	136948711	rs4954577	A	G	0.067598915	0.0120979	5.579079334	2.42E-08	16313	24
298	class.Actinobacteria.id.419	2	136520186	rs6729961	T	G	0.113563357	0.020688964	5.553971326	2.79E-08	13623	22
299	class.Actinobacteria.id.419	2	136288273	rs3806502	C	T	0.087717735	0.016034571	5.676697152	1.37E-08	16313	24
300	class.Actinobacteria.id.419	2	135925002	rs6705610	T	G	0.085961415	0.015800945	5.694150582	1.24E-08	16313	24
301	class.Actinobacteria.id.419	2	136509573	rs16831994	T	C	0.111353659	0.020547662	5.540987091	3.01E-08	13623	22
302	class.Actinobacteria.id.419	2	136949744	rs16833335	G	A	0.067347262	0.012094318	5.556084641	2.76E-08	16313	24
303	class.Actinobacteria.id.419	2	135689188	rs6738563	G	T	0.062379746	0.011429728	5.642915059	1.67E-08	16309	24
304	class.Actinobacteria.id.419	2	136965117	rs1519525	C	T	0.067175692	0.012076011	5.539986352	3.02E-08	16313	24
305	class.Actinobacteria.id.419	2	136496805	rs35215526	G	A	0.103585994	0.018752435	5.431806506	5.58E-08	16309	24
306	class.Actinobacteria.id.419	2	136857158	rs13008147	A	G	-0.068863962	0.012871671	-5.629192026	1.81E-08	15292	21
307	class.Actinobacteria.id.419	2	136511951	rs7609188	G	C	0.10986179	0.020553696	5.48949626	4.03E-08	13623	22
308	class.Actinobacteria.id.419	2	136599217	rs3820790	A	T	0.098229449	0.018267127	5.359465532	8.35E-08	16310	24
309	class.Actinobacteria.id.419	2	136496928	rs62168847	T	C	0.101922969	0.018654327	5.394722226	6.86E-08	16309	24
310	class.Actinobacteria.id.419	2	136562472	rs3739022	G	A	0.095760783	0.018058989	5.314194491	1.07E-07	16313	24
311	class.Actinobacteria.id.419	2	136563248	rs12992815	C	G	0.095102088	0.017921983	5.303899461	1.13E-07	16313	24
312	class.Actinobacteria.id.419	2	135778656	rs7565871	G	C	0.082554936	0.015918572	5.471158219	4.47E-08	16312	24
313	class.Actinobacteria.id.419	2	136496493	rs62168843	T	C	0.101382721	0.018654579	5.372824187	7.75E-08	16309	24
314	class.Actinobacteria.id.419	2	136496910	rs62168846	G	A	0.102551647	0.018752342	5.369726548	7.89E-08	16309	24
315	class.Actinobacteria.id.419	2	136538939	rs9677760	A	T	0.076100776	0.01378955	5.373816326	7.71E-08	16313	24
316	class.Actinobacteria.id.419	2	136958593	rs4954578	T	C	0.065978106	0.012075961	5.437613986	5.40E-08	16313	24
317	class.Actinobacteria.id.419	2	136927094	rs4954573	T	G	0.066649488	0.012244521	5.457000571	4.84E-08	16312	24
318	class.Actinobacteria.id.419	2	136539330	rs1865452	C	T	0.076047707	0.013865292	5.35336441	8.63E-08	16313	24
319	class.Actinobacteria.id.419	2	136539670	rs60963894	T	G	0.076042598	0.013864555	5.35336441	8.63E-08	16313	24
320	class.Actinobacteria.id.419	2	136540083	rs10496737	A	G	0.075998011	0.013864575	5.351007885	8.75E-08	16313	24
321	class.Actinobacteria.id.419	2	136923155	rs56036623	T	C	0.071193012	0.013264265	5.438539837	5.37E-08	16313	24
322	class.Actinobacteria.id.419	2	136963494	rs6716987	C	A	0.065695457	0.012077811	5.414274151	6.15E-08	16313	24
323	class.Actinobacteria.id.419	2	136527120	rs60453613	G	C	0.075494395	0.013863909	5.31295889	1.08E-07	16313	24
324	class.Actinobacteria.id.419	2	136510012	rs12469551	G	T	0.075382929	0.013790355	5.309961294	1.10E-07	16313	24
325	class.Actinobacteria.id.419	2	136942326	rs13010498	G	C	-0.067089095	0.012191625	-5.584907073	2.34E-08	16182	23
326	class.Actinobacteria.id.419	2	136509868	rs7595712	C	T	0.07547197	0.013863893	5.287401078	1.24E-07	16313	24
327	class.Actinobacteria.id.419	1	207003553	rs6660520	G	A	0.071148271	0.013449539	5.308300371	1.11E-07	16308	24
328	class.Actinobacteria.id.419	2	136496639	rs62168844	A	G	0.099192221	0.018655567	5.258839086	1.45E-07	16309	24
329	class.Actinobacteria.id.419	2	136520043	rs6708957	C	T	0.074845096	0.013863373	5.266864173	1.39E-07	16313	24
330	class.Actinobacteria.id.419	2	135429288	rs998451	A	G	0.061038231	0.011589236	5.507532272	3.64E-08	16312	24
331	class.Actinobacteria.id.419	1	207003956	rs7513988	T	C	0.069368338	0.013187107	5.295528679	1.19E-07	16309	24
332	class.Actinobacteria.id.419	2	136292425	rs6745996	A	G	0.088038708	0.01669704	5.422996265	5.86E-08	16313	24
333	class.Actinobacteria.id.419	2	136658837	rs80274970	C	T	0.101176334	0.019679868	5.168172929	2.36E-07	15823	22
334	class.Actinobacteria.id.419	1	207003374	rs12022129	A	G	0.069756094	0.013264752	5.291363233	1.21E-07	16310	24
335	class.Actinobacteria.id.419	2	136542560	rs1469996	A	G	0.075456987	0.013933365	5.261687387	1.43E-07	16182	23
336	class.Actinobacteria.id.419	2	136565328	rs60274701	G	A	0.094091136	0.017873981	5.225625829	1.74E-07	16312	24
337	class.Actinobacteria.id.419	2	136917330	rs4954394	A	G	0.067064479	0.012926159	5.31121506	1.09E-07	16313	24
338	class.Actinobacteria.id.419	2	136925439	rs10193587	T	C	0.065626513	0.012348187	5.336832877	9.46E-08	16182	23
339	class.Actinobacteria.id.419	1	207003319	rs4845143	T	G	0.069112187	0.013274691	5.251441352	1.51E-07	16310	24
340	class.Actinobacteria.id.419	2	136530443	rs147616090	C	T	0.074159244	0.013847695	5.22300701	1.76E-07	16313	24
341	class.Actinobacteria.id.419	2	136542559	rs1469995	G	A	0.073998259	0.013848557	5.215988476	1.83E-07	16308	24
342	class.Actinobacteria.id.419	2	136501509	rs6732236	T	G	0.073843398	0.013863059	5.194261719	2.06E-07	16313	24
343	class.Actinobacteria.id.419	2	136576166	rs7564577	C	T	0.081554789	0.01615393	5.156257172	2.52E-07	16311	24
344	class.Actinobacteria.id.419	2	135456759	rs10928513	C	T	0.060900525	0.011536806	5.410587683	6.28E-08	16312	24
345	class.Actinobacteria.id.419	2	136773638	rs7604460	T	C	0.082519151	0.015531722	5.197823999	2.02E-07	16182	23
346	class.Actinobacteria.id.419	2	136506927	rs6430585	C	A	0.072944576	0.013759779	5.146050998	2.66E-07	16313	24
347	class.Actinobacteria.id.419	2	135763318	rs7582173	G	A	0.078348794	0.014617424	5.117334613	3.10E-07	16313	24
348	class.Actinobacteria.id.419	2	135768352	rs7575241	C	A	0.073352095	0.013998686	5.104527362	3.32E-07	16312	24
349	class.Actinobacteria.id.419	2	136556805	rs872151	C	T	0.09060696	0.017791384	5.116013156	3.12E-07	16313	24
350	class.Actinobacteria.id.419	2	136770509	rs12471781	G	A	0.0818178	0.015614566	5.162603968	2.44E-07	16182	23
351	class.Actinobacteria.id.419	2	136808142	rs4954388	T	C	0.063840713	0.01231688	5.143634979	2.69E-07	16309	24
352	class.Actinobacteria.id.419	2	136918828	rs4954571	G	A	0.065390811	0.012927042	5.176078863	2.27E-07	16311	24
353	class.Actinobacteria.id.419	1	207001879	rs1028182	C	T	0.067633761	0.013278287	5.131604764	2.87E-07	16310	24
354	class.Actinobacteria.id.419	2	135762656	rs10197646	G	A	0.077468881	0.01462006	5.061205277	4.17E-07	16313	24
355	class.Actinobacteria.id.419	2	136928320	rs7568884	C	T	0.063043504	0.012244757	5.184597734	2.16E-07	16313	24
356	class.Actinobacteria.id.419	2	136801201	rs4954556	G	A	0.122599995	0.024743574	5.129783523	2.90E-07	9647	17
357	class.Actinobacteria.id.419	2	136930232	rs13415439	C	A	0.062851545	0.012242766	5.169725548	2.34E-07	16313	24
358	class.Actinobacteria.id.419	2	136526981	rs60241067	A	T	0.063417262	0.012529433	4.975973845	6.49E-07	16313	24
359	class.Actinobacteria.id.419	2	136506375	rs7556781	A	G	0.071595959	0.013743474	5.061969733	4.15E-07	16313	24
360	class.Actinobacteria.id.419	2	136935394	rs4954575	G	A	0.062718479	0.012262782	5.151123267	2.59E-07	16313	24
361	class.Actinobacteria.id.419	2	136321951	rs6430580	A	G	0.084458615	0.016713632	5.208653839	1.90E-07	16313	24
362	class.Actinobacteria.id.419	2	135758231	rs6733547	G	T	0.080426807	0.016038245	5.145682685	2.67E-07	16312	24
363	class.Actinobacteria.id.419	2	135762429	rs10174462	C	G	0.073705361	0.014022405	5.073202923	3.91E-07	16313	24
364	class.Actinobacteria.id.419	1	206997892	rs2056226	C	G	0.068193342	0.013581296	5.03841537	4.69E-07	16182	23
365	class.Actinobacteria.id.419	1	207001190	rs6540645	C	G	0.068132402	0.013514144	5.062832361	4.13E-07	16308	24
366	class.Actinobacteria.id.419	2	136555484	rs1807356	T	C	0.081038007	0.01628512	5.045268729	4.53E-07	16313	24
367	class.Actinobacteria.id.419	2	136504101	rs7589832	A	C	0.071770125	0.01384674	5.034713546	4.79E-07	16313	24
368	class.Actinobacteria.id.419	2	136811263	rs13007153	T	C	0.062807791	0.012310751	5.056881739	4.26E-07	16308	24
369	class.Actinobacteria.id.419	2	136500475	rs73958618	A	G	0.071146819	0.013830141	5.010229917	5.44E-07	16313	24
370	class.Actinobacteria.id.419	1	207001709	rs1028181	C	T	0.067467746	0.013513652	5.010761571	5.42E-07	16308	24
371	class.Actinobacteria.id.419	2	136932321	rs59869505	A	C	0.061720597	0.012230926	5.091845456	3.55E-07	16313	24
372	class.Actinobacteria.id.419	2	136929107	rs72976292	T	A	0.061800754	0.012237473	5.091122821	3.56E-07	16308	24
373	class.Actinobacteria.id.419	2	136600176	rs55809728	G	A	0.107352932	0.021800582	5.048055016	4.46E-07	13617	22
374	class.Actinobacteria.id.419	2	136759379	rs309124	A	G	0.074721535	0.014592514	5.065962238	4.06E-07	16312	24
375	class.Actinobacteria.id.419	2	136607703	rs4988243	T	C	0.112091243	0.022405388	5.040393378	4.65E-07	13514	21
376	class.Actinobacteria.id.419	1	207000060	rs908704	A	G	0.066437436	0.013431203	4.970999267	6.66E-07	16307	24
377	class.Actinobacteria.id.419	2	136929076	rs16833170	A	G	0.061543305	0.012237556	5.070744073	3.96E-07	16313	24
378	class.Actinobacteria.id.419	1	206995478	rs6685379	A	G	0.066111302	0.01334903	4.98692789	6.13E-07	16182	23
379	class.Actinobacteria.id.419	2	136806218	rs2090661	A	G	0.061686878	0.012311555	4.986524554	6.15E-07	16309	24
380	class.Actinobacteria.id.419	2	136435526	rs2254780	C	T	0.071455242	0.0147411	4.865358142	1.14E-06	16313	24
381	class.Actinobacteria.id.419	2	136822223	rs1879087	T	C	0.10374985	0.022927037	4.98495064	6.20E-07	10415	19
382	class.Actinobacteria.id.419	2	136435736	rs2441384	T	C	0.071210315	0.014740897	4.849940687	1.23E-06	16313	24
383	class.Actinobacteria.id.419	1	206994404	rs2138992	C	A	0.065942422	0.013520792	4.91401405	8.92E-07	16182	23
384	class.Actinobacteria.id.419	2	136761853	rs309122	A	G	0.073496542	0.014593582	4.981962392	6.29E-07	16312	24
385	class.Actinobacteria.id.419	2	135758520	rs11895609	A	T	0.076304402	0.015978935	5.016177331	5.27E-07	16312	24
386	class.Actinobacteria.id.419	2	135762061	rs6712127	A	G	0.071597835	0.013991335	4.946503772	7.56E-07	16313	24
387	class.Actinobacteria.id.419	2	136761175	rs309123	C	G	0.073955903	0.014800355	4.965163203	6.86E-07	16312	24
388	class.Actinobacteria.id.419	16	81776768	rs8047955	G	A	0.05758155	0.011676216	4.92730228	8.34E-07	16306	24
389	class.Actinobacteria.id.419	16	81777336	rs8057441	T	C	0.056952201	0.011597417	4.901500203	9.51E-07	16182	23
390	class.Actinobacteria.id.419	2	136799609	rs10928554	C	T	0.089761073	0.017433196	4.854055707	1.21E-06	16182	23
391	class.Actinobacteria.id.419	1	206991253	rs4440852	A	C	0.065021075	0.01352255	4.849898581	1.24E-06	16182	23
392	class.Actinobacteria.id.419	2	136657252	rs309152	T	C	0.073759053	0.015038788	4.912145979	9.01E-07	16313	24
393	class.Actinobacteria.id.419	2	136682486	rs75667274	C	T	0.076565464	0.015559487	4.88571459	1.03E-06	16307	24
394	class.Actinobacteria.id.419	2	136854537	rs6430601	G	T	0.076039656	0.016151291	4.879616576	1.06E-06	16310	24
395	class.Actinobacteria.id.419	2	136695694	rs112407062	C	T	0.076095607	0.015477611	4.885999372	1.03E-06	16313	24
396	class.Actinobacteria.id.419	13	112859829	rs7322849	C	T	0.094446681	0.019297598	4.984633521	6.21E-07	16313	24
397	class.Actinobacteria.id.419	2	135760244	rs6713776	C	G	0.074308483	0.014608174	4.84529599	1.26E-06	16313	24
398	class.Actinobacteria.id.419	2	136921703	rs10180515	T	A	0.063997605	0.013392366	4.893938678	9.88E-07	16313	24
399	class.Actinobacteria.id.419	16	81777833	rs12448146	C	A	0.055851601	0.011559977	4.842948098	1.28E-06	16182	23
400	class.Actinobacteria.id.419	1	206999963	rs908703	C	G	0.063290346	0.013256981	4.823880731	1.41E-06	16307	24
401	class.Actinobacteria.id.419	2	136692893	rs115553816	G	A	0.075762751	0.015481588	4.862273019	1.16E-06	16313	24
402	class.Actinobacteria.id.419	2	135498924	rs1942055	G	C	0.056412852	0.01157774	4.996825934	5.83E-07	16308	24
403	class.Actinobacteria.id.419	2	136924156	rs11684458	A	G	0.063687814	0.013394563	4.884321682	1.04E-06	16313	24
404	class.Actinobacteria.id.419	2	136710372	rs309119	T	C	0.072700128	0.014972698	4.874957943	1.09E-06	16313	24
405	class.Actinobacteria.id.419	2	136686114	rs112396243	C	T	0.075701795	0.015472923	4.857584574	1.19E-06	16313	24
406	class.Actinobacteria.id.419	2	136751842	rs309133	A	C	0.072887474	0.014911517	4.879755466	1.06E-06	16311	24
407	class.Actinobacteria.id.419	2	136923693	rs2176716	C	T	0.063548859	0.013394115	4.871205552	1.11E-06	16313	24
408	class.Actinobacteria.id.419	2	136754183	rs16832440	G	A	0.075900063	0.015463353	4.84373987	1.27E-06	16312	24
409	class.Actinobacteria.id.419	2	136653848	rs111682961	C	T	0.075482057	0.015477273	4.834522429	1.33E-06	16312	24
410	class.Actinobacteria.id.419	2	136670419	rs79826902	G	A	0.075459163	0.015474707	4.837526881	1.31E-06	16313	24
411	class.Actinobacteria.id.419	2	136702118	rs12474975	A	T	0.075177524	0.015479228	4.836652631	1.32E-06	16313	24
412	class.Actinobacteria.id.419	2	136672678	rs3098104	T	A	0.075702992	0.015296684	4.847985026	1.25E-06	16312	24
413	class.Actinobacteria.id.419	2	136701539	rs16832243	C	T	0.075122128	0.015480476	4.826849669	1.39E-06	16313	24
414	class.Actinobacteria.id.419	2	136765074	rs1964459	C	G	0.075768282	0.015470687	4.828474182	1.38E-06	16309	24
415	class.Actinobacteria.id.419	2	136684632	rs16832205	G	A	0.075165332	0.015475092	4.82391708	1.41E-06	16313	24
416	class.Actinobacteria.id.419	2	136635343	rs6728946	C	G	0.072523601	0.015087166	4.793215695	1.64E-06	16312	24
417	class.Actinobacteria.id.419	2	136663110	rs12464050	G	T	0.075284265	0.015485979	4.820330426	1.43E-06	16312	24
418	class.Actinobacteria.id.419	2	136684940	rs309159	C	T	0.072550794	0.015113892	4.817169384	1.46E-06	16313	24
419	class.Actinobacteria.id.419	2	136793114	rs4954555	T	C	0.107413685	0.022460814	4.818715101	1.44E-06	11290	20
420	class.Actinobacteria.id.419	2	136423904	rs2289959	C	T	0.068625385	0.0147396	4.683832746	2.82E-06	16313	24
421	class.Actinobacteria.id.419	2	136652491	rs586964	G	A	0.074924966	0.015420069	4.808906206	1.52E-06	16312	24
422	class.Actinobacteria.id.419	2	136646582	rs59213715	A	C	0.073892813	0.015412714	4.78200401	1.74E-06	16313	24
423	class.Actinobacteria.id.419	2	136817769	rs75128007	A	G	0.06367738	0.012978528	4.810745651	1.50E-06	16182	23
424	class.Actinobacteria.id.419	2	136797273	rs62160866	A	G	0.118424627	0.025409684	4.810420808	1.51E-06	9647	17
425	class.Actinobacteria.id.419	2	136922932	rs13387501	C	T	0.063098947	0.013394182	4.837872465	1.31E-06	16313	24
426	class.Actinobacteria.id.419	2	136691737	rs41269821	A	G	0.072748749	0.015175912	4.802806617	1.56E-06	16307	24
427	class.Actinobacteria.id.419	2	136748779	rs721765	C	A	0.075509176	0.015467886	4.812780875	1.49E-06	16313	24
428	class.Actinobacteria.id.419	2	137051974	rs72847650	C	A	-0.055989067	0.011827629	-4.851479318	1.23E-06	15401	22
429	class.Actinobacteria.id.419	2	136688749	rs309161	G	A	0.072359871	0.014971751	4.822262245	1.42E-06	16313	24
430	class.Actinobacteria.id.419	2	136692553	rs6711493	A	G	0.070519065	0.014635025	4.823966908	1.41E-06	16313	24
431	class.Actinobacteria.id.419	2	136663605	rs77096272	C	A	0.074963091	0.015486087	4.798159889	1.60E-06	16312	24
432	class.Actinobacteria.id.419	2	136763242	rs12476127	A	G	0.073620137	0.015091356	4.811206007	1.50E-06	16313	24
433	class.Actinobacteria.id.419	2	136922672	rs6711997	T	C	0.062734549	0.013370294	4.822052725	1.42E-06	16313	24
434	class.Actinobacteria.id.419	2	136792923	rs4245838	C	T	0.106844208	0.022457726	4.794038235	1.63E-06	11290	20
435	class.Actinobacteria.id.419	2	136672775	rs309170	C	T	0.071750064	0.014920528	4.809069988	1.52E-06	16313	24
436	class.Actinobacteria.id.419	2	136652524	rs499483	G	A	0.074421593	0.015410746	4.781753188	1.74E-06	16312	24
437	class.Actinobacteria.id.419	16	81777808	rs9926823	A	C	0.054622833	0.011552818	4.742577743	2.11E-06	16182	23
438	class.Actinobacteria.id.419	2	136817658	rs16832624	T	C	0.06206364	0.0129301	4.75161766	2.02E-06	16182	23
439	class.Actinobacteria.id.419	2	136656094	rs3098103	T	C	0.074502968	0.01543435	4.772766767	1.82E-06	16313	24
440	class.Actinobacteria.id.419	2	136665711	rs75753154	T	C	0.072194475	0.01508763	4.778759545	1.76E-06	16313	24
441	class.Actinobacteria.id.419	2	136708787	rs309120	G	C	0.070977114	0.014920224	4.782510451	1.73E-06	16313	24
442	class.Actinobacteria.id.419	2	136633962	rs1057031	G	A	0.071542869	0.015047097	4.740513532	2.13E-06	16312	24
443	class.Actinobacteria.id.419	2	136668123	rs7606267	T	C	0.072027068	0.015087961	4.770447848	1.84E-06	16313	24
444	class.Actinobacteria.id.419	2	136960483	rs11688302	C	T	0.058303249	0.012242441	4.789744876	1.67E-06	16313	24
445	class.Actinobacteria.id.419	2	136796019	rs57243841	A	G	0.063415647	0.013220411	4.745317938	2.08E-06	16182	23
446	class.Actinobacteria.id.419	2	135446390	rs10171677	G	A	0.055080945	0.011490534	4.927330537	8.34E-07	16182	23
447	class.Actinobacteria.id.419	2	136680534	rs309158	A	G	0.070047937	0.014584872	4.787875479	1.69E-06	16313	24
448	class.Actinobacteria.id.419	16	81777841	rs9939612	C	T	0.054725043	0.011559839	4.74441448	2.09E-06	16182	23
449	class.Actinobacteria.id.419	2	136622543	rs3087343	T	G	0.072157232	0.015164064	4.731209537	2.23E-06	16312	24
450	class.Actinobacteria.id.419	2	136805401	rs4954557	C	T	0.059103289	0.012436737	4.758727689	1.95E-06	16313	24
451	class.Actinobacteria.id.419	2	136667487	rs309166	C	T	0.071277764	0.014921977	4.775470022	1.79E-06	16312	24
452	class.Actinobacteria.id.419	2	136686393	rs177917	A	G	0.071332078	0.014910352	4.774933085	1.80E-06	16313	24
453	class.Actinobacteria.id.419	2	136665162	rs16832162	T	A	0.071869008	0.015087605	4.755923553	1.98E-06	16313	24
454	class.Actinobacteria.id.419	15	94852795	rs72767435	C	T	-0.126352156	0.027362598	-4.702651659	2.57E-06	12898	16
455	class.Actinobacteria.id.419	22	35558300	rs134296	A	C	0.111964144	0.02341668	4.823118468	1.41E-06	14302	20
456	class.Actinobacteria.id.419	1	206991401	rs2883034	A	G	0.061744733	0.013326684	4.699551095	2.61E-06	16182	23
457	class.Actinobacteria.id.419	2	136440300	rs7599898	C	T	0.070447621	0.015058265	4.610396021	4.02E-06	16313	24
458	class.Actinobacteria.id.419	2	136694905	rs7573555	T	C	0.071629674	0.015093275	4.743105594	2.10E-06	16313	24
459	class.Actinobacteria.id.419	22	35567355	rs134366	A	G	0.111876589	0.023500975	4.810666	1.50E-06	14302	20
460	class.Actinobacteria.id.419	2	135826463	rs62168955	C	T	0.244957611	0.049979116	4.739891834	2.14E-06	3450	9
461	class.Actinobacteria.id.419	12	20378911	rs10841473	C	G	-0.058376469	0.012335331	-4.700630378	2.59E-06	16311	24
462	class.Actinobacteria.id.419	2	136746224	rs309118	G	C	0.070311731	0.014627768	4.762541212	1.91E-06	16312	24
463	class.Actinobacteria.id.419	5	475408	rs11745923	T	G	0.056375863	0.011552908	4.800675625	1.58E-06	16312	24
464	class.Actinobacteria.id.419	2	136640101	rs78364332	T	C	0.07126105	0.015087979	4.707427832	2.51E-06	16312	24
465	class.Actinobacteria.id.419	2	136654833	rs3098102	C	T	0.070896962	0.014917276	4.750423631	2.03E-06	16313	24
466	class.Actinobacteria.id.419	22	35567715	rs134372	T	A	0.111851211	0.023500546	4.804342163	1.55E-06	14302	20
467	class.Actinobacteria.id.419	5	502594	rs11738544	G	A	0.055031092	0.011501729	4.698248492	2.62E-06	16182	23
468	class.Actinobacteria.id.419	2	136702601	rs6743537	G	A	0.072964906	0.015227899	4.750880519	2.03E-06	16313	24
469	class.Actinobacteria.id.419	2	136429857	rs1438303	C	T	0.070093762	0.015054372	4.594956472	4.33E-06	16313	24
470	class.Actinobacteria.id.419	2	136751488	rs10496738	C	T	0.074324689	0.015474847	4.734948504	2.19E-06	16313	24
471	class.Actinobacteria.id.419	2	136438517	rs76380759	G	A	0.07023249	0.015060016	4.594506863	4.34E-06	16313	24
472	class.Actinobacteria.id.419	2	136669264	rs309167	C	T	0.073337947	0.015405303	4.723943977	2.31E-06	16313	24
473	class.Actinobacteria.id.419	16	81776276	rs10871420	A	G	0.054922936	0.011628321	4.718231855	2.38E-06	16313	24
474	class.Actinobacteria.id.419	2	136648883	rs2839740	G	T	0.073393898	0.015466637	4.716829043	2.40E-06	16312	24
475	class.Actinobacteria.id.419	2	136667301	rs309165	T	C	0.069377085	0.0145865	4.745411156	2.08E-06	16313	24
476	class.Actinobacteria.id.419	2	136672680	rs56100046	T	A	0.073735829	0.015492644	4.734033713	2.20E-06	16312	24
477	class.Actinobacteria.id.419	2	136695705	rs113974791	T	G	0.071319837	0.015093374	4.72414326	2.31E-06	16313	24
478	class.Actinobacteria.id.419	22	35560330	rs7410699	G	C	0.111347813	0.023473021	4.793810357	1.64E-06	14302	20
479	class.Actinobacteria.id.419	16	81775380	rs4889375	A	C	0.054657677	0.011570678	4.710659682	2.47E-06	16182	23
480	class.Actinobacteria.id.419	2	136563284	rs79954860	A	T	0.108776457	0.023154023	4.722742788	2.33E-06	13514	21
481	class.Actinobacteria.id.419	16	81776815	rs11859935	G	A	0.055280576	0.011716997	4.708326101	2.50E-06	16307	24
482	class.Actinobacteria.id.419	2	136690783	rs309162	T	A	0.071167287	0.015027075	4.72123981	2.34E-06	16313	24
483	class.Actinobacteria.id.419	2	136696608	rs112758679	A	C	0.071245465	0.015093369	4.721110619	2.35E-06	16313	24
484	class.Actinobacteria.id.419	22	35566469	rs134363	A	G	0.111577996	0.023506212	4.790109229	1.67E-06	14302	20
485	class.Actinobacteria.id.419	22	35557437	rs134286	G	A	0.110854964	0.023469962	4.789785532	1.67E-06	14302	20
486	class.Actinobacteria.id.419	2	136618507	rs4988201	A	G	0.071538948	0.015181297	4.688884446	2.75E-06	16312	24
487	class.Actinobacteria.id.419	22	35562147	rs134331	C	G	0.111422056	0.023515073	4.768577112	1.86E-06	14302	20
488	class.Actinobacteria.id.419	2	136437615	rs3769016	A	G	0.070051254	0.015059939	4.583527501	4.57E-06	16313	24
489	class.Actinobacteria.id.419	2	136653925	rs614193	A	T	0.07063687	0.014920201	4.730426917	2.24E-06	16312	24
490	class.Actinobacteria.id.419	2	136640787	rs7561565	T	G	0.070781734	0.015029378	4.685679754	2.79E-06	16312	24
491	class.Actinobacteria.id.419	22	35562148	rs134332	A	G	0.111167039	0.023514907	4.763164504	1.91E-06	14302	20
492	class.Actinobacteria.id.419	2	136673546	rs309171	G	C	0.070900441	0.015025446	4.71329366	2.44E-06	16313	24
493	class.Actinobacteria.id.419	10	126110032	rs1515761	C	T	0.076231731	0.016988402	4.566319462	4.96E-06	15525	23
494	class.Actinobacteria.id.419	2	136818719	rs2090660	C	T	0.062485876	0.013016746	4.733020534	2.21E-06	16182	23
495	class.Actinobacteria.id.419	22	35567561	rs134371	C	T	0.111162433	0.023500762	4.77931241	1.76E-06	14302	20
496	class.Actinobacteria.id.419	22	35562235	rs134333	A	G	0.111232361	0.023515147	4.759183084	1.94E-06	14302	20
497	class.Actinobacteria.id.419	16	81784359	rs12935228	A	G	0.054144977	0.011542834	4.702728459	2.57E-06	16182	23
498	class.Actinobacteria.id.419	2	136723504	rs660002	C	T	0.068925893	0.014582849	4.718860512	2.37E-06	16313	24
499	class.Actinobacteria.id.419	2	136820854	rs4954558	A	G	0.061532651	0.012934989	4.707869614	2.50E-06	16182	23
500	class.Actinobacteria.id.419	22	35560258	rs134316	A	G	0.110445109	0.023473288	4.773139122	1.81E-06	14302	20
501	class.Actinobacteria.id.419	2	136641593	rs7581814	C	G	0.070696791	0.015088191	4.672238583	2.98E-06	16312	24
502	class.Actinobacteria.id.419	2	135481278	rs6756200	T	C	0.055197342	0.011451707	4.856172373	1.20E-06	16182	23
503	class.Actinobacteria.id.419	22	35559579	rs2413305	G	A	0.111092286	0.023510147	4.76878251	1.85E-06	14302	20
504	class.Actinobacteria.id.419	22	35559925	rs2413308	G	T	0.11032424	0.023467984	4.768768747	1.85E-06	14302	20
505	class.Actinobacteria.id.419	22	35558870	rs134307	C	T	0.110407313	0.023468241	4.768522869	1.86E-06	14302	20
506	class.Actinobacteria.id.419	2	136436317	rs6753232	T	C	0.069568485	0.015058242	4.564700302	5.00E-06	16313	24
507	class.Actinobacteria.id.419	22	35559695	rs2413306	A	G	0.110267153	0.02346797	4.76764909	1.86E-06	14302	20
508	class.Actinobacteria.id.419	2	136806996	rs80261410	T	C	0.06202297	0.012989568	4.677204423	2.91E-06	16182	23
509	class.Actinobacteria.id.419	2	136656534	rs3099428	C	G	0.070323065	0.014913839	4.708910384	2.49E-06	16313	24
510	class.Actinobacteria.id.419	2	136656536	rs3099427	A	G	0.070325084	0.014914442	4.708592098	2.49E-06	16313	24
511	class.Actinobacteria.id.419	16	81777543	rs12928452	C	A	0.053683753	0.011501169	4.67814695	2.89E-06	16307	24
512	class.Actinobacteria.id.419	2	136815388	rs1960171	C	T	0.05903419	0.012456249	4.668834141	3.03E-06	16182	23
513	class.Actinobacteria.id.419	22	35560444	rs134317	G	A	0.110412034	0.023451383	4.762439894	1.91E-06	14302	20
514	class.Actinobacteria.id.419	2	136974687	rs2176718	A	G	0.057391301	0.012230594	4.712355546	2.45E-06	16309	24
515	class.Actinobacteria.id.419	22	35558249	rs134294	A	T	0.109988506	0.02346445	4.762091608	1.92E-06	14302	20
516	class.Actinobacteria.id.419	2	136547067	rs73958638	A	G	0.106080949	0.023167791	4.692659699	2.70E-06	12433	21
517	class.Actinobacteria.id.419	2	136638113	rs79176913	C	A	0.070631019	0.015087523	4.661500837	3.14E-06	16312	24
518	class.Actinobacteria.id.419	22	35560386	rs6518933	A	G	0.110296486	0.023473294	4.760766694	1.93E-06	14302	20
519	class.Actinobacteria.id.419	2	137602926	rs1961273	T	C	0.060296939	0.0126047	4.780067332	1.75E-06	16313	24
520	class.Actinobacteria.id.419	5	477634	rs4334924	G	A	0.056644467	0.011634586	4.765981635	1.88E-06	16308	24
521	class.Actinobacteria.id.419	2	136652953	rs503227	T	C	0.070937261	0.015168222	4.681356479	2.85E-06	16312	24
522	class.Actinobacteria.id.419	22	35558292	rs134295	C	T	0.10970886	0.023464367	4.758074848	1.95E-06	14302	20
523	class.Actinobacteria.id.419	2	136628121	rs4988163	G	T	0.070990236	0.015172071	4.657552169	3.20E-06	16312	24
524	class.Actinobacteria.id.419	2	136994454	rs11678502	T	C	0.05544157	0.011621742	4.746805438	2.07E-06	16313	24
525	class.Actinobacteria.id.419	2	136715324	rs309142	T	C	0.068632643	0.014580274	4.708605229	2.49E-06	16313	24
526	class.Actinobacteria.id.419	2	136648077	rs12472293	T	C	0.070381772	0.01500396	4.685400739	2.79E-06	16313	24
527	class.Actinobacteria.id.419	2	136618178	rs61253125	T	C	0.070894183	0.015179363	4.648393626	3.35E-06	16312	24
528	class.Actinobacteria.id.419	22	35558827	rs134306	G	A	0.109952787	0.02346872	4.747633557	2.06E-06	14302	20
529	class.Actinobacteria.id.419	10	126086730	rs2459217	A	G	0.080242753	0.017882657	4.542700216	5.55E-06	15420	22
530	class.Actinobacteria.id.419	2	136991517	rs12986776	G	C	0.055355285	0.011624003	4.733636311	2.21E-06	16313	24
531	class.Actinobacteria.id.419	2	136700024	rs309150	T	A	0.070427325	0.015028759	4.676043685	2.92E-06	16313	24
532	class.Actinobacteria.id.419	22	35559966	rs2413309	A	G	0.109313441	0.023466845	4.745700373	2.08E-06	14302	20
533	class.Actinobacteria.id.419	2	136674028	rs309172	A	G	0.068628471	0.014804031	4.676016351	2.93E-06	16313	24
534	class.Actinobacteria.id.419	22	35560072	rs134311	G	A	0.109522517	0.023462491	4.74344762	2.10E-06	14302	20
535	class.Actinobacteria.id.419	2	136711064	rs3112496	C	T	0.069540729	0.014920036	4.686045043	2.79E-06	16313	24
536	class.Actinobacteria.id.419	22	35557844	rs134289	C	A	0.10957664	0.023464095	4.74144251	2.12E-06	14302	20
537	class.Actinobacteria.id.419	16	81778449	rs4888172	G	A	0.053574458	0.011546537	4.648019702	3.35E-06	16182	23
538	class.Actinobacteria.id.419	2	136444185	rs59413285	G	T	0.069117806	0.015067515	4.536087565	5.73E-06	16313	24
539	class.Actinobacteria.id.419	2	136707480	rs6750549	A	G	0.071100451	0.015200615	4.667712304	3.05E-06	16182	23
540	class.Actinobacteria.id.419	22	35559017	rs134308	C	T	0.109477967	0.02346814	4.736918999	2.17E-06	14302	20
541	class.Actinobacteria.id.419	2	136443900	rs62168830	A	T	0.069019752	0.015069056	4.529939125	5.90E-06	16313	24
542	class.Actinobacteria.id.419	2	136444338	rs57530667	A	G	0.069019588	0.015068482	4.529939125	5.90E-06	16313	24
543	class.Actinobacteria.id.419	22	35559994	rs2413310	A	T	0.109070893	0.023466942	4.733486676	2.21E-06	14302	20
544	class.Actinobacteria.id.419	2	136612036	rs111837148	G	A	0.070724495	0.015179639	4.631190432	3.64E-06	16312	24
545	class.Actinobacteria.id.419	2	136376515	rs4954272	A	G	0.078953156	0.016743588	4.782960034	1.73E-06	16313	24
546	class.Actinobacteria.id.419	2	136655582	rs3099429	T	A	0.070477527	0.015159404	4.650166676	3.32E-06	16313	24
547	class.Actinobacteria.id.419	22	35558112	rs134293	C	T	0.109014471	0.023464458	4.722581673	2.33E-06	14302	20
548	class.Actinobacteria.id.419	2	136624947	rs1435577	C	G	0.070436255	0.015167476	4.620327151	3.83E-06	16312	24
549	class.Actinobacteria.id.419	22	35557708	rs134288	C	G	0.109146308	0.023464633	4.714688651	2.42E-06	14302	20
550	class.Actinobacteria.id.419	22	35558414	rs134300	G	A	0.108760668	0.023463389	4.713499584	2.43E-06	14302	20
551	class.Actinobacteria.id.419	22	35558662	rs134301	T	C	0.108812814	0.023463824	4.713102365	2.44E-06	14302	20
552	class.Actinobacteria.id.419	22	35558018	rs134290	C	G	0.108728029	0.023464423	4.712730839	2.44E-06	14302	20
553	class.Actinobacteria.id.419	22	35558038	rs134291	G	A	0.108728029	0.023464423	4.712730839	2.44E-06	14302	20
554	class.Actinobacteria.id.419	22	35557302	rs134285	T	C	0.109000424	0.02347604	4.710895391	2.47E-06	14302	20
555	class.Actinobacteria.id.419	2	136625113	rs4594504	A	C	0.070296028	0.015167651	4.611342237	4.00E-06	16312	24
556	class.Actinobacteria.id.419	16	81778491	rs4888173	A	G	0.053201155	0.011545055	4.617469494	3.88E-06	16182	23
557	class.Actinobacteria.id.419	15	49208992	rs12899991	T	A	0.071992324	0.015466108	4.609923242	4.03E-06	16182	23
558	class.Actinobacteria.id.419	2	136449254	rs62168833	G	A	0.068729651	0.015070027	4.499534479	6.81E-06	16313	24
559	class.Actinobacteria.id.419	2	136710554	rs895285	A	G	0.071540414	0.015471438	4.618096744	3.87E-06	16313	24
560	class.Actinobacteria.id.419	22	35557509	rs134287	A	C	0.108731689	0.023471183	4.69369116	2.68E-06	14302	20
561	class.Actinobacteria.id.419	22	35560726	rs134323	A	C	0.109551677	0.023521488	4.688790685	2.75E-06	14302	20
562	class.Actinobacteria.id.419	22	35558057	rs134292	A	G	0.108298013	0.023464411	4.684758468	2.80E-06	14302	20
563	class.Actinobacteria.id.419	22	35559067	rs134309	G	A	0.108131493	0.023462179	4.668534672	3.03E-06	14302	20
564	class.Actinobacteria.id.419	22	35558724	rs134304	T	C	0.108290435	0.023469372	4.68064734	2.86E-06	14302	20
565	class.Actinobacteria.id.419	22	35558770	rs134305	G	A	0.108448458	0.023469353	4.679006293	2.88E-06	14302	20
566	class.Actinobacteria.id.419	16	81776056	rs4312299	G	C	0.05369245	0.011638987	4.621476782	3.81E-06	16308	24
567	class.Actinobacteria.id.419	2	136652045	rs139939202	G	A	0.072343357	0.015495347	4.59480208	4.33E-06	16311	24
568	class.Actinobacteria.id.419	22	35559078	rs134310	T	A	0.108060366	0.023468229	4.676369006	2.92E-06	14302	20
569	class.Actinobacteria.id.419	2	136822267	rs4954559	A	G	0.060151226	0.012906069	4.621936607	3.80E-06	16182	23
570	class.Actinobacteria.id.419	5	418839	rs72711368	C	T	0.054828996	0.011772574	4.608438603	4.06E-06	16182	23
571	class.Actinobacteria.id.419	16	81777978	rs11150406	T	C	0.052804292	0.011535022	4.581986504	4.61E-06	16182	23
572	class.Actinobacteria.id.419	2	136413244	rs7607920	T	C	0.067865383	0.015056929	4.467537161	7.91E-06	16313	24
573	class.Actinobacteria.id.419	2	136726567	rs309154	C	T	0.071291829	0.01540157	4.592157874	4.39E-06	16313	24
574	class.Actinobacteria.id.419	22	35558709	rs134302	T	C	0.108070189	0.023469414	4.668327442	3.04E-06	14302	20
575	class.Actinobacteria.id.419	1	114665485	rs12049045	G	A	0.05104521	0.01143249	4.449021983	8.63E-06	16311	24
576	class.Actinobacteria.id.419	22	35556599	rs134282	A	G	0.108093755	0.023494177	4.666275635	3.07E-06	14302	20
577	class.Actinobacteria.id.419	22	35562850	rs134339	G	A	0.108967595	0.023516903	4.662690161	3.12E-06	14302	20
578	class.Actinobacteria.id.419	2	135372951	rs35564151	A	G	0.053890021	0.01148858	4.76683796	1.87E-06	16182	23
579	class.Actinobacteria.id.419	2	161611969	rs1376754	A	G	0.050924155	0.011250292	4.502564005	6.71E-06	16182	23
580	class.Actinobacteria.id.419	22	35570816	rs2413312	G	A	0.108329179	0.023497256	4.656177701	3.22E-06	14302	20
581	class.Actinobacteria.id.419	2	136412270	rs34007021	C	T	0.067624793	0.015058998	4.450280841	8.58E-06	16313	24
582	class.Actinobacteria.id.419	2	136467119	rs2304366	C	T	0.067707078	0.015082303	4.447714765	8.68E-06	16313	24
583	class.Actinobacteria.id.419	5	476353	rs2230437	C	T	0.054018103	0.011427446	4.652796724	3.27E-06	16312	24
584	class.Actinobacteria.id.419	2	136934529	rs11674937	G	C	0.060412038	0.013445791	4.623282532	3.78E-06	16313	24
585	class.Actinobacteria.id.419	17	75348675	rs11655079	C	T	-0.056067443	0.01242856	-4.529043738	5.93E-06	16309	24
586	class.Actinobacteria.id.419	2	161705703	rs6432655	G	A	0.050419626	0.011190375	4.486738547	7.23E-06	16313	24
587	class.Actinobacteria.id.419	22	35569619	rs134377	G	A	0.108262129	0.023512977	4.645132651	3.40E-06	14302	20
588	class.Actinobacteria.id.419	22	35573334	.	C	T	0.11504712	0.0245463	4.642680624	3.44E-06	14302	20
589	class.Actinobacteria.id.419	2	136588031	rs73957037	C	A	0.068291947	0.014730234	4.542792472	5.55E-06	16311	24
590	class.Actinobacteria.id.419	22	35568075	rs134373	C	T	0.107818928	0.023498196	4.642234097	3.45E-06	14302	20
591	class.Actinobacteria.id.419	2	137014023	rs4072434	G	C	0.054463936	0.011618787	4.651899945	3.29E-06	16313	24
592	class.Actinobacteria.id.419	2	136863816	rs7569447	A	C	0.071620056	0.016114013	4.572036146	4.83E-06	16313	24
593	class.Actinobacteria.id.419	22	35568399	rs134374	T	C	0.107996986	0.023502709	4.639056771	3.50E-06	14302	20
594	class.Actinobacteria.id.419	2	136732772	rs309157	G	A	0.070931505	0.015405539	4.582112195	4.60E-06	16313	24
595	class.Actinobacteria.id.419	2	137013901	rs4072435	T	C	0.054305613	0.011618841	4.644892054	3.40E-06	16313	24
596	class.Actinobacteria.id.419	2	137013606	rs10221893	T	C	0.054229188	0.011618968	4.642407397	3.44E-06	16313	24
597	class.Actinobacteria.id.419	2	136413847	rs12467569	T	C	0.067195282	0.015053895	4.428805008	9.48E-06	16313	24
598	class.Actinobacteria.id.419	22	35569422	rs134376	A	G	0.107930236	0.023507841	4.63083589	3.64E-06	14302	20
599	class.Actinobacteria.id.419	22	35571497	rs134381	C	T	0.107444493	0.023571321	4.628565109	3.68E-06	14302	20
600	class.Actinobacteria.id.419	16	81783829	rs5001584	G	A	0.052421757	0.011659928	4.51941369	6.20E-06	16182	23
601	class.Actinobacteria.id.419	2	136626078	rs3769001	A	G	0.068973845	0.015169343	4.524230696	6.06E-06	16312	24
602	class.Actinobacteria.id.419	2	136725459	rs75524146	C	T	0.070737741	0.015474052	4.553339197	5.28E-06	16313	24
603	class.Actinobacteria.id.419	2	136737460	rs309113	C	A	0.068191316	0.014916543	4.586766431	4.50E-06	16312	24
605	class.Actinobacteria.id.419	5	475463	rs11743825	C	T	0.054387599	0.011561705	4.624637504	3.75E-06	16313	24
606	class.Actinobacteria.id.419	22	35563904	rs134347	C	T	0.107621418	0.023495425	4.618987847	3.86E-06	14302	20
607	class.Actinobacteria.id.419	2	136451676	rs12465544	C	T	0.067462439	0.015068502	4.423655232	9.70E-06	16313	24
608	class.Actinobacteria.id.419	22	35575744	rs134391	C	T	0.106749059	0.023548736	4.616626648	3.90E-06	14302	20
609	class.Actinobacteria.id.419	22	35556785	rs134283	G	A	0.107127495	0.023490192	4.616644179	3.90E-06	14302	20
610	class.Actinobacteria.id.419	22	35573370	rs134385	T	C	0.114214119	0.024546454	4.612378878	3.98E-06	14302	20
611	class.Actinobacteria.id.419	22	35572598	rs134383	A	G	0.114384977	0.024546254	4.609863176	4.03E-06	14302	20
612	class.Actinobacteria.id.419	2	136600662	rs4988274	T	A	0.069767682	0.01538938	4.50753186	6.56E-06	16182	23
613	class.Actinobacteria.id.419	16	81774798	rs12446319	T	C	0.05124838	0.011271679	4.554898408	5.24E-06	16313	24
614	class.Actinobacteria.id.419	22	35574275	rs134387	T	C	0.106496347	0.023566709	4.608745296	4.05E-06	14302	20
615	class.Actinobacteria.id.419	22	35560036	rs2413311	C	T	0.106448536	0.023709191	4.608127451	4.06E-06	14302	20
616	class.Actinobacteria.id.419	22	35576731	rs134396	G	T	0.105611836	0.023545422	4.605958831	4.11E-06	14302	20
619	class.Actinobacteria.id.419	2	135719132	rs6708336	T	A	0.052110906	0.011362279	4.633051677	3.60E-06	16313	24
621	class.Actinobacteria.id.419	2	136571852	rs60253740	G	T	0.070207633	0.015215911	4.502718473	6.71E-06	16182	23
622	class.Actinobacteria.id.419	22	35578104	rs134400	G	A	0.105537117	0.023540871	4.597362936	4.28E-06	14302	20
623	class.Actinobacteria.id.419	2	135711516	rs3814355	C	T	0.052039109	0.011377775	4.634623604	3.58E-06	16313	24
625	class.Actinobacteria.id.419	2	161608676	rs11682960	C	T	0.050023292	0.011207054	4.441808983	8.92E-06	16307	24
626	class.Actinobacteria.id.419	22	35580096	rs134409	G	A	0.105631933	0.023552464	4.594880444	4.33E-06	14302	20
627	class.Actinobacteria.id.419	22	35580075	rs134408	A	G	0.105631933	0.023552464	4.594880444	4.33E-06	14302	20
628	class.Actinobacteria.id.419	22	35574163	rs108272	C	G	0.106181604	0.023572416	4.594684489	4.33E-06	14302	20
629	class.Actinobacteria.id.419	22	35579461	rs134407	G	A	0.11337255	0.02451893	4.594364736	4.34E-06	14302	20
630	class.Actinobacteria.id.419	2	135717997	rs62168897	C	T	0.052014512	0.011362892	4.623679935	3.77E-06	16312	24
631	class.Actinobacteria.id.419	22	35576018	rs134393	C	T	0.105455081	0.023546356	4.589939531	4.43E-06	14302	20
632	class.Actinobacteria.id.419	22	35577117	rs28579	G	C	0.10522292	0.023541009	4.589138874	4.45E-06	14302	20
633	class.Actinobacteria.id.419	22	35561916	rs134330	G	C	0.106765693	0.023516881	4.566117663	4.97E-06	14302	20
634	class.Actinobacteria.id.419	16	81775099	rs12931368	C	T	0.051059228	0.011274632	4.537955681	5.68E-06	16308	24
635	class.Actinobacteria.id.419	2	136560464	rs12475398	C	T	0.069128875	0.015190647	4.459080616	8.23E-06	16311	24
636	class.Actinobacteria.id.419	22	35575836	rs134392	C	T	0.105222805	0.023546469	4.584884322	4.54E-06	14302	20
638	class.Actinobacteria.id.419	2	135706758	rs2034261	G	T	0.052179413	0.011376668	4.638069111	3.52E-06	16313	24
640	class.Actinobacteria.id.419	2	136632300	rs4988145	A	C	0.068165094	0.015179631	4.478563017	7.51E-06	16312	24
641	class.Actinobacteria.id.419	2	137006198	rs6430612	T	C	0.053671523	0.011559678	4.588556106	4.46E-06	16313	24
642	class.Actinobacteria.id.419	2	136800195	rs72974159	C	T	0.059940221	0.013249934	4.487437334	7.21E-06	16182	23
643	class.Actinobacteria.id.419	2	136582809	rs2322813	A	G	0.069312686	0.01522332	4.477933634	7.54E-06	16310	24
644	class.Actinobacteria.id.419	5	18018467	rs6893855	A	C	-0.077144087	0.017356815	-4.443744238	8.84E-06	16312	24
645	class.Actinobacteria.id.419	5	18017755	rs7732645	T	C	-0.076314267	0.017357194	-4.42817777	9.50E-06	16313	24
646	class.Actinobacteria.id.419	22	35575648	rs134389	T	G	0.112762087	0.024520917	4.5751882	4.76E-06	14302	20
647	class.Actinobacteria.id.419	5	437586	rs55842567	G	A	0.054079945	0.011570192	4.550762734	5.35E-06	16312	24
648	class.Actinobacteria.id.419	2	136744678	rs16832417	C	T	0.070638491	0.01547554	4.506968469	6.58E-06	16313	24
649	class.Actinobacteria.id.419	2	136743143	rs2278682	G	C	0.067914978	0.014973957	4.537670033	5.69E-06	16312	24
651	class.Actinobacteria.id.419	2	137014611	rs13024450	T	C	0.053516684	0.01161655	4.574621302	4.77E-06	16313	24
652	class.Actinobacteria.id.419	22	35576041	rs134394	C	T	0.104614307	0.023546713	4.562717433	5.05E-06	14302	20
653	class.Actinobacteria.id.419	22	35576324	rs134395	C	A	0.104588963	0.023541428	4.562717433	5.05E-06	14302	20
655	class.Actinobacteria.id.419	5	18016946	rs1496374	G	A	-0.076664671	0.017365417	-4.435705119	9.18E-06	16312	24
656	class.Actinobacteria.id.419	5	418813	rs68005421	G	C	0.053627294	0.01177786	4.503786856	6.68E-06	16182	23
657	class.Actinobacteria.id.419	5	18019549	rs7700479	A	T	-0.076965305	0.017393272	-4.449139926	8.62E-06	16313	24
659	class.Actinobacteria.id.419	2	136586825	rs79633114	C	T	0.069102994	0.015228948	4.458286239	8.26E-06	16310	24
660	class.Actinobacteria.id.419	2	136719173	rs6430594	A	G	0.068054679	0.015084877	4.483762294	7.33E-06	16312	24
661	class.Actinobacteria.id.419	2	135711657	rs3814354	G	A	0.051689938	0.011360573	4.592267218	4.38E-06	16313	24
662	class.Actinobacteria.id.419	22	35561864	rs134329	G	A	0.106044128	0.023517105	4.532928312	5.82E-06	14302	20
663	class.Actinobacteria.id.419	2	136814109	rs1533649	G	A	0.058992087	0.012991318	4.460364016	8.18E-06	16182	23
664	class.Actinobacteria.id.419	8	65654844	rs80083040	G	T	0.155783797	0.034801661	4.449150685	8.62E-06	8003	11
666	class.Actinobacteria.id.419	5	442571	rs56146525	A	C	0.054088113	0.011540952	4.549958206	5.37E-06	16312	24
667	class.Actinobacteria.id.419	2	137007429	rs10200263	T	C	0.053143138	0.011576374	4.55504615	5.24E-06	16313	24
668	class.Actinobacteria.id.419	2	135710322	rs10166142	A	G	0.051677294	0.011360385	4.590762709	4.42E-06	16313	24
669	class.Actinobacteria.id.419	2	136593498	rs76097170	C	T	0.066855401	0.014899021	4.442896611	8.88E-06	16310	24
670	class.Actinobacteria.id.419	22	35548081	rs134268	T	C	0.10273883	0.023304552	4.48620518	7.25E-06	14300	20
671	class.Actinobacteria.id.419	22	35578415	rs134404	T	A	0.107457739	0.023967096	4.542955262	5.55E-06	14302	20
672	class.Actinobacteria.id.419	2	135720715	rs56271357	C	T	0.051491777	0.011362379	4.579597427	4.66E-06	16313	24
674	class.Actinobacteria.id.419	5	18015652	rs7721660	T	G	-0.076628113	0.017437833	-4.417769375	9.97E-06	16313	24
676	class.Actinobacteria.id.419	22	35584112	rs134416	G	A	0.104645782	0.023538894	4.537306842	5.70E-06	14302	20
677	class.Actinobacteria.id.419	7	95654718	rs961091	A	G	0.050125533	0.01125498	4.447787388	8.68E-06	16311	24
678	class.Actinobacteria.id.419	16	81777701	rs9937275	G	A	0.051875862	0.011695604	4.448865437	8.63E-06	16182	23
679	class.Actinobacteria.id.419	5	437542	rs56104584	T	C	0.053651613	0.011570786	4.513721611	6.37E-06	16312	24
680	class.Actinobacteria.id.419	5	444942	rs79931555	A	G	0.097425668	0.022040802	4.489781267	7.13E-06	14487	18
681	class.Actinobacteria.id.419	5	437667	rs56042615	G	A	0.053800874	0.011570842	4.523649864	6.08E-06	16312	24
682	class.Actinobacteria.id.419	22	35580597	rs134410	C	T	0.104099576	0.0235492	4.532006217	5.84E-06	14302	20
683	class.Actinobacteria.id.419	1	207016225	rs2243193	G	A	0.057511284	0.01287402	4.478943241	7.50E-06	16313	24
684	class.Actinobacteria.id.419	2	136593678	rs11895319	T	C	0.065199632	0.014700979	4.417696171	9.98E-06	16313	24
685	class.Actinobacteria.id.419	5	444810	rs72717432	G	A	0.053649977	0.01157885	4.536427179	5.72E-06	16182	23
686	class.Actinobacteria.id.419	5	446923	rs12187440	G	A	0.053212246	0.011532405	4.504692854	6.65E-06	16312	24
688	class.Actinobacteria.id.419	22	35584819	rs134419	T	C	0.112159731	0.024587147	4.527904377	5.96E-06	14302	20
690	class.Actinobacteria.id.419	2	135694848	rs4953938	G	A	0.051291593	0.011380559	4.57042592	4.87E-06	16313	24
691	class.Actinobacteria.id.419	22	35581181	rs134411	T	C	0.103975293	0.02354919	4.520069513	6.18E-06	14302	20
692	class.Actinobacteria.id.419	2	136617477	rs12474093	G	A	0.071572258	0.015924134	4.475468794	7.62E-06	16073	22
693	class.Actinobacteria.id.419	22	35584338	rs134417	C	A	0.104001026	0.023542033	4.516885591	6.28E-06	14302	20
694	class.Actinobacteria.id.419	2	137008235	rs13018756	T	C	0.05286943	0.011619353	4.523985266	6.07E-06	16313	24
698	class.Actinobacteria.id.419	2	135715957	rs1947112	A	G	0.051162289	0.011363377	4.549035666	5.39E-06	16312	24
699	class.Actinobacteria.id.419	5	442438	rs1056465	T	A	0.053685231	0.011540703	4.514767508	6.34E-06	16312	24
700	class.Actinobacteria.id.419	5	450102	rs6889494	C	T	0.053233114	0.011543074	4.51527196	6.32E-06	16312	24
701	class.Actinobacteria.id.419	2	136981210	rs10165053	T	C	0.053128107	0.011630653	4.526256725	6.00E-06	16310	24
702	class.Actinobacteria.id.419	5	542023	rs9800013	A	G	0.05983135	0.013882157	4.421941425	9.78E-06	16204	23
703	class.Actinobacteria.id.419	5	422178	rs11742144	G	A	0.053004737	0.011581873	4.496438454	6.91E-06	16313	24
710	class.Actinobacteria.id.419	2	136734569	rs78274583	C	T	0.069058102	0.015473723	4.441583491	8.93E-06	16313	24
711	class.Actinobacteria.id.419	1	207011485	rs2243174	A	G	0.057033582	0.012866478	4.44807044	8.66E-06	16312	24
715	class.Actinobacteria.id.419	2	136403994	rs77985886	C	T	0.087930421	0.019283635	4.484251068	7.32E-06	16313	24
716	class.Actinobacteria.id.419	16	81775039	rs58110576	C	A	0.052328573	0.011774231	4.437783954	9.09E-06	16182	23
718	class.Actinobacteria.id.419	5	449701	rs72717440	A	T	0.053056423	0.011542343	4.495033732	6.96E-06	16312	24
719	class.Actinobacteria.id.419	5	437862	rs34847072	G	C	0.053230253	0.011570165	4.476185382	7.60E-06	16312	24
720	class.Actinobacteria.id.419	2	135697557	rs10187990	A	G	0.050965452	0.01137898	4.538352801	5.67E-06	16313	24
722	class.Actinobacteria.id.419	2	136979530	rs28815269	A	G	0.052738682	0.011655991	4.507162102	6.57E-06	16182	23
726	class.Actinobacteria.id.419	2	136714178	rs309143	A	G	0.066732485	0.015024343	4.42332713	9.72E-06	16313	24
728	class.Actinobacteria.id.419	2	135694379	rs1374289	C	T	0.050950572	0.011379037	4.534037247	5.79E-06	16312	24
729	class.Actinobacteria.id.419	2	137015991	rs4452212	A	G	0.052626864	0.011619434	4.493406181	7.01E-06	16313	24
730	class.Actinobacteria.id.419	22	35582079	rs134413	C	T	0.103539156	0.023549332	4.483049184	7.36E-06	14302	20
731	class.Actinobacteria.id.419	5	428754	rs67665078	G	A	0.049210512	0.011118076	4.423615019	9.71E-06	16312	24
732	class.Actinobacteria.id.419	5	434722	rs34453673	G	C	0.052937508	0.01155271	4.478979505	7.50E-06	16312	24
733	class.Actinobacteria.id.419	2	135713703	rs3769023	G	A	0.050827387	0.011362522	4.516266912	6.29E-06	16313	24
734	class.Actinobacteria.id.419	11	71221248	rs4945008	G	A	0.054074066	0.012139345	4.548913054	5.39E-06	16313	24
735	class.Actinobacteria.id.419	5	494064	rs56051594	C	T	0.051688191	0.011454042	4.453572221	8.45E-06	16182	23
737	class.Actinobacteria.id.419	5	428231	rs12188678	T	C	0.052622779	0.011575509	4.459674853	8.21E-06	16313	24
739	class.Actinobacteria.id.419	2	136405878	rs2289963	G	A	0.087530081	0.019279504	4.463579612	8.06E-06	16313	24
743	class.Actinobacteria.id.419	5	443236	rs115554641	C	G	0.053073039	0.011540428	4.478255137	7.53E-06	16312	24
748	class.Actinobacteria.id.419	22	35585990	rs134422	T	C	0.102986027	0.023532108	4.471319653	7.77E-06	14302	20
749	class.Actinobacteria.id.419	5	428236	rs12188164	C	A	0.052563785	0.011575071	4.454048898	8.43E-06	16313	24
753	class.Actinobacteria.id.419	22	35584580	rs5755641	T	C	0.102670319	0.023538246	4.458698947	8.25E-06	14302	20
754	class.Actinobacteria.id.419	5	443676	rs11739543	G	A	0.052721525	0.011540742	4.464623726	8.02E-06	16312	24
756	class.Actinobacteria.id.419	2	136412472	rs7560535	G	A	0.079595004	0.017642072	4.462271873	8.11E-06	16312	24
757	class.Actinobacteria.id.419	5	428785	rs72717410	A	T	0.052432684	0.011567561	4.441273184	8.94E-06	16312	24
766	class.Actinobacteria.id.419	2	137041634	rs72847647	G	A	-0.055907348	0.012636102	-4.509271947	6.51E-06	15401	22
770	class.Actinobacteria.id.419	5	429381	rs72717412	C	T	0.052367852	0.011580799	4.424944302	9.65E-06	16313	24
773	class.Actinobacteria.id.419	6	14617591	rs857444	T	C	0.050955263	0.011539048	4.441766529	8.92E-06	16312	24
774	class.Actinobacteria.id.419	22	35561670	rs134327	G	A	0.103807632	0.02351862	4.439350415	9.02E-06	14302	20
775	class.Actinobacteria.id.419	2	136452402	rs625118	C	A	0.074135767	0.016692236	4.449247809	8.62E-06	16313	24
776	class.Actinobacteria.id.419	5	448291	rs72717436	C	A	0.052554254	0.011544185	4.443838635	8.84E-06	16312	24
777	class.Actinobacteria.id.419	5	423595	rs56346498	C	T	0.052184258	0.011577888	4.422314365	9.76E-06	16313	24
787	class.Actinobacteria.id.419	5	448202	rs72717435	G	A	0.052437635	0.011544258	4.432002218	9.34E-06	16312	24
788	class.Actinobacteria.id.419	5	450710	rs11743639	C	T	0.052326861	0.011543322	4.429522807	9.44E-06	16312	24
790	class.Actinobacteria.id.419	6	14618107	rs861392	T	C	0.05095964	0.01158046	4.420400744	9.85E-06	16312	24
793	class.Actinobacteria.id.419	2	135288740	rs638382	C	T	-0.050840606	0.011680687	-4.472706811	7.72E-06	15529	23
798	class.Actinobacteria.id.419	5	450777	rs11745789	T	C	0.052266148	0.011543313	4.424259911	9.68E-06	16312	24
800	class.Actinobacteria.id.419	5	448663	rs72717438	C	T	0.052287448	0.011543855	4.420696597	9.84E-06	16312	24
813	class.Actinobacteria.id.419	5	521096	rs4957061	C	T	0.049600191	0.011177342	4.424558302	9.66E-06	16182	23
1663	class.Alphaproteobacteria.id.2379	3	13726736	rs9813022	G	A	-0.075127704	0.015386652	-4.881403724	1.05E-06	9593	23
1664	class.Alphaproteobacteria.id.2379	2	169033340	rs76784716	G	A	0.133271299	0.026773761	5.022835714	5.09E-07	9593	23
1665	class.Alphaproteobacteria.id.2379	9	95517807	rs140912403	T	C	-0.160677133	0.031770756	-4.98476783	6.20E-07	8520	19
1666	class.Alphaproteobacteria.id.2379	2	169071190	rs77497586	G	T	0.132413484	0.026766208	5.003580073	5.63E-07	9588	23
1667	class.Alphaproteobacteria.id.2379	2	169035555	rs75071199	C	A	0.13054204	0.02676819	4.937676946	7.91E-07	9593	23
1668	class.Alphaproteobacteria.id.2379	2	169032847	rs55661963	A	C	0.130428894	0.026764262	4.905367858	9.33E-07	9592	23
1669	class.Alphaproteobacteria.id.2379	2	75630344	rs34569731	G	A	0.070514454	0.015756373	4.482448112	7.38E-06	9115	22
1670	class.Alphaproteobacteria.id.2379	1	14238305	rs10803434	T	A	-0.069274224	0.01488663	-4.635873227	3.55E-06	9115	22
1671	class.Alphaproteobacteria.id.2379	1	14235500	rs10803433	G	T	-0.069154454	0.014895158	-4.633086434	3.60E-06	9115	22
1672	class.Alphaproteobacteria.id.2379	1	14237033	.	A	C	-0.068612968	0.014907409	-4.593555664	4.36E-06	9115	22
1673	class.Alphaproteobacteria.id.2379	1	14239278	rs12740709	C	A	-0.067869949	0.014900957	-4.547878649	5.42E-06	9115	22
1674	class.Alphaproteobacteria.id.2379	3	84471266	rs55876211	T	C	-0.080810954	0.01841593	-4.477948191	7.54E-06	9589	23
1675	class.Alphaproteobacteria.id.2379	12	89471235	rs7960664	A	G	0.096948894	0.021514853	4.443687332	8.84E-06	9596	23
1678	class.Alphaproteobacteria.id.2379	3	59982336	rs17061716	C	G	0.092734145	0.020756923	4.432085968	9.33E-06	9465	22
1679	class.Alphaproteobacteria.id.2379	19	28641647	rs12977163	C	G	0.069023356	0.015382895	4.4894166	7.14E-06	9115	22
1733	class.Alphaproteobacteria.id.2379	3	176407911	rs62285697	T	C	0.080525582	0.018091166	4.422438163	9.76E-06	9115	22
1735	class.Alphaproteobacteria.id.2379	16	56676272	rs8048637	G	T	0.077933993	0.017371698	4.438002015	9.08E-06	9596	23
1754	class.Alphaproteobacteria.id.2379	9	95446818	rs150933400	G	A	-0.110162996	0.024438792	-4.437223052	9.11E-06	9425	21
2304	class.Bacilli.id.1673	8	10143164	rs2952251	G	A	-0.059886787	0.012390272	-4.876664128	1.08E-06	17360	24
2305	class.Bacilli.id.1673	5	174173171	rs77558518	G	A	-0.107254772	0.022287875	-4.834066003	1.34E-06	15836	20
2306	class.Bacilli.id.1673	1	200418805	rs57872228	T	C	-0.071477336	0.014664695	-4.907599909	9.22E-07	17375	24
2307	class.Bacilli.id.1673	4	98052765	rs12642660	G	A	-0.074834296	0.015478404	-4.71447011	2.42E-06	17374	24
2308	class.Bacilli.id.1673	16	991253	rs35344081	A	G	0.061952894	0.012706646	4.888712568	1.01E-06	17374	24
2309	class.Bacilli.id.1673	7	36349586	rs78938557	C	T	0.108007225	0.023285767	4.878507992	1.07E-06	15226	19
2310	class.Bacilli.id.1673	4	98049499	rs11730038	A	G	-0.063074683	0.012871737	-4.757479224	1.96E-06	17377	24
2311	class.Bacilli.id.1673	3	94153993	rs76717940	A	T	0.156331484	0.032594546	4.87784685	1.07E-06	8017	10
2312	class.Bacilli.id.1673	8	10143943	rs2009619	G	A	-0.05866148	0.01241751	-4.765429955	1.88E-06	17373	24
2313	class.Bacilli.id.1673	4	98050429	rs4131679	T	C	-0.062864334	0.012868264	-4.739975657	2.14E-06	17377	24
2314	class.Bacilli.id.1673	4	98048787	rs4293791	T	C	-0.062634354	0.012850033	-4.729246214	2.25E-06	17376	24
2315	class.Bacilli.id.1673	8	10199548	rs17708276	G	A	-0.078791463	0.016612349	-4.770139934	1.84E-06	17266	23
2316	class.Bacilli.id.1673	3	4800550	rs1962325	G	C	0.055421868	0.011478925	4.827246429	1.38E-06	17356	24
2317	class.Bacilli.id.1673	6	67570929	rs74352383	A	T	-0.104495633	0.021708314	-4.807601866	1.53E-06	16519	22
2318	class.Bacilli.id.1673	13	24973509	rs9581006	T	C	0.225309054	0.046769705	4.775279645	1.79E-06	4253	6
2319	class.Bacilli.id.1673	4	98028407	rs80205102	T	C	-0.061499328	0.012878382	-4.631559323	3.63E-06	17377	24
2320	class.Bacilli.id.1673	12	100585559	rs11110282	G	A	-0.101189316	0.021737883	-4.570982741	4.85E-06	16026	21
2321	class.Bacilli.id.1673	8	10143661	rs2975635	C	T	-0.056298229	0.01220294	-4.634182523	3.58E-06	17371	24
2322	class.Bacilli.id.1673	4	98022313	rs6813875	G	A	-0.060923327	0.012857741	-4.598357294	4.26E-06	17377	24
2323	class.Bacilli.id.1673	6	67571426	rs9445783	A	T	-0.102731419	0.021702161	-4.725551967	2.29E-06	16519	22
2324	class.Bacilli.id.1673	4	98043157	rs80327990	A	G	-0.060746044	0.012880689	-4.577731236	4.70E-06	17377	24
2325	class.Bacilli.id.1673	12	100589143	rs12368593	A	C	-0.101125307	0.021999575	-4.520214275	6.18E-06	16026	21
2326	class.Bacilli.id.1673	6	67562265	rs11967379	C	T	-0.102861864	0.021570494	-4.716399529	2.40E-06	16519	22
2327	class.Bacilli.id.1673	5	174170255	rs113280052	T	C	-0.103121414	0.022394829	-4.587558601	4.48E-06	15836	20
2328	class.Bacilli.id.1673	4	98037736	rs80123130	A	G	-0.060496007	0.012876517	-4.555458907	5.23E-06	17377	24
2329	class.Bacilli.id.1673	4	98037101	rs4699544	C	A	-0.060417963	0.012878576	-4.550763549	5.35E-06	17377	24
2330	class.Bacilli.id.1673	12	100584966	rs80243853	A	G	-0.100597374	0.022008879	-4.489099566	7.15E-06	16026	21
2331	class.Bacilli.id.1673	17	40835649	rs4028634	C	T	0.052061417	0.010984163	4.733427329	2.21E-06	17377	24
2332	class.Bacilli.id.1673	6	67572618	rs78368499	C	T	-0.101569391	0.021698752	-4.683919176	2.81E-06	16519	22
2333	class.Bacilli.id.1673	16	1009552	rs11248956	T	C	0.058045701	0.012681134	4.65599839	3.22E-06	17377	24
2334	class.Bacilli.id.1673	12	100584014	rs11110281	C	T	-0.1011638	0.022182046	-4.482021436	7.39E-06	15915	20
2335	class.Bacilli.id.1673	4	98042051	rs60533369	C	A	-0.060105658	0.012872697	-4.529411145	5.91E-06	17377	24
2336	class.Bacilli.id.1673	4	98032135	rs11729948	G	A	-0.060055117	0.012880194	-4.521375937	6.14E-06	17377	24
2337	class.Bacilli.id.1673	12	100577526	rs11110276	G	T	-0.098645632	0.021729801	-4.46027509	8.19E-06	16026	21
2338	class.Bacilli.id.1673	8	10143553	rs2952176	A	G	-0.055067593	0.012165008	-4.539041605	5.65E-06	17371	24
2339	class.Bacilli.id.1673	12	100567981	rs7959495	A	C	-0.099460854	0.021901187	-4.446396941	8.73E-06	16026	21
2340	class.Bacilli.id.1673	12	100443122	rs2131006	A	G	-0.090348863	0.019607322	-4.486948302	7.23E-06	16102	22
2341	class.Bacilli.id.1673	12	100582783	rs2559847	C	T	-0.098978225	0.021974244	-4.439355888	9.02E-06	16026	21
2342	class.Bacilli.id.1673	12	100580813	rs11835118	C	T	-0.098161975	0.021751859	-4.432664976	9.31E-06	16026	21
2343	class.Bacilli.id.1673	8	10138824	rs2952228	C	T	-0.055463482	0.012326739	-4.542214242	5.57E-06	17373	24
2344	class.Bacilli.id.1673	12	100591113	rs11110283	C	A	-0.099721296	0.022177896	-4.427555662	9.53E-06	15915	20
2345	class.Bacilli.id.1673	12	100570045	rs78017832	G	T	-0.099866514	0.022151134	-4.426178609	9.59E-06	15915	20
2347	class.Bacilli.id.1673	12	100580705	rs11837200	T	C	-0.097819643	0.021751483	-4.417623535	9.98E-06	16026	21
2349	class.Bacilli.id.1673	6	67571652	rs9445784	C	T	-0.099875219	0.021710965	-4.608742617	4.05E-06	16516	22
2350	class.Bacilli.id.1673	16	1007763	rs12595929	C	T	0.057194943	0.012666807	4.583404464	4.57E-06	17377	24
2351	class.Bacilli.id.1673	4	98016515	rs7689028	T	A	-0.051443391	0.011371699	-4.505735218	6.61E-06	17375	24
2352	class.Bacilli.id.1673	15	58738075	rs694949	G	A	-0.081145978	0.018004225	-4.47626987	7.60E-06	16600	23
2354	class.Bacilli.id.1673	8	10132326	rs11249980	C	T	-0.054888606	0.012342724	-4.46490636	8.01E-06	17377	24
2356	class.Bacilli.id.1673	8	10136381	rs2975647	G	A	-0.054822655	0.01232605	-4.482633672	7.37E-06	17373	24
2358	class.Bacilli.id.1673	11	8332350	rs12797734	C	T	0.057215761	0.012679292	4.487343892	7.21E-06	16902	23
2360	class.Bacilli.id.1673	8	10132395	rs2975655	G	A	-0.05451839	0.012338799	-4.44175841	8.92E-06	17377	24
2362	class.Bacilli.id.1673	8	10126348	rs4260895	A	C	-0.054139453	0.012276116	-4.497540024	6.87E-06	17377	24
2366	class.Bacilli.id.1673	8	10135940	rs2975649	C	T	-0.054525971	0.012329078	-4.456800022	8.32E-06	17366	24
2368	class.Bacilli.id.1673	4	98018211	rs11097541	G	A	-0.051159961	0.011475721	-4.440169624	8.99E-06	17376	24
2370	class.Bacilli.id.1673	4	98021331	rs11932798	C	T	-0.050872644	0.011369029	-4.450106178	8.58E-06	17376	24
2371	class.Bacilli.id.1673	9	101101172	rs28564647	G	T	-0.061303431	0.013757893	-4.470272874	7.81E-06	17368	24
2374	class.Bacilli.id.1673	6	67568615	rs7764486	A	G	-0.098715127	0.02169238	-4.515990149	6.30E-06	16519	22
2377	class.Bacilli.id.1673	8	10126062	rs2952183	C	T	-0.064889034	0.015065393	-4.417480275	9.99E-06	17376	24
2379	class.Bacilli.id.1673	17	40835922	rs2271029	C	A	0.050121119	0.010994315	4.551534681	5.33E-06	17377	24
2381	class.Bacilli.id.1673	4	151687420	rs7666190	A	C	-0.104044367	0.024793431	-4.4529896	8.47E-06	10436	15
2383	class.Bacilli.id.1673	4	151688678	rs11726025	G	A	-0.104217123	0.024815819	-4.451414966	8.53E-06	10436	15
2396	class.Bacilli.id.1673	4	151691575	rs10034695	T	C	-0.104433903	0.024788155	-4.425583944	9.62E-06	10436	15
2399	class.Bacilli.id.1673	6	67559323	rs9345899	G	A	-0.080243842	0.017534638	-4.503826415	6.67E-06	16600	23
2405	class.Bacilli.id.1673	16	1012750	rs7187700	G	A	0.05574433	0.01267619	4.442931748	8.87E-06	17377	24
2407	class.Bacilli.id.1673	3	4802165	rs7627280	T	C	0.051120831	0.011464776	4.44437923	8.81E-06	17375	24
2409	class.Bacilli.id.1673	4	7431487	rs4459992	C	T	0.053585401	0.011636181	4.596408163	4.30E-06	17362	24
2422	class.Bacilli.id.1673	19	51959855	rs34989881	G	A	0.111055893	0.024603898	4.507944703	6.55E-06	12966	16
2425	class.Bacilli.id.1673	4	184681021	rs111552159	G	C	0.128031637	0.028692104	4.436857163	9.13E-06	11350	13
2433	class.Bacilli.id.1673	3	64398863	rs13068444	G	A	0.060103454	0.013640742	4.427560671	9.53E-06	17260	23
2440	class.Bacilli.id.1673	2	231723657	rs1595463	A	C	0.04768644	0.010854727	4.465886264	7.97E-06	17358	24
2456	class.Bacilli.id.1673	3	184371224	rs74663707	T	C	0.097915445	0.022407373	4.453279264	8.46E-06	15769	20
2939	class.Bacteroidia.id.912	13	70523029	rs55773148	A	G	-0.121513597	0.023675903	-5.073977531	3.90E-07	11349	16
2940	class.Bacteroidia.id.912	13	70523117	rs55993203	G	A	-0.121513597	0.023675903	-5.073977531	3.90E-07	11349	16
2941	class.Bacteroidia.id.912	3	89339527	rs7631304	A	G	-0.064577053	0.013295739	-4.926587522	8.37E-07	18334	24
2942	class.Bacteroidia.id.912	13	70522683	rs73512608	A	G	-0.121371693	0.023675946	-5.065231275	4.08E-07	11349	16
2943	class.Bacteroidia.id.912	3	89340254	rs73846128	G	A	-0.064852276	0.013349001	-4.917639798	8.76E-07	18334	24
2944	class.Bacteroidia.id.912	13	70523468	rs56358950	T	C	-0.121435136	0.023675384	-5.047446157	4.48E-07	11349	16
2945	class.Bacteroidia.id.912	13	70525153	rs60610351	T	A	-0.12080715	0.023676318	-5.032123798	4.85E-07	11349	16
2946	class.Bacteroidia.id.912	13	70524658	rs58269684	C	T	-0.121287005	0.023675979	-5.046920422	4.49E-07	11349	16
2947	class.Bacteroidia.id.912	13	70523601	rs74090639	G	A	-0.120555953	0.023675852	-5.004937628	5.59E-07	11349	16
2948	class.Bacteroidia.id.912	3	89322324	rs11929346	T	C	-0.063895732	0.013281979	-4.872473988	1.10E-06	18334	24
2949	class.Bacteroidia.id.912	3	89323493	rs35800684	G	A	-0.063738216	0.013281131	-4.863678017	1.15E-06	18334	24
2950	class.Bacteroidia.id.912	13	70524034	rs60614038	T	A	-0.119786506	0.023676885	-4.981635308	6.30E-07	11349	16
2951	class.Bacteroidia.id.912	13	70524425	rs58298316	T	G	-0.119786506	0.023676885	-4.981635308	6.30E-07	11349	16
2952	class.Bacteroidia.id.912	13	70530878	rs17085771	A	T	-0.119972675	0.023658546	-4.98374282	6.24E-07	11349	16
2953	class.Bacteroidia.id.912	3	89331534	rs7611599	C	T	-0.063078664	0.013293173	-4.813012521	1.49E-06	18334	24
2954	class.Bacteroidia.id.912	13	70518353	rs2210451	C	G	-0.118839105	0.023690031	-4.960878645	7.02E-07	11349	16
2955	class.Bacteroidia.id.912	13	70529980	rs9788409	T	C	-0.119319729	0.023661242	-4.959562166	7.07E-07	11349	16
2956	class.Bacteroidia.id.912	3	89308895	rs74937713	A	T	-0.06345668	0.013221814	-4.847002683	1.25E-06	18326	24
2957	class.Bacteroidia.id.912	13	70517417	rs2150960	G	C	-0.11866866	0.023687676	-4.957104988	7.16E-07	11349	16
2958	class.Bacteroidia.id.912	13	70519186	rs112343530	T	C	-0.118145672	0.023690665	-4.952546305	7.32E-07	11349	16
2959	class.Bacteroidia.id.912	17	6461200	rs73975615	A	G	-0.207017892	0.044263343	-4.852986633	1.22E-06	3350	4
2960	class.Bacteroidia.id.912	13	70521786	rs2210454	C	T	-0.118639426	0.023691551	-4.943140824	7.69E-07	11349	16
2961	class.Bacteroidia.id.912	3	89307462	rs7629132	C	T	-0.063040188	0.013221564	-4.814380656	1.48E-06	18325	24
2962	class.Bacteroidia.id.912	13	70518895	rs74090627	C	T	-0.118323408	0.023690187	-4.936621541	7.95E-07	11349	16
2963	class.Bacteroidia.id.912	13	70517836	rs56949730	A	G	-0.1182291	0.023687904	-4.935873026	7.98E-07	11349	16
2964	class.Bacteroidia.id.912	13	70519152	rs112675712	T	C	-0.117391095	0.023691107	-4.932421238	8.12E-07	11349	16
2965	class.Bacteroidia.id.912	13	70519423	rs80015632	C	G	-0.118132268	0.02369029	-4.929836037	8.23E-07	11349	16
2966	class.Bacteroidia.id.912	13	70522227	rs7337863	C	A	-0.117352699	0.023871793	-4.929326199	8.25E-07	11349	16
2967	class.Bacteroidia.id.912	17	6460281	rs12938514	G	A	-0.199979189	0.041602386	-4.822737119	1.42E-06	3350	4
2968	class.Bacteroidia.id.912	3	89338394	rs12486528	G	A	-0.063643825	0.013426586	-4.805176533	1.55E-06	18334	24
2969	class.Bacteroidia.id.912	3	89306245	rs11920519	A	G	-0.062658713	0.013208448	-4.786515593	1.70E-06	18331	24
2970	class.Bacteroidia.id.912	13	70532097	rs17085818	A	C	-0.118899113	0.023651057	-4.948948788	7.46E-07	11349	16
2971	class.Bacteroidia.id.912	13	70519718	rs2210452	G	A	-0.11749832	0.02368412	-4.909909695	9.11E-07	11349	16
2972	class.Bacteroidia.id.912	3	89331815	rs73846120	A	G	-0.062660509	0.013348747	-4.753897853	2.00E-06	18334	24
2973	class.Bacteroidia.id.912	3	89309177	rs11916046	C	A	-0.062589318	0.013236394	-4.775473985	1.79E-06	18334	24
2974	class.Bacteroidia.id.912	13	70531829	rs17085798	C	A	-0.11827462	0.023656916	-4.934994221	8.02E-07	11349	16
2975	class.Bacteroidia.id.912	14	59317502	rs111845179	C	T	0.102647804	0.021384281	4.907172446	9.24E-07	16393	20
2976	class.Bacteroidia.id.912	3	89311334	rs36076607	T	C	-0.061999915	0.013175249	-4.763803173	1.90E-06	18334	24
2977	class.Bacteroidia.id.912	3	89348956	rs1996069	T	C	-0.062686631	0.013322584	-4.754285389	1.99E-06	18334	24
2978	class.Bacteroidia.id.912	3	89324355	rs71322866	A	C	-0.062723377	0.013335934	-4.760522075	1.93E-06	18334	24
2979	class.Bacteroidia.id.912	3	89305396	rs35532963	C	G	-0.062211881	0.013218145	-4.75213026	2.01E-06	18323	24
2980	class.Bacteroidia.id.912	3	89306168	rs34519192	A	G	-0.062075131	0.013210356	-4.745010352	2.08E-06	18323	24
2981	class.Bacteroidia.id.912	17	6460709	rs11871360	A	G	-0.202863225	0.044183915	-4.76817897	1.86E-06	3350	4
2982	class.Bacteroidia.id.912	3	89304608	rs6794198	C	T	-0.062051045	0.013265848	-4.741542765	2.12E-06	18323	24
2983	class.Bacteroidia.id.912	3	89319382	rs34922683	G	T	-0.06200136	0.013247815	-4.722912335	2.32E-06	18334	24
2984	class.Bacteroidia.id.912	3	89326479	rs907713	A	C	-0.062248814	0.013336736	-4.730620307	2.24E-06	18334	24
2985	class.Bacteroidia.id.912	2	53831026	rs2032750	C	T	-0.050839276	0.010680731	-4.76218434	1.92E-06	17853	23
2986	class.Bacteroidia.id.912	3	89309406	rs11916939	G	A	-0.061840761	0.013244698	-4.71717113	2.39E-06	18334	24
2987	class.Bacteroidia.id.912	3	89316242	rs2346325	A	G	-0.061801647	0.01322604	-4.716682534	2.40E-06	18334	24
2988	class.Bacteroidia.id.912	3	89304244	rs71322864	C	A	-0.061714566	0.013267356	-4.714927254	2.42E-06	18323	24
2989	class.Bacteroidia.id.912	3	89316274	rs1040016	G	T	-0.061767052	0.013226021	-4.714227968	2.43E-06	18334	24
2990	class.Bacteroidia.id.912	3	89316376	rs3946805	A	G	-0.061539825	0.013225865	-4.699765574	2.60E-06	18334	24
2991	class.Bacteroidia.id.912	3	89315917	rs2346324	A	G	-0.06157008	0.013227412	-4.69871174	2.62E-06	18334	24
2992	class.Bacteroidia.id.912	3	89334464	rs35176045	C	T	-0.061384949	0.013291419	-4.692101791	2.70E-06	18334	24
2993	class.Bacteroidia.id.912	3	89304364	rs34046877	T	C	-0.061361573	0.013247271	-4.694667517	2.67E-06	18323	24
2994	class.Bacteroidia.id.912	13	70519922	rs2225529	C	T	-0.115376372	0.023869411	-4.818973178	1.44E-06	11341	16
2995	class.Bacteroidia.id.912	13	70519698	rs4474577	G	A	-0.118225415	0.024402876	-4.81496612	1.47E-06	10868	15
2996	class.Bacteroidia.id.912	13	70524336	rs60660711	G	A	-0.11508196	0.023815582	-4.808896536	1.52E-06	11347	16
2997	class.Bacteroidia.id.912	3	89325131	rs12496485	G	A	-0.061838662	0.013357911	-4.690776339	2.72E-06	18334	24
2998	class.Bacteroidia.id.912	13	70522443	rs7338117	A	G	-0.114955072	0.023857064	-4.800508882	1.58E-06	11349	16
2999	class.Bacteroidia.id.912	3	89315816	rs13100590	T	C	-0.061196939	0.013227504	-4.670629576	3.00E-06	18334	24
3000	class.Bacteroidia.id.912	13	70522595	rs17085738	T	G	-0.114919631	0.023851718	-4.794543007	1.63E-06	11349	16
3001	class.Bacteroidia.id.912	13	70522661	rs17085746	A	G	-0.114919631	0.023851718	-4.794543007	1.63E-06	11349	16
3002	class.Bacteroidia.id.912	13	70520899	rs73510191	A	C	-0.115162757	0.023691973	-4.792472222	1.65E-06	11346	16
3003	class.Bacteroidia.id.912	13	70523638	rs56335733	C	T	-0.115348066	0.023850895	-4.79142298	1.66E-06	11349	16
3004	class.Bacteroidia.id.912	13	70519253	rs73510178	G	A	-0.114743375	0.023866914	-4.789731685	1.67E-06	11349	16
3005	class.Bacteroidia.id.912	3	89315614	rs17026821	T	C	-0.061111869	0.013227522	-4.664656471	3.09E-06	18334	24
3006	class.Bacteroidia.id.912	3	89292011	rs13060907	G	A	-0.061102997	0.013276612	-4.659483957	3.17E-06	18332	24
3007	class.Bacteroidia.id.912	1	176792690	rs7546249	A	T	-0.056711256	0.01183859	-4.804919264	1.55E-06	18333	24
3008	class.Bacteroidia.id.912	13	70525139	rs61070599	C	T	-0.114624019	0.023851912	-4.772903462	1.82E-06	11349	16
3009	class.Bacteroidia.id.912	3	89315046	rs6777119	T	C	-0.060830496	0.013227795	-4.64782824	3.35E-06	18334	24
3010	class.Bacteroidia.id.912	3	89297466	rs6791217	G	T	-0.060906278	0.013287549	-4.642873633	3.44E-06	18332	24
3011	class.Bacteroidia.id.912	13	70520090	rs60722059	A	G	-0.114057889	0.023866603	-4.766446031	1.88E-06	11349	16
3012	class.Bacteroidia.id.912	3	89286083	rs17026797	G	T	-0.061204973	0.013245171	-4.666270865	3.07E-06	18332	24
3013	class.Bacteroidia.id.912	13	70525553	rs60869989	G	A	-0.114237592	0.023852194	-4.759374698	1.94E-06	11349	16
3014	class.Bacteroidia.id.912	13	70526850	rs73512626	C	A	-0.114029892	0.023833442	-4.751641718	2.02E-06	11349	16
3015	class.Bacteroidia.id.912	13	70520200	rs74090631	A	G	-0.1136445	0.023866741	-4.743527947	2.10E-06	11349	16
3016	class.Bacteroidia.id.912	13	70520305	rs73510184	C	T	-0.1136445	0.023866741	-4.743527947	2.10E-06	11349	16
3017	class.Bacteroidia.id.912	13	70524468	rs61289215	C	T	-0.113878728	0.023852322	-4.73489028	2.19E-06	11349	16
3018	class.Bacteroidia.id.912	3	89313541	rs13097740	G	A	-0.059976428	0.013248685	-4.608829149	4.05E-06	18332	24
3019	class.Bacteroidia.id.912	3	89290305	rs1996068	A	G	-0.06049203	0.013228641	-4.614513818	3.94E-06	18332	24
3020	class.Bacteroidia.id.912	3	89334824	rs35665203	T	C	-0.060718251	0.013354439	-4.609405948	4.04E-06	18334	24
3021	class.Bacteroidia.id.912	13	70518842	rs74090626	A	G	-0.11322199	0.023865131	-4.724955276	2.30E-06	11349	16
3022	class.Bacteroidia.id.912	13	70517877	rs60814075	C	T	-0.11313899	0.023862758	-4.724240968	2.31E-06	11349	16
3023	class.Bacteroidia.id.912	13	70521955	rs7337151	A	C	-0.113189401	0.023867064	-4.72097715	2.35E-06	11349	16
3024	class.Bacteroidia.id.912	13	70513262	rs1888900	T	C	-0.114167554	0.023683051	-4.749926857	2.03E-06	11349	16
3025	class.Bacteroidia.id.912	3	89305425	rs60475411	T	C	-0.060029157	0.013195903	-4.595182233	4.32E-06	18323	24
3026	class.Bacteroidia.id.912	13	70530659	rs60954548	A	G	-0.113387752	0.023833454	-4.71832103	2.38E-06	11349	16
3027	class.Bacteroidia.id.912	13	70513774	rs7320487	T	C	-0.112412835	0.023856235	-4.709836944	2.48E-06	11349	16
3028	class.Bacteroidia.id.912	13	70513882	rs7319197	A	G	-0.112394585	0.023850562	-4.709836944	2.48E-06	11349	16
3029	class.Bacteroidia.id.912	3	89334362	rs34986288	G	A	-0.060608518	0.013529096	-4.578225672	4.69E-06	18329	24
3030	class.Bacteroidia.id.912	1	176802974	rs1014718	G	A	-0.056232942	0.011905739	-4.733052056	2.21E-06	18334	24
3031	class.Bacteroidia.id.912	13	70521407	rs7491419	T	G	-0.112923148	0.023867588	-4.705875249	2.53E-06	11349	16
3032	class.Bacteroidia.id.912	1	176772360	rs1325597	G	T	-0.055687951	0.011887181	-4.702197796	2.57E-06	18334	24
3033	class.Bacteroidia.id.912	1	176772958	rs1555070	C	T	-0.05578017	0.011882772	-4.705320038	2.53E-06	18329	24
3034	class.Bacteroidia.id.912	13	70530535	rs17085756	G	A	-0.112800347	0.02383402	-4.695133391	2.66E-06	11349	16
3035	class.Bacteroidia.id.912	13	70530900	rs17085776	A	G	-0.112917347	0.023831459	-4.696415641	2.65E-06	11349	16
3036	class.Bacteroidia.id.912	3	89313904	rs71322865	C	T	-0.059083416	0.013175805	-4.56907583	4.90E-06	18334	24
3037	class.Bacteroidia.id.912	13	70523892	rs74090642	A	G	-0.112818205	0.023852698	-4.690707439	2.72E-06	11349	16
3038	class.Bacteroidia.id.912	13	70519401	rs75808613	G	A	-0.112296918	0.023865661	-4.684177474	2.81E-06	11349	16
3039	class.Bacteroidia.id.912	13	70519308	rs78745799	G	T	-0.112296918	0.023865661	-4.684177474	2.81E-06	11349	16
3040	class.Bacteroidia.id.912	1	176788394	rs1022523	A	G	-0.055960463	0.01185117	-4.735107722	2.19E-06	18333	24
3041	class.Bacteroidia.id.912	3	89334803	rs73846124	G	A	-0.059635747	0.013298594	-4.560084016	5.11E-06	18334	24
3042	class.Bacteroidia.id.912	13	70530725	rs17085765	G	C	-0.112633656	0.023834178	-4.683895727	2.81E-06	11349	16
3043	class.Bacteroidia.id.912	13	70531223	rs17085785	C	T	-0.112299188	0.023832027	-4.677254413	2.91E-06	11349	16
3044	class.Bacteroidia.id.912	16	74290641	rs929878	T	C	-0.054853206	0.012152954	-4.576253529	4.73E-06	18334	24
3045	class.Bacteroidia.id.912	13	70517106	rs2183908	T	C	-0.111449418	0.023863969	-4.669018384	3.03E-06	11349	16
3046	class.Bacteroidia.id.912	13	70532016	rs17085809	A	G	-0.112609777	0.023823633	-4.70036177	2.60E-06	11349	16
3047	class.Bacteroidia.id.912	13	70531600	rs17085791	G	C	-0.111465249	0.023824107	-4.652347885	3.28E-06	11349	16
3048	class.Bacteroidia.id.912	13	70513244	rs2875575	G	C	-0.111649779	0.023703391	-4.642811875	3.44E-06	11349	16
3049	class.Bacteroidia.id.912	9	116888284	rs13291169	G	C	0.068967579	0.014876501	4.625010725	3.75E-06	17513	23
3050	class.Bacteroidia.id.912	13	70532600	rs59082732	T	G	-0.112443996	0.02382863	-4.66197997	3.13E-06	11349	16
3051	class.Bacteroidia.id.912	13	70513238	rs1888899	C	T	-0.112051526	0.023697212	-4.648240746	3.35E-06	11349	16
3053	class.Bacteroidia.id.912	9	116888634	rs13291434	C	T	0.069465573	0.014978949	4.597353133	4.28E-06	17400	22
3054	class.Bacteroidia.id.912	22	27433885	rs17343978	C	A	-0.055205684	0.012027767	-4.455769606	8.36E-06	18334	24
3055	class.Bacteroidia.id.912	13	70520953	rs73510192	T	C	-0.111215702	0.024184518	-4.602124565	4.18E-06	10868	15
3056	class.Bacteroidia.id.912	17	6462820	rs73975618	A	G	-0.188993566	0.042803049	-4.49673057	6.90E-06	3350	4
3057	class.Bacteroidia.id.912	13	70520688	rs73510188	G	A	-0.110327575	0.024185002	-4.575481163	4.75E-06	10868	15
3058	class.Bacteroidia.id.912	13	70520722	rs73510190	G	C	-0.110327575	0.024185002	-4.575481163	4.75E-06	10868	15
3059	class.Bacteroidia.id.912	1	157495438	rs72706335	C	T	-0.222409754	0.049345816	-4.474607184	7.66E-06	3819	4
3060	class.Bacteroidia.id.912	14	59338832	rs7157380	G	C	0.095927991	0.021284826	4.580770229	4.63E-06	17297	21
3061	class.Bacteroidia.id.912	3	89325083	rs12486971	T	C	-0.059568881	0.013617023	-4.450743483	8.56E-06	18327	24
3062	class.Bacteroidia.id.912	9	116887845	rs7857688	G	A	0.063523087	0.014061487	4.533861748	5.79E-06	17523	23
3063	class.Bacteroidia.id.912	10	39062269	rs11146701	G	A	0.047359582	0.010540996	4.491200742	7.08E-06	18220	23
3066	class.Bacteroidia.id.912	8	70916181	rs62531359	G	T	0.065572807	0.014989058	4.437839192	9.09E-06	18320	24
3069	class.Bacteroidia.id.912	1	200112563	NA	T	C	-0.222740921	0.050805496	-4.418589657	9.93E-06	3061	4
3074	class.Bacteroidia.id.912	9	116890596	rs2418267	G	A	0.060732382	0.013561935	4.489010527	7.16E-06	17523	23
3075	class.Bacteroidia.id.912	2	213189994	rs4146051	G	A	-0.107377003	0.024566124	-4.445610503	8.76E-06	11372	16
3077	class.Bacteroidia.id.912	2	213191389	rs1505366	G	T	-0.107336846	0.024124381	-4.442487668	8.89E-06	11853	17
3082	class.Bacteroidia.id.912	8	13110185	rs79585701	C	A	0.064682288	0.01496282	4.417478809	9.99E-06	18334	24
3093	class.Bacteroidia.id.912	3	195936789	rs4916508	A	G	-0.046672941	0.010531247	-4.452916809	8.47E-06	18324	24
3094	class.Bacteroidia.id.912	14	59307933	rs1365795	T	C	0.089696782	0.020312513	4.463140714	8.08E-06	17298	21
3110	class.Bacteroidia.id.912	9	136493820	rs62575403	T	C	0.140054866	0.031112824	4.491832787	7.06E-06	9668	12
3705	class.Betaproteobacteria.id.2867	4	45642485	rs4033856	T	C	0.083242265	0.016723677	5.019832426	5.17E-07	15945	22
3706	class.Betaproteobacteria.id.2867	3	193456274	rs2367850	C	G	0.064005972	0.013037436	4.909785173	9.12E-07	16717	23
3707	class.Betaproteobacteria.id.2867	2	239888758	rs12467854	C	G	0.06413625	0.013176625	4.87309522	1.10E-06	17038	23
3708	class.Betaproteobacteria.id.2867	20	30596130	rs6087811	G	T	-0.097817738	0.019852201	-4.949431749	7.44E-07	16184	21
3709	class.Betaproteobacteria.id.2867	2	239900775	rs62191117	G	A	0.064104357	0.013227087	4.861406074	1.17E-06	17029	23
3710	class.Betaproteobacteria.id.2867	2	239865055	rs4511740	A	G	0.06139735	0.012808399	4.791099509	1.66E-06	17150	24
3711	class.Betaproteobacteria.id.2867	20	30591039	rs78428620	C	T	-0.098204765	0.020311993	-4.844425404	1.27E-06	16185	21
3712	class.Betaproteobacteria.id.2867	2	239893009	rs11679161	C	T	0.061917298	0.013153576	4.729777236	2.25E-06	17043	23
3713	class.Betaproteobacteria.id.2867	2	239892208	rs11683769	A	T	0.061895148	0.013161655	4.725893211	2.29E-06	17043	23
3714	class.Betaproteobacteria.id.2867	5	173497796	rs62395635	C	T	0.109740893	0.02360002	4.6749038	2.94E-06	15108	20
3715	class.Betaproteobacteria.id.2867	7	111285025	rs2613606	T	C	-0.051310589	0.010909103	-4.734296144	2.20E-06	17146	24
3716	class.Betaproteobacteria.id.2867	7	111285576	rs1859743	C	T	-0.051442726	0.010968277	-4.734364132	2.20E-06	17043	23
3717	class.Betaproteobacteria.id.2867	1	153240013	rs1928341	G	A	0.052558097	0.011040784	4.751884819	2.02E-06	17150	24
3718	class.Betaproteobacteria.id.2867	2	239868159	rs36119524	C	T	0.061024745	0.013341153	4.59158751	4.40E-06	17042	23
3719	class.Betaproteobacteria.id.2867	9	84206018	rs72747231	G	C	-0.137280671	0.029033768	-4.747928522	2.06E-06	11344	13
3720	class.Betaproteobacteria.id.2867	2	239877738	rs4591362	G	A	0.061301979	0.013471417	4.589782688	4.44E-06	17043	23
3721	class.Betaproteobacteria.id.2867	1	153242805	rs10788864	A	T	0.052150324	0.011046919	4.72221133	2.33E-06	17142	24
3722	class.Betaproteobacteria.id.2867	2	239864732	rs4507125	A	C	0.059943336	0.013206111	4.536054909	5.73E-06	17149	24
3723	class.Betaproteobacteria.id.2867	3	70592215	rs11128180	G	A	0.059294412	0.012876923	4.629164652	3.67E-06	17151	24
3724	class.Betaproteobacteria.id.2867	1	153239426	rs10047202	C	T	0.051839207	0.011040378	4.687690773	2.76E-06	17150	24
3725	class.Betaproteobacteria.id.2867	13	58689340	rs2321387	A	G	-0.049459619	0.010942399	-4.533538919	5.80E-06	17149	24
3726	class.Betaproteobacteria.id.2867	7	111287998	rs2528680	C	T	-0.050134816	0.010910788	-4.625401311	3.74E-06	17151	24
3727	class.Betaproteobacteria.id.2867	7	111289472	rs1122678	T	C	-0.050147867	0.010910606	-4.624242242	3.76E-06	17151	24
3728	class.Betaproteobacteria.id.2867	2	239877148	rs12477314	C	T	0.060496225	0.0134724	4.527868809	5.96E-06	17043	23
3729	class.Betaproteobacteria.id.2867	3	70588939	rs7638039	C	T	0.057694501	0.012653895	4.549124533	5.39E-06	17132	24
3730	class.Betaproteobacteria.id.2867	1	153239586	rs2094636	C	G	0.05141637	0.011043949	4.656495434	3.22E-06	17150	24
3731	class.Betaproteobacteria.id.2867	1	153238503	rs1410861	A	G	0.051449743	0.011039699	4.651779986	3.29E-06	17150	24
3732	class.Betaproteobacteria.id.2867	2	239875986	rs62191106	C	T	0.060360057	0.013451186	4.505168395	6.63E-06	17042	23
3733	class.Betaproteobacteria.id.2867	2	239876527	rs62191107	T	C	0.06036834	0.013451685	4.50409675	6.67E-06	17042	23
3734	class.Betaproteobacteria.id.2867	7	111288089	rs2528681	G	C	-0.049708513	0.010910109	-4.585504245	4.53E-06	17151	24
3735	class.Betaproteobacteria.id.2867	7	111285820	rs1544475	C	T	-0.050004839	0.010937892	-4.60014599	4.22E-06	17151	24
3736	class.Betaproteobacteria.id.2867	1	153237922	rs6686895	A	G	0.05120754	0.011039931	4.630035138	3.66E-06	17149	24
3737	class.Betaproteobacteria.id.2867	7	111294074	rs2040996	C	T	-0.049793121	0.01091107	-4.579356798	4.66E-06	17142	24
3738	class.Betaproteobacteria.id.2867	7	111292983	rs976935	C	A	-0.049540677	0.010911915	-4.569567428	4.89E-06	17144	24
3739	class.Betaproteobacteria.id.2867	2	239868927	rs34177861	G	A	0.059524486	0.013448841	4.474878379	7.65E-06	17042	23
3740	class.Betaproteobacteria.id.2867	7	111286879	rs2528678	C	T	-0.049780106	0.010938043	-4.581409563	4.62E-06	17151	24
3741	class.Betaproteobacteria.id.2867	13	58708500	rs12867878	G	A	-0.050233534	0.011224457	-4.507744904	6.55E-06	17151	24
3742	class.Betaproteobacteria.id.2867	4	23588462	rs1511453	G	A	0.092349246	0.019915827	4.575199961	4.76E-06	17085	23
3744	class.Betaproteobacteria.id.2867	20	30594699	rs8119189	C	A	-0.092962053	0.02026735	-4.595772266	4.31E-06	16185	21
3745	class.Betaproteobacteria.id.2867	2	239864826	rs4521068	G	A	0.058901469	0.013309572	4.437305917	9.11E-06	17043	23
3746	class.Betaproteobacteria.id.2867	3	193463459	rs56104821	C	A	0.057088256	0.012810361	4.445666127	8.76E-06	17147	24
3747	class.Betaproteobacteria.id.2867	13	58535792	rs9537878	G	A	-0.048787539	0.010955935	-4.466936874	7.93E-06	17151	24
3748	class.Betaproteobacteria.id.2867	18	26569901	rs9964679	G	A	0.052911029	0.011486591	4.571355264	4.85E-06	17151	24
3749	class.Betaproteobacteria.id.2867	8	112732674	rs56386628	T	C	-0.062225169	0.013568762	-4.531034614	5.87E-06	17147	24
3750	class.Betaproteobacteria.id.2867	2	239875322	rs11124193	A	G	0.059280653	0.01345012	4.418186565	9.95E-06	17042	23
3751	class.Betaproteobacteria.id.2867	20	30589733	rs6087810	C	T	-0.092890745	0.020324112	-4.572269636	4.82E-06	16184	21
3752	class.Betaproteobacteria.id.2867	13	58533627	rs7326330	T	C	-0.048580474	0.010955948	-4.449616424	8.60E-06	17151	24
3753	class.Betaproteobacteria.id.2867	7	111289967	rs1419746	G	A	-0.048829688	0.010912182	-4.503176153	6.69E-06	17146	24
3754	class.Betaproteobacteria.id.2867	13	58696106	rs7324740	A	G	-0.049731029	0.011275039	-4.433142956	9.29E-06	17150	24
3755	class.Betaproteobacteria.id.2867	7	111297819	rs2528688	G	A	-0.048815155	0.010921999	-4.495320417	6.95E-06	17150	24
3756	class.Betaproteobacteria.id.2867	7	111287980	rs2528679	T	C	-0.04884787	0.010934307	-4.493632561	7.00E-06	17151	24
3757	class.Betaproteobacteria.id.2867	20	30598898	rs76625259	T	G	-0.090859827	0.020033434	-4.549191064	5.39E-06	16185	21
3758	class.Betaproteobacteria.id.2867	13	58599245	rs7988877	T	A	-0.049547552	0.011177066	-4.452269497	8.50E-06	16717	23
3760	class.Betaproteobacteria.id.2867	7	111293616	rs2906622	T	C	-0.048718118	0.010909572	-4.485243563	7.28E-06	17144	24
3761	class.Betaproteobacteria.id.2867	13	58530277	rs1926544	A	C	-0.048280536	0.010956396	-4.420676479	9.84E-06	17151	24
3764	class.Betaproteobacteria.id.2867	13	58595043	rs1581853	G	A	-0.04933928	0.01117766	-4.435790734	9.17E-06	16717	23
3766	class.Betaproteobacteria.id.2867	13	107906880	rs9520346	G	C	0.142413892	0.033258683	4.476508668	7.59E-06	4797	6
3767	class.Betaproteobacteria.id.2867	7	111291580	rs2528684	T	C	-0.048327569	0.010912429	-4.45860769	8.25E-06	17144	24
3768	class.Betaproteobacteria.id.2867	7	111289034	rs2613608	G	A	-0.048330724	0.010919368	-4.454753424	8.40E-06	17150	24
3771	class.Betaproteobacteria.id.2867	4	23590530	rs34203874	C	T	0.089847773	0.019916927	4.442182445	8.91E-06	17085	23
3772	class.Betaproteobacteria.id.2867	9	104899117	rs320161	G	A	0.057228557	0.012619964	4.483803401	7.33E-06	17035	23
3787	class.Betaproteobacteria.id.2867	1	153237467	rs4585927	T	C	0.049260613	0.011029248	4.45730036	8.30E-06	17150	24
3794	class.Betaproteobacteria.id.2867	9	104888414	rs320179	A	C	0.056733056	0.012569773	4.435816969	9.17E-06	17146	24
3818	class.Betaproteobacteria.id.2867	2	239906429	rs13385989	A	C	0.060002805	0.01354874	4.424046695	9.69E-06	16717	23
3824	class.Betaproteobacteria.id.2867	13	25111456	rs9553336	T	G	0.08927712	0.020416749	4.436649735	9.14E-06	15641	20
3828	class.Betaproteobacteria.id.2867	15	56786407	rs75242906	T	C	-0.121083253	0.028074987	-4.433471361	9.27E-06	10803	14
4327	class.Clostridia.id.1859	4	152131744	rs6815608	C	T	0.103803179	0.021088299	5.068075757	4.02E-07	16731	22
4328	class.Clostridia.id.1859	21	18567802	NA	T	C	0.255638798	0.050878716	4.917289229	8.78E-07	3501	8
4329	class.Clostridia.id.1859	21	40703251	rs112334273	A	G	0.064100812	0.012740366	5.078010723	3.81E-07	18217	23
4330	class.Clostridia.id.1859	21	18572202	NA	C	T	0.251774086	0.050703322	4.851030166	1.23E-06	3501	8
4331	class.Clostridia.id.1859	4	161507301	rs6814436	C	T	0.073999481	0.015081514	4.898624679	9.65E-07	18336	24
4332	class.Clostridia.id.1859	18	48792829	rs72915163	C	T	-0.058102511	0.012055746	-4.833290492	1.34E-06	18317	24
4333	class.Clostridia.id.1859	14	52494072	rs2273429	G	A	-0.072403727	0.015310495	-4.585853492	4.52E-06	18337	24
4334	class.Clostridia.id.1859	12	5942519	rs10774377	G	A	0.052659008	0.011385834	4.654732866	3.24E-06	18330	24
4335	class.Clostridia.id.1859	12	5943290	rs4764517	T	C	0.052185822	0.011398396	4.613086524	3.97E-06	18331	24
4336	class.Clostridia.id.1859	14	52495231	rs11844758	C	A	-0.071334954	0.015307253	-4.525278082	6.03E-06	18340	24
4337	class.Clostridia.id.1859	14	52493228	rs11846847	T	A	-0.071604928	0.015319184	-4.52108552	6.15E-06	18337	24
4338	class.Clostridia.id.1859	4	161507152	rs4690986	C	G	0.071346627	0.015015853	4.737997884	2.16E-06	18336	24
4339	class.Clostridia.id.1859	12	5949771	rs10774378	C	T	0.05183024	0.011387924	4.578724793	4.68E-06	18339	24
4340	class.Clostridia.id.1859	5	149077788	rs13179700	C	T	0.051193667	0.010956865	4.646824914	3.37E-06	18338	24
4341	class.Clostridia.id.1859	18	48788446	rs6508055	G	A	-0.059020831	0.012528812	-4.687591163	2.76E-06	18340	24
4342	class.Clostridia.id.1859	12	5949262	rs7964593	T	C	0.051239325	0.01139734	4.529487473	5.91E-06	18340	24
4345	class.Clostridia.id.1859	6	163743050	rs6934062	C	G	0.052440576	0.01161154	4.508432731	6.53E-06	17859	23
4346	class.Clostridia.id.1859	5	149077133	rs9986136	G	A	0.050318441	0.011034619	4.550845658	5.34E-06	18340	24
4347	class.Clostridia.id.1859	5	105060362	rs1842454	A	G	-0.054720208	0.012733828	-4.446692994	8.72E-06	18340	24
4348	class.Clostridia.id.1859	5	149076956	rs7731599	T	C	0.049950879	0.011034347	4.517598025	6.25E-06	18340	24
4349	class.Clostridia.id.1859	5	149077655	rs11167476	C	T	0.049935112	0.01102363	4.518037772	6.24E-06	18339	24
4350	class.Clostridia.id.1859	2	231676041	rs10209007	C	G	0.079417263	0.018242714	4.419489467	9.89E-06	17812	23
4351	class.Clostridia.id.1859	2	231678413	rs3792064	A	G	0.07956506	0.018252101	4.417516192	9.98E-06	17812	23
4352	class.Clostridia.id.1859	3	131371980	rs76767978	A	G	0.069888247	0.015631881	4.454777994	8.40E-06	18329	24
4353	class.Clostridia.id.1859	4	7420184	rs13105690	C	T	-0.052909681	0.011817976	-4.445276151	8.78E-06	18340	24
4355	class.Clostridia.id.1859	6	12397187	rs76860606	G	C	0.094703578	0.022511672	4.478082006	7.53E-06	17579	21
4356	class.Clostridia.id.1859	5	35770550	rs72738886	C	T	0.086616952	0.019039264	4.458788875	8.24E-06	16934	21
4357	class.Clostridia.id.1859	20	50803760	rs7269302	T	A	-0.096398079	0.021200675	-4.43893655	9.04E-06	17405	21
4359	class.Clostridia.id.1859	20	50800275	rs6126494	T	G	-0.09693534	0.021169903	-4.436990606	9.12E-06	17405	21
4362	class.Clostridia.id.1859	3	89268714	rs6797343	T	G	0.059227896	0.013455633	4.431534836	9.36E-06	18340	24
4365	class.Clostridia.id.1859	4	161527350	rs6536525	G	C	0.066182895	0.01485376	4.469634495	7.84E-06	18339	24
4368	class.Clostridia.id.1859	18	48789736	rs11082866	A	T	-0.051417776	0.011557714	-4.463661713	8.06E-06	18321	24
4374	class.Clostridia.id.1859	4	161522527	rs7667168	T	C	0.0655264	0.014900702	4.43578804	9.17E-06	18340	24
4375	class.Clostridia.id.1859	4	161527868	rs6536526	T	A	0.065676468	0.01485582	4.435409209	9.19E-06	18339	24
4377	class.Clostridia.id.1859	4	161526396	rs10517722	G	C	0.065408252	0.014837978	4.426421875	9.58E-06	18339	24
4378	class.Clostridia.id.1859	4	161525756	rs7687278	T	A	0.065375888	0.01483579	4.424811784	9.65E-06	18340	24
4387	class.Clostridia.id.1859	2	116724915	rs13421739	G	C	0.088847155	0.017965467	4.427300077	9.54E-06	18340	24
4982	class.Coriobacteriia.id.809	10	65799217	rs719099	G	A	0.077840173	0.01558151	5.010348118	5.43E-07	17687	24
4983	class.Coriobacteriia.id.809	10	65800878	rs2458655	C	A	0.077939915	0.01575872	4.941113672	7.77E-07	17689	24
4984	class.Coriobacteriia.id.809	10	65801279	rs7078773	C	T	0.076005995	0.015586105	4.869463505	1.12E-06	17689	24
4985	class.Coriobacteriia.id.809	1	176571431	rs240104	C	T	-0.060342897	0.012684911	-4.809111417	1.52E-06	17577	23
4986	class.Coriobacteriia.id.809	10	65799626	rs56374305	C	G	0.100060741	0.020627921	4.860959583	1.17E-06	17688	24
4987	class.Coriobacteriia.id.809	10	1922731	rs11250875	C	T	0.060749978	0.013093887	4.572106901	4.83E-06	17690	24
4988	class.Coriobacteriia.id.809	10	65803263	rs10995776	C	T	0.081713259	0.01745992	4.712954063	2.44E-06	17691	24
4989	class.Coriobacteriia.id.809	17	37376685	rs34739816	T	G	0.096501674	0.020766582	4.617517509	3.88E-06	16593	20
4990	class.Coriobacteriia.id.809	5	125460084	rs76779974	G	C	0.0774888	0.017187698	4.539794605	5.63E-06	16419	21
4991	class.Coriobacteriia.id.809	5	459415	rs80046645	G	C	0.255839805	0.056199532	4.579679319	4.66E-06	3204	5
4992	class.Coriobacteriia.id.809	19	55857777	rs45480394	G	T	-0.050426168	0.011330684	-4.423433012	9.71E-06	17413	22
4993	class.Coriobacteriia.id.809	12	11494021	rs1816223	G	A	-0.058626474	0.012900576	-4.571556654	4.84E-06	17688	24
4994	class.Coriobacteriia.id.809	10	5644995	rs7898585	C	T	0.073150094	0.01641856	4.554673113	5.25E-06	17691	24
4995	class.Coriobacteriia.id.809	20	62072077	rs67561917	G	A	-0.071436723	0.015411343	-4.548955316	5.39E-06	17333	21
4996	class.Coriobacteriia.id.809	12	11497854	rs7977399	C	T	-0.057830247	0.012912575	-4.523978232	6.07E-06	17689	24
4997	class.Coriobacteriia.id.809	10	5644918	rs7912120	G	A	0.072371252	0.016409354	4.517965349	6.24E-06	17691	24
4998	class.Coriobacteriia.id.809	9	136512906	rs3025411	G	A	0.092654285	0.020946781	4.458095088	8.27E-06	15671	20
4999	class.Coriobacteriia.id.809	17	8121332	rs11656361	C	A	0.077300587	0.01755297	4.464644853	8.02E-06	16665	21
5000	class.Coriobacteriia.id.809	12	11495092	rs7303392	C	T	-0.057215238	0.012867946	-4.484254956	7.32E-06	17688	24
5001	class.Coriobacteriia.id.809	5	90471451	rs1397793	A	G	-0.049885455	0.011244635	-4.422117946	9.77E-06	17527	23
5002	class.Coriobacteriia.id.809	12	11480228	rs1834859	T	G	-0.057254594	0.013032187	-4.466059748	7.97E-06	17686	24
5003	class.Coriobacteriia.id.809	10	5644983	rs7896306	T	G	0.071687947	0.016420823	4.469934843	7.82E-06	17691	24
5004	class.Coriobacteriia.id.809	15	86433579	rs11073596	G	T	0.051021228	0.011433922	4.46135018	8.14E-06	17527	23
5006	class.Coriobacteriia.id.809	3	11654412	rs2442778	A	G	-0.116408329	0.025854513	-4.439256238	9.03E-06	13472	16
5008	class.Coriobacteriia.id.809	1	179629191	rs7540303	T	C	0.048322746	0.010906179	4.425509713	9.62E-06	17691	24
5009	class.Coriobacteriia.id.809	7	24464799	rs62448869	A	T	-0.048605943	0.010898242	-4.468615174	7.87E-06	17527	23
5011	class.Coriobacteriia.id.809	7	105084680	rs13307134	T	C	0.056568602	0.012626474	4.470620179	7.80E-06	17527	23
5013	class.Coriobacteriia.id.809	10	1223742	rs4880783	T	G	0.056502976	0.012505544	4.530118208	5.90E-06	17691	24
5019	class.Coriobacteriia.id.809	19	52895166	rs12974142	A	G	0.078979608	0.017720479	4.451876291	8.51E-06	17413	22
5020	class.Coriobacteriia.id.809	14	39660509	rs8010111	A	G	-0.10337688	0.022928631	-4.496866139	6.90E-06	15996	21
5023	class.Coriobacteriia.id.809	7	24471610	rs60426889	G	T	-0.050421833	0.011379936	-4.447557475	8.69E-06	17689	24
5029	class.Coriobacteriia.id.809	7	24464911	rs62448870	A	G	-0.048103772	0.010894866	-4.428214695	9.50E-06	17527	23
5574	class.Deltaproteobacteria.id.3087	20	33694801	rs6058181	T	C	0.082571565	0.016595819	5.100055448	3.40E-07	15100	23
5575	class.Deltaproteobacteria.id.3087	20	33694580	rs6060239	T	C	0.08206169	0.016635837	5.039060086	4.68E-07	15100	23
5576	class.Deltaproteobacteria.id.3087	20	33694540	rs6060238	G	A	0.081563287	0.016587469	5.031154369	4.88E-07	15101	23
5577	class.Deltaproteobacteria.id.3087	20	33694210	rs6060237	A	G	0.081542622	0.016587496	5.028455744	4.94E-07	15101	23
5578	class.Deltaproteobacteria.id.3087	20	33694699	rs6060240	C	A	0.080788164	0.016763729	4.898734635	9.65E-07	14439	22
5579	class.Deltaproteobacteria.id.3087	17	2856662	rs4506934	T	C	-0.093651362	0.020120034	-4.633873303	3.59E-06	15061	23
5580	class.Deltaproteobacteria.id.3087	9	81834426	rs17791387	G	A	-0.073588121	0.015424623	-4.798044097	1.60E-06	15071	23
5581	class.Deltaproteobacteria.id.3087	17	2859595	rs55640204	A	G	-0.092260301	0.020078668	-4.573076311	4.81E-06	15063	23
5582	class.Deltaproteobacteria.id.3087	21	45064961	rs2838334	A	G	0.056172159	0.012412391	4.546848915	5.45E-06	15168	24
5583	class.Deltaproteobacteria.id.3087	16	71541641	rs9928243	A	C	-0.053845737	0.011771796	-4.563916294	5.02E-06	15167	24
5584	class.Deltaproteobacteria.id.3087	10	11855599	rs11599763	C	T	-0.054421883	0.011739659	-4.614457659	3.94E-06	15168	24
5585	class.Deltaproteobacteria.id.3087	9	15269705	rs112381107	T	C	0.206594184	0.045690815	4.580866121	4.63E-06	4457	7
5586	class.Deltaproteobacteria.id.3087	18	69312914	rs17084793	A	G	-0.071076166	0.015953009	-4.53772861	5.69E-06	15164	24
5587	class.Deltaproteobacteria.id.3087	17	2856655	rs72821212	G	C	-0.090734906	0.020220997	-4.472461066	7.73E-06	15063	23
5588	class.Deltaproteobacteria.id.3087	1	203991605	rs2692012	G	A	0.1103349	0.025333574	4.661321165	3.14E-06	13104	16
5590	class.Deltaproteobacteria.id.3087	11	10658735	rs1035691	G	A	-0.055175977	0.012160175	-4.424832414	9.65E-06	15168	24
5591	class.Deltaproteobacteria.id.3087	15	96161065	rs62020470	G	A	-0.058541133	0.012935848	-4.571137443	4.85E-06	15168	24
5592	class.Deltaproteobacteria.id.3087	15	96159374	rs7164160	T	A	-0.058325007	0.012935769	-4.553400452	5.28E-06	15168	24
5593	class.Deltaproteobacteria.id.3087	16	71541226	rs7199026	A	C	-0.052419071	0.011747774	-4.450243476	8.58E-06	15166	24
5594	class.Deltaproteobacteria.id.3087	1	203308383	rs16851319	C	G	-0.07055156	0.015084942	-4.538005572	5.68E-06	15154	24
5595	class.Deltaproteobacteria.id.3087	11	10660816	rs7936267	G	A	-0.056097513	0.012320639	-4.423298625	9.72E-06	15162	24
5596	class.Deltaproteobacteria.id.3087	15	96158885	rs7163129	T	C	-0.057490288	0.01293597	-4.489027208	7.15E-06	15168	24
5597	class.Deltaproteobacteria.id.3087	15	96158598	rs7162535	T	C	-0.057316396	0.012935872	-4.475357782	7.63E-06	15168	24
5598	class.Deltaproteobacteria.id.3087	2	233929283	rs3935584	T	C	-0.052348451	0.011566041	-4.478947295	7.50E-06	15166	24
5600	class.Deltaproteobacteria.id.3087	9	81837587	rs17791393	A	G	-0.067258362	0.015233368	-4.459089092	8.23E-06	15071	23
5601	class.Deltaproteobacteria.id.3087	15	96156368	rs4321143	A	G	-0.056728243	0.012936307	-4.429445551	9.45E-06	15167	24
5621	class.Deltaproteobacteria.id.3087	8	57867671	rs55744759	G	A	-0.077969339	0.017073844	-4.484348709	7.31E-06	15168	24
5622	class.Deltaproteobacteria.id.3087	8	57865378	rs72647048	C	T	-0.07781647	0.017073835	-4.484253074	7.32E-06	15168	24
5644	class.Deltaproteobacteria.id.3087	8	57863344	rs12546457	A	G	-0.076950607	0.017196958	-4.451340046	8.53E-06	15165	24
5652	class.Deltaproteobacteria.id.3087	8	57868228	rs2873556	A	G	-0.076707853	0.017027387	-4.433103473	9.29E-06	15165	24
5653	class.Deltaproteobacteria.id.3087	8	57867843	rs72647049	A	G	-0.076074084	0.016957464	-4.426865928	9.56E-06	15164	24
5664	class.Deltaproteobacteria.id.3087	8	57864117	rs35912151	A	T	-0.076665185	0.017075015	-4.418191946	9.95E-06	15168	24
6047	class.Erysipelotrichia.id.2147	8	38803551	rs62504403	T	C	0.068115892	0.012788339	5.305661665	1.12E-07	16981	22
6048	class.Erysipelotrichia.id.2147	8	38805049	rs11990200	G	A	0.066610463	0.012888321	5.16732797	2.37E-07	16874	21
6049	class.Erysipelotrichia.id.2147	8	38805481	rs11990327	G	A	0.066576263	0.012841092	5.161479095	2.45E-07	16981	22
6050	class.Erysipelotrichia.id.2147	8	38802256	rs62504402	C	T	0.065560764	0.012820031	5.130986226	2.88E-07	16874	21
6051	class.Erysipelotrichia.id.2147	8	38795647	rs62504370	C	A	0.063482832	0.01264996	5.034287045	4.80E-07	17285	22
6052	class.Erysipelotrichia.id.2147	18	5830507	rs7234058	C	T	-0.094575892	0.019409083	-4.909660622	9.12E-07	16874	21
6053	class.Erysipelotrichia.id.2147	18	5829720	rs79996147	A	T	-0.09426939	0.019406185	-4.897322756	9.72E-07	16874	21
6054	class.Erysipelotrichia.id.2147	13	40385457	rs17530232	G	A	0.103049982	0.022464754	4.685613075	2.79E-06	16622	20
6055	class.Erysipelotrichia.id.2147	3	195793712	rs2300774	A	G	0.052415201	0.010678379	4.913320679	8.95E-07	18216	24
6056	class.Erysipelotrichia.id.2147	18	5827643	rs79329601	C	T	-0.092974229	0.019403385	-4.825271047	1.40E-06	16874	21
6057	class.Erysipelotrichia.id.2147	3	195793339	rs2300775	C	T	0.052224984	0.010678443	4.896011441	9.78E-07	18216	24
6058	class.Erysipelotrichia.id.2147	18	5824394	rs76420385	G	A	-0.09286071	0.01938762	-4.81513998	1.47E-06	16874	21
6059	class.Erysipelotrichia.id.2147	3	195794241	rs9858727	T	A	0.052019254	0.010679055	4.875922742	1.08E-06	18216	24
6060	class.Erysipelotrichia.id.2147	18	5826346	rs78782849	C	T	-0.092494576	0.019400419	-4.79674899	1.61E-06	16874	21
6061	class.Erysipelotrichia.id.2147	3	195790811	rs2300777	C	A	0.051861332	0.010677373	4.859373137	1.18E-06	18216	24
6062	class.Erysipelotrichia.id.2147	3	195790291	rs2300780	C	T	0.052002527	0.01067706	4.87303753	1.10E-06	18216	24
6063	class.Erysipelotrichia.id.2147	3	195790737	rs2300778	G	A	0.05153802	0.010677555	4.829114277	1.37E-06	18216	24
6064	class.Erysipelotrichia.id.2147	17	70327224	rs35161940	C	T	-0.080604056	0.01676409	-4.769690104	1.85E-06	18213	24
6065	class.Erysipelotrichia.id.2147	3	195788147	rs2284890	C	T	0.051295765	0.010678021	4.806553497	1.54E-06	18215	24
6066	class.Erysipelotrichia.id.2147	3	195789414	rs2239641	C	T	0.051182005	0.010677143	4.796299245	1.62E-06	18216	24
6067	class.Erysipelotrichia.id.2147	3	195788247	rs2284889	A	G	0.051213473	0.010677553	4.798638006	1.60E-06	18216	24
6068	class.Erysipelotrichia.id.2147	3	195791866	rs9852239	C	T	0.050937047	0.010678871	4.773846523	1.81E-06	18216	24
6069	class.Erysipelotrichia.id.2147	10	133897233	rs10781552	T	C	-0.055221236	0.011607425	-4.722368313	2.33E-06	17789	23
6070	class.Erysipelotrichia.id.2147	3	195789708	rs2239640	T	G	0.05096552	0.01067758	4.775947423	1.79E-06	18216	24
6071	class.Erysipelotrichia.id.2147	3	195787308	rs9846149	G	C	0.05086889	0.010677777	4.766490635	1.87E-06	18216	24
6072	class.Erysipelotrichia.id.2147	3	195788555	rs9863872	G	T	0.05088213	0.010677455	4.767489077	1.87E-06	18216	24
6073	class.Erysipelotrichia.id.2147	3	195831098	rs9867473	C	A	0.050032266	0.010704582	4.720097799	2.36E-06	18089	23
6074	class.Erysipelotrichia.id.2147	3	195800603	rs9859401	A	C	0.050037012	0.010679109	4.692099226	2.70E-06	18217	24
6075	class.Erysipelotrichia.id.2147	3	195795439	rs2300773	A	G	0.049967189	0.010679501	4.683372438	2.82E-06	18216	24
6076	class.Erysipelotrichia.id.2147	3	195800267	rs13072608	T	C	0.049791567	0.010678728	4.667148715	3.05E-06	18217	24
6077	class.Erysipelotrichia.id.2147	3	195797947	rs3761717	C	G	0.049618588	0.010679098	4.650918347	3.30E-06	18217	24
6078	class.Erysipelotrichia.id.2147	14	56156504	rs8003149	T	C	0.053879756	0.01168879	4.60702288	4.08E-06	18213	24
6079	class.Erysipelotrichia.id.2147	3	195797553	rs11718657	A	C	0.04953511	0.01067984	4.64491355	3.40E-06	18217	24
6080	class.Erysipelotrichia.id.2147	3	195797576	rs11185506	C	G	0.04953511	0.01067984	4.64491355	3.40E-06	18217	24
6081	class.Erysipelotrichia.id.2147	10	133898263	rs7095708	T	C	-0.053272747	0.011471041	-4.610631079	4.01E-06	18197	24
6082	class.Erysipelotrichia.id.2147	10	133898421	rs4617508	T	A	-0.053247449	0.011472693	-4.609392962	4.04E-06	18197	24
6083	class.Erysipelotrichia.id.2147	10	133894405	rs55764236	T	G	-0.053930503	0.011604645	-4.616925297	3.89E-06	17789	23
6084	class.Erysipelotrichia.id.2147	10	133896369	rs7911287	G	T	-0.053221634	0.011471585	-4.609640819	4.03E-06	18198	24
6085	class.Erysipelotrichia.id.2147	3	195802366	rs9877119	G	A	0.049322986	0.010679101	4.625099246	3.74E-06	18217	24
6086	class.Erysipelotrichia.id.2147	3	195800547	rs9859260	T	C	0.049407509	0.010679102	4.6317059	3.63E-06	18217	24
6087	class.Erysipelotrichia.id.2147	10	133894256	rs12357537	T	C	-0.053775338	0.011605692	-4.603482624	4.15E-06	17789	23
6088	class.Erysipelotrichia.id.2147	14	48997206	rs4078432	T	C	-0.060892934	0.013376363	-4.599698061	4.23E-06	17789	23
6089	class.Erysipelotrichia.id.2147	3	195807607	rs3804140	C	T	0.048829553	0.010679109	4.578719879	4.68E-06	18215	24
6090	class.Erysipelotrichia.id.2147	3	195798522	rs9990392	T	C	0.048565597	0.010688157	4.56737721	4.94E-06	18215	24
6091	class.Erysipelotrichia.id.2147	3	195807625	rs3804139	C	T	0.048642855	0.010679078	4.561645387	5.08E-06	18215	24
6092	class.Erysipelotrichia.id.2147	5	3002546	rs1074800	G	A	0.049243827	0.010887044	4.521309241	6.15E-06	17789	23
6093	class.Erysipelotrichia.id.2147	14	80357610	rs56970041	G	T	0.072414447	0.016447064	4.548481456	5.40E-06	18217	24
6094	class.Erysipelotrichia.id.2147	5	3004396	rs921306	C	T	0.049386593	0.010912671	4.487825064	7.20E-06	17789	23
6095	class.Erysipelotrichia.id.2147	10	133903944	rs11146160	A	G	-0.052077639	0.01147103	-4.51052848	6.47E-06	18204	24
6096	class.Erysipelotrichia.id.2147	3	195798600	rs34221479	C	T	0.048657946	0.01070111	4.533944575	5.79E-06	18108	23
6097	class.Erysipelotrichia.id.2147	10	133901250	rs12258727	T	C	-0.051987626	0.011477017	-4.498075907	6.86E-06	18201	24
6098	class.Erysipelotrichia.id.2147	18	5800225	rs8096144	C	G	-0.08560585	0.01917557	-4.427458915	9.53E-06	17405	23
6099	class.Erysipelotrichia.id.2147	8	2954952	rs7826267	G	T	-0.083907147	0.019913089	-4.433199344	9.28E-06	17586	22
6100	class.Erysipelotrichia.id.2147	3	195792905	rs9852883	C	A	0.04773404	0.010564419	4.514914438	6.33E-06	18109	23
6101	class.Erysipelotrichia.id.2147	10	133897052	rs7906464	T	A	-0.053151344	0.011893027	-4.483345404	7.35E-06	17789	23
6102	class.Erysipelotrichia.id.2147	3	195804298	rs41300431	G	A	0.047884164	0.010678908	4.489979297	7.12E-06	18216	24
6103	class.Erysipelotrichia.id.2147	3	195804344	rs35587059	C	T	0.047907081	0.010682039	4.489798403	7.13E-06	18207	24
6104	class.Erysipelotrichia.id.2147	14	56151603	rs28703642	G	T	0.052530242	0.011796393	4.475119694	7.64E-06	18217	24
6105	class.Erysipelotrichia.id.2147	10	133893637	rs7100916	T	G	-0.052755835	0.011879777	-4.475618572	7.62E-06	17789	23
6106	class.Erysipelotrichia.id.2147	14	80359465	rs10144017	G	A	0.068713766	0.01607705	4.45227969	8.50E-06	18217	24
6107	class.Erysipelotrichia.id.2147	10	133894421	rs61865709	G	A	-0.052663954	0.011877524	-4.465092756	8.00E-06	17789	23
6109	class.Erysipelotrichia.id.2147	1	64139196	rs1884466	T	C	-0.047536345	0.01069386	-4.427639255	9.53E-06	18205	24
6110	class.Erysipelotrichia.id.2147	1	97457427	rs290833	G	T	-0.049737371	0.011137647	-4.464409174	8.03E-06	17789	23
6111	class.Erysipelotrichia.id.2147	14	80356644	rs10134361	G	A	0.070962439	0.016435552	4.448241417	8.66E-06	18217	24
6112	class.Erysipelotrichia.id.2147	17	70329152	rs12938302	C	T	-0.075155776	0.016755651	-4.435848882	9.17E-06	18207	24
6117	class.Erysipelotrichia.id.2147	3	195805510	rs2638904	A	G	0.047215331	0.010677689	4.425176502	9.64E-06	18215	24
6518	class.Gammaproteobacteria.id.3303	2	167986992	rs6706173	C	A	0.074250965	0.014639234	5.199807093	1.99E-07	16020	24
6519	class.Gammaproteobacteria.id.3303	2	167987270	rs6432975	C	G	0.074106513	0.014619366	5.197349942	2.02E-07	16020	24
6520	class.Gammaproteobacteria.id.3303	2	167984952	rs11899748	C	T	0.073973853	0.014640652	5.183422634	2.18E-07	16020	24
6521	class.Gammaproteobacteria.id.3303	2	167983329	rs56730065	A	G	0.073274562	0.014652515	5.128971379	2.91E-07	16020	24
6522	class.Gammaproteobacteria.id.3303	2	167966172	rs7572454	G	A	0.072009748	0.014342774	5.097779798	3.44E-07	16024	24
6523	class.Gammaproteobacteria.id.3303	2	167982976	rs6432974	G	T	0.072714643	0.014678002	5.095631493	3.48E-07	16019	24
6524	class.Gammaproteobacteria.id.3303	2	167962595	rs12105903	C	T	0.069760947	0.01447087	4.925730241	8.40E-07	16024	24
6525	class.Gammaproteobacteria.id.3303	2	167968777	rs67269716	G	A	0.069427787	0.014427108	4.912431625	9.00E-07	16023	24
6526	class.Gammaproteobacteria.id.3303	2	167961501	rs7580360	A	G	0.069631892	0.014500451	4.915127518	8.87E-07	16024	24
6527	class.Gammaproteobacteria.id.3303	12	43572952	rs11181912	A	G	-0.057915255	0.011879636	-4.892671813	9.95E-07	16017	24
6528	class.Gammaproteobacteria.id.3303	2	167969755	rs7586785	C	G	0.069207073	0.014443378	4.896520459	9.75E-07	16023	24
6529	class.Gammaproteobacteria.id.3303	2	167972002	rs9967718	G	A	0.068956531	0.014448256	4.876899414	1.08E-06	16023	24
6530	class.Gammaproteobacteria.id.3303	2	167961469	rs7606905	C	T	0.068128004	0.014518036	4.813703325	1.48E-06	16024	24
6531	class.Gammaproteobacteria.id.3303	2	167951599	rs59250079	T	G	0.070023467	0.014746237	4.826600419	1.39E-06	16022	24
6532	class.Gammaproteobacteria.id.3303	2	167956600	rs61084716	T	G	0.069473102	0.014755346	4.809223656	1.52E-06	16024	24
6533	class.Gammaproteobacteria.id.3303	2	167961457	rs7607028	G	A	0.067951387	0.014512642	4.792892119	1.64E-06	16025	24
6534	class.Gammaproteobacteria.id.3303	2	167983947	rs67074513	T	C	0.062820873	0.01333409	4.767471895	1.87E-06	16020	24
6535	class.Gammaproteobacteria.id.3303	12	43573196	rs17092798	G	A	-0.063750556	0.01354279	-4.764973462	1.89E-06	16019	24
6536	class.Gammaproteobacteria.id.3303	2	167977506	rs10497315	A	G	0.066695287	0.014425193	4.745596918	2.08E-06	16024	24
6537	class.Gammaproteobacteria.id.3303	2	167977928	rs12619579	G	A	0.066730327	0.014465285	4.735704457	2.18E-06	16023	24
6538	class.Gammaproteobacteria.id.3303	2	167959943	rs1429930	C	G	0.068647204	0.014785232	4.739140544	2.15E-06	16024	24
6539	class.Gammaproteobacteria.id.3303	12	43579008	rs1849782	G	A	-0.062878848	0.013538882	-4.713749112	2.43E-06	16025	24
6540	class.Gammaproteobacteria.id.3303	2	167965317	rs1346722	T	C	0.061213335	0.013316347	4.654440917	3.25E-06	16021	24
6541	class.Gammaproteobacteria.id.3303	12	43574431	rs61926436	A	C	-0.062335351	0.013542578	-4.664187172	3.10E-06	16020	24
6542	class.Gammaproteobacteria.id.3303	2	167989691	rs7569147	G	A	0.064627871	0.013982687	4.670235694	3.01E-06	16019	24
6543	class.Gammaproteobacteria.id.3303	2	167994684	rs998899	C	T	0.060398861	0.013318796	4.60402718	4.14E-06	16019	24
6544	class.Gammaproteobacteria.id.3303	18	48185248	rs79795896	G	A	-0.159209919	0.03513731	-4.467225985	7.92E-06	7577	11
6545	class.Gammaproteobacteria.id.3303	2	167951368	rs7589167	C	T	0.066937455	0.014780058	4.621305114	3.81E-06	16022	24
6546	class.Gammaproteobacteria.id.3303	12	43581947	rs10467189	T	C	-0.061896571	0.013527238	-4.641163075	3.46E-06	16025	24
6547	class.Gammaproteobacteria.id.3303	10	48385682	rs2234691	C	T	0.076290532	0.017196192	4.454914973	8.39E-06	16011	24
6548	class.Gammaproteobacteria.id.3303	8	115123937	rs6469506	A	T	0.054142416	0.011633307	4.651842907	3.29E-06	16023	24
6549	class.Gammaproteobacteria.id.3303	8	115126270	rs4421375	C	T	0.054108308	0.011673386	4.633563489	3.59E-06	16024	24
6550	class.Gammaproteobacteria.id.3303	8	115123007	rs12545601	A	C	0.053924378	0.011624253	4.629999036	3.66E-06	16025	24
6551	class.Gammaproteobacteria.id.3303	8	115146828	rs1399856	C	A	0.053913639	0.01167168	4.613259423	3.96E-06	16022	24
6552	class.Gammaproteobacteria.id.3303	8	115175017	rs6984998	C	T	-0.055811147	0.012138407	-4.622547166	3.79E-06	16025	24
6553	class.Gammaproteobacteria.id.3303	1	186502694	rs12404135	G	A	-0.078884268	0.017241506	-4.442430132	8.89E-06	15231	23
6554	class.Gammaproteobacteria.id.3303	1	186501914	rs12089016	C	A	-0.078751499	0.017241321	-4.427579789	9.53E-06	15232	23
6555	class.Gammaproteobacteria.id.3303	12	43579716	rs12827899	G	C	-0.060659281	0.013536384	-4.54706667	5.44E-06	16020	24
6556	class.Gammaproteobacteria.id.3303	2	167947111	rs12692857	G	A	0.065122898	0.014738682	4.513087502	6.39E-06	16019	24
6557	class.Gammaproteobacteria.id.3303	8	115123578	rs7000905	C	T	0.05341516	0.011630006	4.592179739	4.39E-06	16025	24
6559	class.Gammaproteobacteria.id.3303	2	167948116	rs10171261	G	A	0.064755378	0.014737379	4.497880668	6.86E-06	16019	24
6561	class.Gammaproteobacteria.id.3303	2	167988499	rs6432976	C	T	0.069640753	0.015760416	4.480758867	7.44E-06	16015	24
6562	class.Gammaproteobacteria.id.3303	8	115096217	rs4281140	G	T	0.053290081	0.011671453	4.548309383	5.41E-06	16024	24
6563	class.Gammaproteobacteria.id.3303	8	115148483	rs13281859	C	T	0.05336291	0.011672261	4.556155828	5.21E-06	16022	24
6565	class.Gammaproteobacteria.id.3303	8	115119439	rs12675001	G	T	0.053292233	0.011626302	4.560661919	5.10E-06	16025	24
6567	class.Gammaproteobacteria.id.3303	18	75633634	rs9973122	A	T	0.074061387	0.016259636	4.500792154	6.77E-06	15650	23
6568	class.Gammaproteobacteria.id.3303	2	167992286	rs6720763	T	C	0.061292335	0.013923307	4.495061858	6.95E-06	16020	24
6569	class.Gammaproteobacteria.id.3303	8	115095516	rs13266408	T	C	0.052984999	0.011624102	4.534167999	5.78E-06	16025	24
6570	class.Gammaproteobacteria.id.3303	8	115160378	rs10111899	C	T	-0.054829795	0.012086903	-4.546306657	5.46E-06	16025	24
6572	class.Gammaproteobacteria.id.3303	8	115119318	rs12679016	A	T	0.053033979	0.011626107	4.537704588	5.69E-06	16025	24
6574	class.Gammaproteobacteria.id.3303	8	115129292	rs6994489	C	A	-0.054940677	0.012096269	-4.549672039	5.37E-06	16024	24
6575	class.Gammaproteobacteria.id.3303	2	167920163	rs60188538	C	T	0.063102529	0.014367779	4.476117357	7.60E-06	16019	24
6576	class.Gammaproteobacteria.id.3303	8	115148110	rs2176115	A	G	-0.054680771	0.012078879	-4.535164113	5.76E-06	16023	24
6579	class.Gammaproteobacteria.id.3303	8	115096120	rs13273646	G	A	0.052611261	0.011629612	4.500436981	6.78E-06	16024	24
6580	class.Gammaproteobacteria.id.3303	8	115120642	rs11775846	G	A	0.052820216	0.011632117	4.523869836	6.07E-06	16025	24
6583	class.Gammaproteobacteria.id.3303	8	115150895	rs6469507	T	C	-0.054798357	0.012166968	-4.51561822	6.31E-06	16023	24
6585	class.Gammaproteobacteria.id.3303	2	167918547	rs16852925	C	G	0.062807452	0.014378025	4.443515832	8.85E-06	16019	24
6586	class.Gammaproteobacteria.id.3303	8	115121081	rs7017964	G	A	0.052595894	0.011633319	4.504632778	6.65E-06	16025	24
6587	class.Gammaproteobacteria.id.3303	8	115168116	rs4548204	A	C	-0.054279129	0.012076955	-4.502292393	6.72E-06	16024	24
6588	class.Gammaproteobacteria.id.3303	8	115135348	rs12550281	A	G	0.052462872	0.011662093	4.488203857	7.18E-06	16024	24
6589	class.Gammaproteobacteria.id.3303	8	115165210	rs10110536	C	T	-0.054264443	0.012085145	-4.500507258	6.78E-06	16025	24
6594	class.Gammaproteobacteria.id.3303	6	137612554	rs9494710	T	C	-0.054967253	0.012092397	-4.584714759	4.55E-06	15650	23
6597	class.Gammaproteobacteria.id.3303	8	115163631	rs4876552	G	C	0.052493129	0.011658779	4.472147127	7.74E-06	16019	24
6598	class.Gammaproteobacteria.id.3303	8	115161706	rs1473985	A	T	-0.05400084	0.012086771	-4.478264396	7.53E-06	16025	24
6599	class.Gammaproteobacteria.id.3303	8	115162971	rs7818533	G	A	0.052413929	0.011664256	4.465581428	7.99E-06	16016	24
6600	class.Gammaproteobacteria.id.3303	8	115167761	rs2357360	T	A	0.052398436	0.011673644	4.470716958	7.80E-06	16022	24
6603	class.Gammaproteobacteria.id.3303	8	115172410	rs13257428	G	A	0.052394094	0.011668711	4.467720295	7.91E-06	16025	24
6607	class.Gammaproteobacteria.id.3303	8	115152596	rs10095416	T	A	-0.054207957	0.012168755	-4.467297079	7.92E-06	16023	24
6625	class.Gammaproteobacteria.id.3303	8	115162781	rs7003100	T	C	-0.05352266	0.0121303	-4.436596053	9.14E-06	16025	24
6633	class.Gammaproteobacteria.id.3303	8	115164764	rs2090256	T	C	-0.05331048	0.012077041	-4.424102824	9.68E-06	16025	24
6634	class.Gammaproteobacteria.id.3303	6	137612394	rs4896254	A	T	-0.053836761	0.012035109	-4.511657624	6.43E-06	15650	23
6659	class.Gammaproteobacteria.id.3303	3	18615903	rs75101789	T	C	0.072901201	0.016300252	4.445031752	8.79E-06	16024	24
7315	class.Lentisphaeria.id.2250	21	21023966	rs2825714	G	A	-0.137410136	0.02892458	-4.783567792	1.72E-06	4734	22
7316	class.Lentisphaeria.id.2250	15	25162535	rs17114848	A	G	0.152376929	0.032433167	4.60835594	4.06E-06	4734	22
7317	class.Lentisphaeria.id.2250	20	61394262	rs77599476	G	A	0.230291775	0.048016811	4.767925577	1.86E-06	3722	14
7318	class.Lentisphaeria.id.2250	7	146795379	rs11770843	T	C	0.109430892	0.023487897	4.763007718	1.91E-06	4705	21
7319	class.Lentisphaeria.id.2250	20	61393859	rs112022900	G	A	0.21844302	0.046131137	4.687832744	2.76E-06	4092	15
7320	class.Lentisphaeria.id.2250	1	11943792	rs72640280	G	A	0.220206945	0.048619648	4.557348316	5.18E-06	3816	16
7321	class.Lentisphaeria.id.2250	9	111086170	rs62570196	T	C	-0.216350467	0.043986577	-4.876607762	1.08E-06	3712	15
7322	class.Lentisphaeria.id.2250	20	61392681	rs45621736	G	A	0.21826549	0.046130773	4.688406255	2.75E-06	4093	15
7326	class.Lentisphaeria.id.2250	7	146812673	rs6951588	T	C	0.104331159	0.023214207	4.475234035	7.63E-06	4728	22
7327	class.Lentisphaeria.id.2250	7	146808977	rs11764871	T	G	0.105796117	0.023346418	4.513221575	6.39E-06	4725	22
7328	class.Lentisphaeria.id.2250	5	94720245	rs2731834	G	C	0.109437835	0.023692997	4.599081581	4.24E-06	4733	22
7329	class.Lentisphaeria.id.2250	7	146798566	rs35004924	A	C	0.104148004	0.023564874	4.512209696	6.42E-06	4701	21
7332	class.Lentisphaeria.id.2250	7	146810428	rs62481809	C	G	0.103422408	0.023285968	4.435108345	9.20E-06	4724	22
7334	class.Lentisphaeria.id.2250	13	20687179	rs2031282	G	A	0.122368503	0.027032933	4.59236071	4.38E-06	4734	22
7336	class.Lentisphaeria.id.2250	5	94692439	rs2546105	T	A	0.106187252	0.023469029	4.50854919	6.53E-06	4734	22
7337	class.Lentisphaeria.id.2250	15	101242690	rs1002941	A	G	0.105025041	0.023348442	4.461248306	8.15E-06	4734	22
7349	class.Lentisphaeria.id.2250	5	94698304	rs1895249	G	T	0.104684142	0.023470985	4.458050151	8.27E-06	4733	22
7366	class.Lentisphaeria.id.2250	3	6223568	rs73113483	A	T	-0.131216985	0.0288713	-4.448097775	8.66E-06	4718	22
7369	class.Lentisphaeria.id.2250	5	94708550	rs1363428	A	G	0.104261164	0.023401637	4.432240221	9.33E-06	4734	22
7370	class.Lentisphaeria.id.2250	5	94690178	rs253710	C	T	0.103759008	0.023454319	4.418219748	9.95E-06	4734	22
7696	class.Melainabacteria.id.1589	3	14306949	rs9864379	C	T	-0.159734555	0.029255297	-5.438915141	5.36E-08	5777	23
7697	class.Melainabacteria.id.1589	3	14306999	rs9830438	A	C	-0.158871275	0.029251764	-5.411232665	6.26E-08	5777	23
7698	class.Melainabacteria.id.1589	3	14308119	rs2005426	C	A	-0.157581437	0.029347522	-5.342424227	9.17E-08	5773	23
7699	class.Melainabacteria.id.1589	3	14307483	rs900188	A	G	-0.157034659	0.029252897	-5.335339056	9.54E-08	5776	23
7700	class.Melainabacteria.id.1589	3	14306561	rs9864035	G	A	-0.152598353	0.029242104	-5.195542703	2.04E-07	5775	23
7701	class.Melainabacteria.id.1589	3	14268381	rs6773199	G	A	-0.149006873	0.028601701	-5.247135292	1.54E-07	5775	23
7702	class.Melainabacteria.id.1589	3	14268744	rs13062781	G	A	-0.145578511	0.028355365	-5.239155039	1.61E-07	5774	23
7703	class.Melainabacteria.id.1589	3	14298628	rs6442436	C	T	-0.151370184	0.029135375	-5.178365782	2.24E-07	5776	23
7704	class.Melainabacteria.id.1589	3	14280171	rs12493406	C	T	-0.154020265	0.029198468	-5.164657199	2.41E-07	5777	23
7705	class.Melainabacteria.id.1589	3	14306171	rs9883109	T	C	-0.151116195	0.02916765	-5.161610568	2.45E-07	5777	23
7706	class.Melainabacteria.id.1589	3	14299101	rs6780959	A	G	-0.15038645	0.029139674	-5.144877721	2.68E-07	5776	23
7707	class.Melainabacteria.id.1589	3	14306519	rs9863760	C	T	-0.148628418	0.028453535	-5.180631908	2.21E-07	5776	23
7708	class.Melainabacteria.id.1589	3	14296762	rs13072729	T	C	-0.150580859	0.02916278	-5.126216808	2.96E-07	5775	23
7709	class.Melainabacteria.id.1589	3	14283539	rs12486770	T	A	-0.152776268	0.029203636	-5.125023388	2.98E-07	5777	23
7710	class.Melainabacteria.id.1589	16	80493705	rs11150282	C	T	0.09894875	0.019697164	4.990288491	6.03E-07	5873	24
7711	class.Melainabacteria.id.1589	3	14282488	rs62231951	A	T	-0.152393901	0.029199974	-5.112519276	3.18E-07	5777	23
7712	class.Melainabacteria.id.1589	3	14287703	rs10510427	G	A	-0.149694612	0.028889554	-5.075710857	3.86E-07	5777	23
7713	class.Melainabacteria.id.1589	3	14301173	rs1010755	C	T	-0.148438946	0.029109537	-5.073853631	3.90E-07	5777	23
7714	class.Melainabacteria.id.1589	3	14303081	rs17039205	A	G	-0.148094931	0.029140734	-5.070076223	3.98E-07	5777	23
7715	class.Melainabacteria.id.1589	3	14303190	rs17039208	T	C	-0.147325007	0.029127393	-5.045067999	4.53E-07	5777	23
7716	class.Melainabacteria.id.1589	3	14270680	rs9832125	C	T	-0.138609873	0.028187837	-5.088057846	3.62E-07	5776	23
7717	class.Melainabacteria.id.1589	3	14270543	rs13084677	A	T	-0.138153708	0.028186765	-5.077715774	3.82E-07	5776	23
7718	class.Melainabacteria.id.1589	16	80490529	rs7206242	C	T	0.099982311	0.020111415	4.921130242	8.60E-07	5880	24
7719	class.Melainabacteria.id.1589	3	14304191	rs13088024	T	A	-0.146073407	0.029132274	-4.986543994	6.15E-07	5777	23
7720	class.Melainabacteria.id.1589	3	14303491	rs13060131	C	T	-0.145724866	0.029133361	-4.976999963	6.46E-07	5777	23
7721	class.Melainabacteria.id.1589	3	14290362	rs13098772	C	A	-0.14684496	0.029157769	-4.973293935	6.58E-07	5775	23
7722	class.Melainabacteria.id.1589	3	14304748	rs12714900	G	T	-0.145314784	0.029132747	-4.966552124	6.82E-07	5777	23
7723	class.Melainabacteria.id.1589	3	14303744	rs12491989	C	G	-0.14541846	0.029190237	-4.958613118	7.10E-07	5777	23
7724	class.Melainabacteria.id.1589	3	14305088	rs12714903	C	T	-0.145054533	0.029137601	-4.956770228	7.17E-07	5777	23
7725	class.Melainabacteria.id.1589	3	14305670	rs13095126	T	C	-0.144742853	0.029132252	-4.943638922	7.67E-07	5777	23
7726	class.Melainabacteria.id.1589	3	14305584	rs13072444	G	A	-0.144636136	0.029132453	-4.940228691	7.80E-07	5777	23
7727	class.Melainabacteria.id.1589	3	14304881	rs12714902	G	A	-0.144491384	0.029135078	-4.937460479	7.91E-07	5777	23
7728	class.Melainabacteria.id.1589	16	80484304	rs7204337	G	A	0.099087649	0.020293854	4.817704402	1.45E-06	5873	24
7729	class.Melainabacteria.id.1589	3	14305836	rs13072505	A	G	-0.145493323	0.029128331	-4.974380936	6.55E-07	5777	23
7730	class.Melainabacteria.id.1589	3	14302318	rs7644367	G	A	-0.143396833	0.029127205	-4.913480845	8.95E-07	5777	23
7731	class.Melainabacteria.id.1589	3	14305341	rs13072044	G	T	-0.147382408	0.030021834	-4.905914912	9.30E-07	5343	22
7732	class.Melainabacteria.id.1589	3	14305775	rs13072359	A	C	-0.14314555	0.029130733	-4.889147965	1.01E-06	5777	23
7733	class.Melainabacteria.id.1589	1	230522960	rs72765665	C	T	-0.08947307	0.018655299	-4.831732927	1.35E-06	5881	24
7734	class.Melainabacteria.id.1589	1	230523039	rs16851659	C	G	-0.089610337	0.01864323	-4.84363222	1.27E-06	5884	24
7735	class.Melainabacteria.id.1589	1	230522961	rs72765667	A	G	-0.088277437	0.01865863	-4.768614471	1.85E-06	5881	24
7736	class.Melainabacteria.id.1589	1	230522978	rs68053172	G	A	-0.088322228	0.018657325	-4.768402527	1.86E-06	5881	24
7737	class.Melainabacteria.id.1589	7	20010624	rs73074665	T	A	0.166215674	0.035572757	4.680191177	2.87E-06	5758	22
7738	class.Melainabacteria.id.1589	9	115975644	rs4129397	A	G	0.089463926	0.018510237	4.805545655	1.54E-06	5886	24
7739	class.Melainabacteria.id.1589	9	115975389	rs4129395	A	G	0.08961869	0.01851058	4.813841652	1.48E-06	5887	24
7740	class.Melainabacteria.id.1589	1	230522690	rs4846956	C	T	-0.087594504	0.01864576	-4.738461437	2.15E-06	5885	24
7741	class.Melainabacteria.id.1589	15	100747683	rs79790072	C	T	0.226721783	0.048784054	4.651825902	3.29E-06	4107	11
7742	class.Melainabacteria.id.1589	9	115975613	rs4129396	A	G	0.088820222	0.01851176	4.769889557	1.84E-06	5886	24
7743	class.Melainabacteria.id.1589	9	26184578	rs10738747	A	G	0.081462422	0.018440929	4.418082555	9.96E-06	5884	24
7744	class.Melainabacteria.id.1589	9	122046549	rs1221147	A	T	0.123968094	0.027895845	4.490447485	7.11E-06	5768	23
7745	class.Melainabacteria.id.1589	9	115977175	rs10739388	T	C	0.087935834	0.018509587	4.722327024	2.33E-06	5887	24
7746	class.Melainabacteria.id.1589	9	115976445	rs7859354	C	T	0.088100977	0.018510374	4.731429625	2.23E-06	5887	24
7747	class.Melainabacteria.id.1589	9	115978038	rs10817461	A	T	0.087543995	0.018511795	4.70311818	2.56E-06	5887	24
7748	class.Melainabacteria.id.1589	2	61450941	rs202201936	C	A	-0.14148256	0.030569645	-4.497407262	6.88E-06	5436	22
7749	class.Melainabacteria.id.1589	1	230524296	rs7549147	G	A	-0.086060042	0.018587397	-4.662362882	3.13E-06	5883	24
7752	class.Melainabacteria.id.1589	9	24648997	rs113884518	C	T	-0.20535201	0.045498234	-4.463671729	8.06E-06	4442	17
7753	class.Melainabacteria.id.1589	18	1008278	rs789069	C	A	-0.103539228	0.023428675	-4.498410305	6.85E-06	5879	24
7756	class.Melainabacteria.id.1589	1	230523609	rs12746891	A	G	-0.084622096	0.018585252	-4.59012644	4.43E-06	5884	24
7759	class.Melainabacteria.id.1589	11	2937631	rs367480	A	G	-0.08375796	0.018579584	-4.459914143	8.20E-06	5887	24
7760	class.Melainabacteria.id.1589	17	53906328	rs28678345	C	T	0.214848361	0.047087794	4.503292067	6.69E-06	4323	15
7780	class.Melainabacteria.id.1589	1	230521031	rs11806158	C	A	-0.081963679	0.01864945	-4.440420815	8.98E-06	5887	24
7806	class.Melainabacteria.id.1589	14	107061448	rs10148250	A	G	0.086192825	0.019338072	4.447900847	8.67E-06	5453	23
8164	class.Methanobacteria.id.119	2	125440268	rs10202904	G	T	-0.121753579	0.023535682	-5.122550862	3.01E-07	3695	16
8165	class.Methanobacteria.id.119	2	125437944	rs7601415	T	A	-0.118706188	0.023544328	-4.987854861	6.11E-07	3692	16
8166	class.Methanobacteria.id.119	2	125437070	rs1869500	A	C	-0.118301043	0.023543069	-4.973625228	6.57E-07	3692	16
8167	class.Methanobacteria.id.119	13	41956181	rs73457410	G	A	0.215339755	0.04366952	4.823790925	1.41E-06	3498	15
8168	class.Methanobacteria.id.119	13	41963791	rs76029318	C	T	0.214769455	0.0446468	4.800302014	1.58E-06	3497	15
8169	class.Methanobacteria.id.119	3	15053083	rs6776814	C	T	-0.199565931	0.04118249	-4.79452384	1.63E-06	3385	14
8170	class.Methanobacteria.id.119	3	15013348	rs62241835	T	G	-0.203385443	0.041793099	-4.794254907	1.63E-06	3383	14
8171	class.Methanobacteria.id.119	3	15051223	rs62240385	T	G	-0.201402461	0.041872954	-4.777523342	1.77E-06	3342	13
8172	class.Methanobacteria.id.119	3	15015333	rs9942108	G	A	-0.20285204	0.042078889	-4.768768983	1.85E-06	3342	13
8173	class.Methanobacteria.id.119	13	41963968	rs73457427	G	A	0.212977879	0.044612759	4.767673048	1.86E-06	3497	15
8174	class.Methanobacteria.id.119	4	104418307	rs894996	A	C	0.216999069	0.044907554	4.766388791	1.88E-06	3582	15
8175	class.Methanobacteria.id.119	2	125446588	rs4848970	G	T	0.115927785	0.024375106	4.764657758	1.89E-06	3696	16
8176	class.Methanobacteria.id.119	3	15049536	rs6784384	G	A	-0.197945753	0.041356125	-4.764133856	1.90E-06	3385	14
8177	class.Methanobacteria.id.119	3	15019595	rs73031978	G	C	-0.203186321	0.042161972	-4.763578786	1.90E-06	3340	13
8178	class.Methanobacteria.id.119	2	125434310	rs12711690	G	A	-0.11317687	0.023546477	-4.756285573	1.97E-06	3691	16
8179	class.Methanobacteria.id.119	3	15049889	rs62240384	C	T	-0.197550382	0.041356794	-4.754537298	1.99E-06	3385	14
8180	class.Methanobacteria.id.119	13	41955162	rs11147839	G	A	0.211421348	0.044498658	4.726638154	2.28E-06	3499	15
8181	class.Methanobacteria.id.119	2	125446861	rs4848258	A	T	-0.112059746	0.023546436	-4.713434986	2.44E-06	3695	16
8182	class.Methanobacteria.id.119	3	15012512	rs62241834	G	T	-0.201007522	0.041935527	-4.712666504	2.44E-06	3383	14
8183	class.Methanobacteria.id.119	3	15006272	rs56209241	G	A	-0.201701153	0.042248048	-4.705767796	2.53E-06	3340	13
8184	class.Methanobacteria.id.119	13	41962188	rs9594530	T	C	0.210213952	0.044587911	4.703919192	2.55E-06	3498	15
8185	class.Methanobacteria.id.119	3	15024811	rs62240373	G	A	-0.199024599	0.04186683	-4.688513507	2.75E-06	3383	14
8186	class.Methanobacteria.id.119	3	15019689	rs62241836	C	T	-0.198963321	0.041878963	-4.682038542	2.84E-06	3383	14
8187	class.Methanobacteria.id.119	2	125432533	rs6541968	T	C	-0.111081696	0.023532588	-4.673753711	2.96E-06	3698	16
8188	class.Methanobacteria.id.119	3	15059784	rs62240388	A	G	-0.19637151	0.041822768	-4.666886824	3.06E-06	3342	13
8189	class.Methanobacteria.id.119	13	41961665	rs3923545	G	C	0.207400474	0.044527126	4.657721626	3.20E-06	3498	15
8190	class.Methanobacteria.id.119	3	15038202	rs62240380	C	T	-0.193329863	0.041311925	-4.649734113	3.32E-06	3385	14
8191	class.Methanobacteria.id.119	3	15058403	rs58106718	A	T	-0.192891113	0.041352842	-4.643366006	3.43E-06	3385	14
8192	class.Methanobacteria.id.119	3	15015341	rs9942109	G	A	-0.196650469	0.041881911	-4.63312745	3.60E-06	3383	14
8193	class.Methanobacteria.id.119	3	15022743	rs56001610	G	A	-0.194912316	0.041821071	-4.587397106	4.49E-06	3383	14
8194	class.Methanobacteria.id.119	3	15056858	rs7635580	G	A	-0.19275865	0.041596181	-4.585516563	4.53E-06	3385	14
8195	class.Methanobacteria.id.119	3	15023497	rs62241845	T	A	-0.194880024	0.041819673	-4.584337771	4.55E-06	3383	14
8196	class.Methanobacteria.id.119	3	15023392	rs62241844	G	C	-0.194880024	0.041819673	-4.584337771	4.55E-06	3383	14
8197	class.Methanobacteria.id.119	3	15006309	rs62241832	G	A	-0.195627597	0.041969171	-4.583382866	4.58E-06	3383	14
8198	class.Methanobacteria.id.119	3	15021128	rs62241837	G	A	-0.194793039	0.041834322	-4.581909081	4.61E-06	3383	14
8199	class.Methanobacteria.id.119	3	15021594	rs62241838	T	C	-0.194727928	0.041821327	-4.581909081	4.61E-06	3383	14
8200	class.Methanobacteria.id.119	3	15022311	rs62241839	A	G	-0.194592044	0.041821366	-4.578849745	4.68E-06	3383	14
8201	class.Methanobacteria.id.119	2	125429006	rs11123059	A	G	-0.108365502	0.023491805	-4.570237783	4.87E-06	3694	16
8202	class.Methanobacteria.id.119	3	15003008	rs62241827	T	G	-0.192528028	0.041742105	-4.550629787	5.35E-06	3383	14
8203	class.Methanobacteria.id.119	3	15004109	rs62241829	C	T	-0.192668119	0.041783091	-4.548829061	5.39E-06	3383	14
8204	class.Methanobacteria.id.119	3	15004048	rs62241828	A	G	-0.19257762	0.041783067	-4.54678142	5.45E-06	3383	14
8205	class.Methanobacteria.id.119	12	21338861	rs75208022	T	C	-0.227244713	0.048763001	-4.529189927	5.92E-06	3203	14
8206	class.Methanobacteria.id.119	3	15035582	rs55721046	A	G	-0.190624276	0.041428935	-4.524162691	6.06E-06	3381	14
8207	class.Methanobacteria.id.119	12	43701132	rs12825290	G	C	-0.216781075	0.049349641	-4.523738926	6.08E-06	3144	12
8208	class.Methanobacteria.id.119	5	178160975	rs56131665	A	G	0.178661188	0.039297982	4.520138571	6.18E-06	3572	15
8209	class.Methanobacteria.id.119	11	89349287	rs11018665	T	A	0.111465287	0.025051554	4.508829011	6.52E-06	3698	16
8210	class.Methanobacteria.id.119	3	15073230	rs62240390	C	G	-0.189174846	0.041557232	-4.500109162	6.79E-06	3385	14
8211	class.Methanobacteria.id.119	3	15001983	rs62241826	T	C	-0.189757473	0.041470754	-4.495210439	6.95E-06	3383	14
8212	class.Methanobacteria.id.119	3	2086167	rs4257531	A	G	0.164498365	0.03649593	4.480597376	7.44E-06	3162	13
8213	class.Methanobacteria.id.119	11	89348133	rs4753222	G	A	0.111055789	0.025052412	4.480454583	7.45E-06	3698	16
8214	class.Methanobacteria.id.119	3	15065308	rs62240389	A	G	-0.187694632	0.041554079	-4.475142509	7.64E-06	3385	14
8215	class.Methanobacteria.id.119	4	104422283	rs74599069	C	A	0.220726198	0.048896049	4.459471593	8.22E-06	3342	12
8216	class.Methanobacteria.id.119	19	28827760	rs6508769	C	T	0.15351913	0.034451866	4.459234474	8.23E-06	3319	15
8217	class.Methanobacteria.id.119	7	10773932	rs73068003	T	G	-0.158140381	0.035180317	-4.453559383	8.45E-06	3692	16
8218	class.Methanobacteria.id.119	12	21336928	rs12303159	C	A	-0.223164363	0.048646714	-4.450681013	8.56E-06	3203	14
8219	class.Methanobacteria.id.119	11	89351188	rs3912664	G	T	0.110224741	0.025054523	4.448057483	8.67E-06	3698	16
8220	class.Methanobacteria.id.119	13	41949961	rs41288287	C	T	0.199438539	0.044425609	4.447117449	8.70E-06	3501	15
8221	class.Methanobacteria.id.119	11	89347010	rs11018664	G	A	0.109896093	0.025054489	4.439987231	9.00E-06	3698	16
8222	class.Methanobacteria.id.119	19	46439321	rs10424197	A	G	-0.111274175	0.024751678	-4.433329849	9.28E-06	3698	16
8223	class.Methanobacteria.id.119	13	41849721	rs9532770	T	C	0.124359228	0.027818327	4.431946357	9.34E-06	3319	15
8224	class.Methanobacteria.id.119	11	89350664	rs10830292	T	G	0.109865232	0.025055265	4.426870966	9.56E-06	3698	16
8225	class.Methanobacteria.id.119	11	89352593	rs4385899	C	T	0.109668997	0.025053836	4.423965505	9.69E-06	3698	16
8226	class.Methanobacteria.id.119	11	89347094	rs10501707	A	G	0.109533453	0.025054714	4.423264168	9.72E-06	3698	16
8227	class.Methanobacteria.id.119	12	21338562	rs73248946	A	G	-0.221805681	0.048725803	-4.42098857	9.83E-06	3203	14
8768	class.Mollicutes.id.3920	14	46519718	rs74603314	C	T	0.221639279	0.046291765	4.80379142	1.56E-06	4499	9
8769	class.Mollicutes.id.3920	5	148784624	rs6867857	C	A	0.122004498	0.026888172	4.71516386	2.42E-06	10391	20
8770	class.Mollicutes.id.3920	8	59440824	rs10108398	A	G	0.076914215	0.015395275	4.87465347	1.09E-06	10932	23
8771	class.Mollicutes.id.3920	2	157520186	rs67374027	T	A	0.075239233	0.015476642	4.89763212	9.70E-07	11389	24
8772	class.Mollicutes.id.3920	2	157532549	rs11890098	G	A	0.074438031	0.015338858	4.900368368	9.57E-07	11392	24
8773	class.Mollicutes.id.3920	11	47103877	rs72901605	C	T	-0.084185237	0.01781192	-4.653852616	3.26E-06	10526	21
8774	class.Mollicutes.id.3920	8	59454408	rs10111506	A	T	0.069089195	0.014238512	4.797952845	1.60E-06	11392	24
8775	class.Mollicutes.id.3920	2	157525027	rs1583268	G	A	0.073250281	0.015349109	4.818467181	1.45E-06	11390	24
8776	class.Mollicutes.id.3920	1	109965986	rs3768491	G	A	-0.068105197	0.01490611	-4.599575976	4.23E-06	11002	23
8777	class.Mollicutes.id.3920	1	109845252	rs638542	A	G	-0.068036144	0.014955512	-4.587503349	4.49E-06	10999	23
8778	class.Mollicutes.id.3920	14	97159674	rs17214486	A	C	0.060989958	0.013562263	4.505917879	6.61E-06	11387	24
8779	class.Mollicutes.id.3920	1	61850864	rs12566890	G	T	-0.101147132	0.023097845	-4.630323303	3.65E-06	11371	24
8780	class.Mollicutes.id.3920	1	109937931	rs12711448	T	C	-0.067896234	0.014907349	-4.586535183	4.51E-06	11002	23
8781	class.Mollicutes.id.3920	8	59454665	rs12674568	A	G	0.069185261	0.014261199	4.797843789	1.60E-06	11392	24
8782	class.Mollicutes.id.3920	2	157532113	rs4325706	C	T	0.072668187	0.015347639	4.78309874	1.73E-06	11392	24
8783	class.Mollicutes.id.3920	8	59455335	rs12680996	T	C	0.068565314	0.014238513	4.761482656	1.92E-06	11392	24
8784	class.Mollicutes.id.3920	8	59458627	rs16923562	A	G	0.0685435	0.014238564	4.761464556	1.92E-06	11392	24
8785	class.Mollicutes.id.3920	11	108439087	rs78169027	G	A	-0.108282943	0.023728915	-4.530798993	5.88E-06	10542	22
8786	class.Mollicutes.id.3920	8	59462283	rs10102709	C	T	0.068961926	0.014261393	4.780703859	1.75E-06	11392	24
8787	class.Mollicutes.id.3920	8	59458704	rs16923564	T	C	0.068447743	0.014238724	4.754391558	1.99E-06	11392	24
8788	class.Mollicutes.id.3920	1	109873573	rs4970749	A	G	-0.067579395	0.014907614	-4.564553862	5.01E-06	11002	23
8789	class.Mollicutes.id.3920	1	109844532	rs652651	G	A	-0.067362662	0.014958974	-4.544890103	5.50E-06	11001	23
8790	class.Mollicutes.id.3920	8	59459972	rs11776003	G	A	0.068397717	0.014238061	4.750845961	2.03E-06	11392	24
8791	class.Mollicutes.id.3920	8	59451173	rs1991359	A	G	0.06827891	0.014237958	4.742014589	2.12E-06	11392	24
8792	class.Mollicutes.id.3920	8	59448217	rs28650441	A	C	0.06829526	0.014242541	4.740986242	2.13E-06	11392	24
8793	class.Mollicutes.id.3920	8	59448796	rs6471729	G	A	0.068112255	0.014233547	4.732382866	2.22E-06	11392	24
8794	class.Mollicutes.id.3920	1	109966718	rs3931560	C	A	-0.067157806	0.014905854	-4.533742985	5.79E-06	11002	23
8795	class.Mollicutes.id.3920	8	59447578	rs7817515	T	G	0.068113951	0.014236631	4.731793135	2.23E-06	11392	24
8796	class.Mollicutes.id.3920	8	59448627	rs7009248	A	G	0.068168037	0.014237455	4.730146371	2.24E-06	11392	24
8797	class.Mollicutes.id.3920	1	109872370	rs11102971	T	C	-0.06709183	0.014907791	-4.532070467	5.84E-06	11002	23
8798	class.Mollicutes.id.3920	1	109873367	rs4970840	G	A	-0.067634089	0.014951326	-4.531621595	5.85E-06	11002	23
8799	class.Mollicutes.id.3920	8	59460434	rs28429491	C	T	0.06790593	0.014239675	4.717067637	2.39E-06	11392	24
8800	class.Mollicutes.id.3920	1	109969721	rs4970754	G	A	-0.066707148	0.014879003	-4.513287596	6.38E-06	11002	23
8801	class.Mollicutes.id.3920	1	109871787	rs10745352	C	T	-0.066968412	0.01490725	-4.521753843	6.13E-06	11002	23
8802	class.Mollicutes.id.3920	2	157526027	rs7590919	G	A	0.071913179	0.015354378	4.729278873	2.25E-06	11387	24
8803	class.Mollicutes.id.3920	2	157540194	rs13024040	C	T	0.073712573	0.015679675	4.741021786	2.13E-06	11374	24
8804	class.Mollicutes.id.3920	1	109986672	rs6664236	A	C	-0.066552128	0.014876456	-4.50186607	6.74E-06	10994	23
8806	class.Mollicutes.id.3920	2	157511441	rs13025440	T	G	0.074959964	0.015889921	4.733079418	2.21E-06	11374	24
8807	class.Mollicutes.id.3920	8	59450071	rs55774738	T	C	0.067449209	0.01420576	4.699104893	2.61E-06	11391	24
8808	class.Mollicutes.id.3920	8	59468651	rs7825996	A	T	0.068313782	0.014345388	4.700474075	2.60E-06	11390	24
8809	class.Mollicutes.id.3920	8	59456607	rs7014398	C	T	0.067838932	0.014261078	4.704329236	2.55E-06	11392	24
8810	class.Mollicutes.id.3920	2	157525233	rs1583269	C	G	0.071559118	0.015393307	4.698360288	2.62E-06	11390	24
8811	class.Mollicutes.id.3920	1	109962642	rs10858095	C	G	-0.066347509	0.014909671	-4.478691724	7.51E-06	11002	23
8812	class.Mollicutes.id.3920	8	59469275	rs72647435	G	T	0.068159635	0.014349004	4.687834334	2.76E-06	11390	24
8813	class.Mollicutes.id.3920	1	109870859	rs6695482	G	C	-0.066357986	0.014906904	-4.479932881	7.47E-06	11002	23
8814	class.Mollicutes.id.3920	8	59485759	rs10099153	C	G	0.068070934	0.014349518	4.682799273	2.83E-06	11389	24
8815	class.Mollicutes.id.3920	2	157536578	rs13027493	T	A	0.071320215	0.015352849	4.691836091	2.71E-06	11391	24
8816	class.Mollicutes.id.3920	8	59458402	rs9297995	C	T	0.067055382	0.014205039	4.670629194	3.00E-06	11391	24
8817	class.Mollicutes.id.3920	8	59464692	rs10113750	C	T	0.067047051	0.014230277	4.660974401	3.15E-06	11392	24
8818	class.Mollicutes.id.3920	1	109961965	rs7551176	T	C	-0.066628764	0.014949888	-4.461457232	8.14E-06	11002	23
8819	class.Mollicutes.id.3920	1	109950858	rs10858094	C	T	-0.065989299	0.01490416	-4.461790917	8.13E-06	11002	23
8820	class.Mollicutes.id.3920	8	59469053	rs12335008	T	A	0.067850227	0.014349536	4.665144983	3.08E-06	11390	24
8821	class.Mollicutes.id.3920	1	109960270	rs10745356	A	C	-0.066455126	0.014951342	-4.448574421	8.64E-06	11002	23
8822	class.Mollicutes.id.3920	1	109958035	rs1465607	C	T	-0.06648083	0.014949923	-4.450046536	8.59E-06	11002	23
8823	class.Mollicutes.id.3920	13	73170489	rs4885016	C	T	-0.081960567	0.018162779	-4.485630537	7.27E-06	11388	24
8824	class.Mollicutes.id.3920	1	109937916	rs12711447	T	C	-0.066641718	0.014951675	-4.462528085	8.10E-06	11002	23
8825	class.Mollicutes.id.3920	8	59448600	rs7009374	C	T	0.06683656	0.014205022	4.653938731	3.26E-06	11391	24
8826	class.Mollicutes.id.3920	8	59478980	rs10099912	G	T	0.067773319	0.014351569	4.661230171	3.14E-06	11390	24
8827	class.Mollicutes.id.3920	1	109849144	rs417270	C	T	-0.065981611	0.014914133	-4.449764678	8.60E-06	11000	23
8828	class.Mollicutes.id.3920	8	59456014	rs10090964	A	T	0.066757012	0.01421159	4.645360049	3.39E-06	11391	24
8829	class.Mollicutes.id.3920	1	109956156	rs10776807	A	G	-0.0657475	0.014910169	-4.437014318	9.12E-06	11002	23
8830	class.Mollicutes.id.3920	1	109850122	rs367586	A	C	-0.06592386	0.01491236	-4.445449225	8.77E-06	11000	23
8831	class.Mollicutes.id.3920	8	59475414	rs7011095	T	A	0.067546238	0.014350675	4.644552875	3.41E-06	11390	24
8832	class.Mollicutes.id.3920	1	109849254	rs443345	G	A	-0.065795712	0.014913646	-4.437174965	9.11E-06	11000	23
8833	class.Mollicutes.id.3920	8	59472582	rs59979442	A	G	0.067488652	0.014349873	4.643071172	3.43E-06	11390	24
8834	class.Mollicutes.id.3920	15	95309676	rs28537087	A	G	0.08208727	0.018831168	4.463212567	8.07E-06	11382	24
8835	class.Mollicutes.id.3920	1	109866844	rs12136140	A	G	-0.065641765	0.014908836	-4.433350844	9.28E-06	11000	23
8836	class.Mollicutes.id.3920	8	59473938	rs12676593	A	G	0.06744622	0.014349699	4.639433398	3.49E-06	11390	24
8837	class.Mollicutes.id.3920	8	59481292	rs10094910	T	C	0.066700245	0.01422356	4.632472517	3.61E-06	11390	24
8838	class.Mollicutes.id.3920	1	109943893	rs10858092	T	C	-0.065482547	0.014906241	-4.430643012	9.40E-06	11002	23
8839	class.Mollicutes.id.3920	1	109867929	rs11102969	A	G	-0.065585812	0.014906985	-4.42961286	9.44E-06	11002	23
8840	class.Mollicutes.id.3920	2	157538941	rs13015145	G	A	0.070553003	0.015361691	4.642227056	3.45E-06	11392	24
8841	class.Mollicutes.id.3920	8	59475078	rs28809811	G	T	0.067879129	0.014528764	4.604996351	4.12E-06	11385	24
8848	class.Mollicutes.id.3920	2	157535371	rs13020096	T	C	0.064003136	0.014170794	4.546021911	5.47E-06	11392	24
8851	class.Mollicutes.id.3920	8	59460978	rs6981601	C	T	0.066140162	0.014205007	4.60903125	4.05E-06	11391	24
8854	class.Mollicutes.id.3920	2	157533704	rs11678196	A	G	0.063913779	0.014170234	4.540584595	5.61E-06	11392	24
8856	class.Mollicutes.id.3920	8	59461621	rs6986129	A	T	0.06605302	0.014206218	4.601742266	4.19E-06	11391	24
8858	class.Mollicutes.id.3920	8	59496052	rs3739327	G	A	0.065835688	0.014420405	4.535341344	5.75E-06	10932	23
8859	class.Mollicutes.id.3920	7	79490250	rs2464826	C	A	0.094423946	0.021180616	4.454853483	8.40E-06	10998	23
8861	class.Mollicutes.id.3920	8	59477946	rs11783174	G	T	0.066838375	0.014352024	4.59467911	4.33E-06	11390	24
8862	class.Mollicutes.id.3920	2	157502466	rs12476593	C	G	0.073331519	0.01592901	4.619611597	3.84E-06	11371	24
8865	class.Mollicutes.id.3920	8	59478423	rs10111052	T	G	0.065923061	0.014224201	4.577612664	4.70E-06	11390	24
8870	class.Mollicutes.id.3920	20	16259524	rs6043847	C	T	-0.11493717	0.024860602	-4.584315362	4.55E-06	11130	21
8877	class.Mollicutes.id.3920	8	59489542	rs4282557	C	T	0.064675291	0.014202744	4.50019888	6.79E-06	11389	24
8878	class.Mollicutes.id.3920	8	59487656	rs10085973	C	G	0.064737937	0.014201948	4.503505995	6.68E-06	11390	24
8889	class.Mollicutes.id.3920	8	59485696	rs10099240	G	C	0.064651768	0.014199758	4.49505227	6.96E-06	11390	24
8898	class.Mollicutes.id.3920	2	157527653	rs13025367	C	G	0.062597896	0.014171196	4.451524601	8.53E-06	11392	24
8901	class.Mollicutes.id.3920	2	157539961	rs10497163	G	T	0.068989254	0.015392612	4.528572045	5.94E-06	11392	24
8912	class.Mollicutes.id.3920	2	157524035	rs13023735	A	G	0.062519879	0.01417931	4.443203762	8.86E-06	11389	24
8915	class.Mollicutes.id.3920	8	59479767	rs10504256	G	A	0.063315113	0.014084086	4.440817449	8.96E-06	11390	24
8924	class.Mollicutes.id.3920	8	59468464	rs7843989	T	G	0.063472289	0.014163225	4.427097306	9.55E-06	11390	24
8928	class.Mollicutes.id.3920	8	59484899	rs7827910	T	A	0.063454255	0.014168168	4.426754131	9.57E-06	11389	24
8932	class.Mollicutes.id.3920	8	59432477	rs10097590	G	A	0.067231016	0.014737003	4.451650306	8.52E-06	11391	24
8953	class.Mollicutes.id.3920	2	157493292	rs67450615	T	G	0.071799353	0.016277928	4.430450744	9.40E-06	11374	24
8955	class.Mollicutes.id.3920	20	16259265	rs12480021	G	A	-0.110567477	0.024949294	-4.427088244	9.55E-06	11130	21
8960	class.Mollicutes.id.3920	20	16258287	rs74338080	C	G	-0.110313845	0.024933907	-4.418241215	9.95E-06	11130	21
9412	class.Negativicutes.id.2164	5	165266628	rs1643968	C	T	-0.056528439	0.011229806	-5.062130941	4.15E-07	18170	24
9413	class.Negativicutes.id.2164	16	21249925	rs60274479	C	T	-0.065962286	0.013413689	-4.861958016	1.16E-06	17610	22
9414	class.Negativicutes.id.2164	5	165266083	rs2921533	A	G	-0.05437631	0.011185914	-4.888322327	1.02E-06	18171	24
9415	class.Negativicutes.id.2164	3	142135117	rs13086907	A	G	0.062531199	0.013173503	4.758034029	1.95E-06	18163	24
9416	class.Negativicutes.id.2164	4	17413426	rs73232831	A	G	-0.151828859	0.03149318	-4.766501422	1.87E-06	9382	11
9417	class.Negativicutes.id.2164	15	101245088	rs71405394	A	G	-0.114177822	0.02404996	-4.737256816	2.17E-06	13861	16
9418	class.Negativicutes.id.2164	9	124912908	rs61249479	C	A	0.077707533	0.01686282	4.673943117	2.95E-06	18165	24
9419	class.Negativicutes.id.2164	8	41231597	rs1447205	C	G	-0.050205329	0.010838203	-4.67544014	2.93E-06	18165	24
9420	class.Negativicutes.id.2164	3	142217069	rs34660854	G	A	0.061312192	0.013343315	4.59850667	4.26E-06	18169	24
9421	class.Negativicutes.id.2164	8	41232686	rs72643860	A	G	-0.049941651	0.010836571	-4.647887017	3.35E-06	18166	24
9422	class.Negativicutes.id.2164	8	41231340	rs4236917	G	C	-0.049424941	0.010838451	-4.603654054	4.15E-06	18165	24
9423	class.Negativicutes.id.2164	8	41231202	rs4736971	C	A	-0.049422009	0.010838158	-4.601818217	4.19E-06	18165	24
9424	class.Negativicutes.id.2164	7	22817571	rs4722181	G	T	0.050130576	0.010579796	4.753310745	2.00E-06	18163	24
9425	class.Negativicutes.id.2164	16	21243950	rs9929374	A	G	-0.050350738	0.010749489	-4.663246197	3.11E-06	18171	24
9426	class.Negativicutes.id.2164	8	41231960	rs2354569	T	C	-0.049318198	0.010837955	-4.592107538	4.39E-06	18166	24
9427	class.Negativicutes.id.2164	7	22820157	rs35924322	A	G	0.049504189	0.010563688	4.701947716	2.58E-06	18170	24
9428	class.Negativicutes.id.2164	7	22818102	rs35797647	C	G	0.049583163	0.010565583	4.710569131	2.47E-06	18171	24
9429	class.Negativicutes.id.2164	7	22817896	rs56371515	G	C	0.049589814	0.010567142	4.710563932	2.47E-06	18164	24
9430	class.Negativicutes.id.2164	16	21252765	rs56188349	C	T	-0.06416642	0.013883829	-4.590944256	4.41E-06	17610	22
9431	class.Negativicutes.id.2164	7	22814077	rs12113541	A	G	0.049222058	0.010551217	4.652762285	3.28E-06	18163	24
9432	class.Negativicutes.id.2164	3	142163044	rs34058443	T	C	0.059565755	0.013194112	4.513674398	6.37E-06	18162	24
9433	class.Negativicutes.id.2164	7	22819391	rs35636125	A	G	0.049027647	0.010565052	4.656631377	3.21E-06	18171	24
9434	class.Negativicutes.id.2164	7	22814891	rs34884022	A	G	0.048986448	0.01055177	4.633185138	3.60E-06	18164	24
9435	class.Negativicutes.id.2164	7	22814396	rs12112489	C	T	0.048845289	0.010551494	4.620067986	3.84E-06	18171	24
9436	class.Negativicutes.id.2164	10	115597993	rs4463806	C	T	-0.05439664	0.012936525	-4.47041991	7.81E-06	18160	24
9437	class.Negativicutes.id.2164	10	5579818	rs9423647	A	G	0.047817029	0.010528201	4.524245342	6.06E-06	18164	24
9438	class.Negativicutes.id.2164	21	34377485	rs2834062	G	A	0.0489057	0.010884164	4.453728035	8.44E-06	18171	24
9439	class.Negativicutes.id.2164	10	115602408	rs10885514	A	G	-0.053322541	0.012867514	-4.450096361	8.58E-06	18165	24
9441	class.Negativicutes.id.2164	10	115598981	rs10787507	C	G	-0.054509754	0.012703778	-4.436624792	9.14E-06	18162	24
9442	class.Negativicutes.id.2164	7	22815905	rs56249650	C	A	0.048135632	0.010551156	4.550715017	5.35E-06	18171	24
9444	class.Negativicutes.id.2164	10	80086072	rs1649999	G	A	0.074898861	0.01664577	4.476682001	7.58E-06	18036	23
9445	class.Negativicutes.id.2164	10	5580628	rs12572508	C	T	0.046779349	0.010524291	4.42634157	9.58E-06	18171	24
9448	class.Negativicutes.id.2164	7	75609677	rs1135612	A	G	0.052978507	0.01191767	4.433697196	9.26E-06	18164	24
9450	class.Negativicutes.id.2164	7	22813802	rs58649672	C	G	0.047295827	0.010553572	4.47119735	7.78E-06	18156	24
9462	class.Negativicutes.id.2164	7	22816903	rs2103109	A	C	0.046797809	0.010564507	4.42135881	9.81E-06	18171	24
9833	class.Verrucomicrobiae.id.4029	4	95027272	rs11729256	C	T	0.074979802	0.015017677	4.968971477	6.73E-07	11861	24
9834	class.Verrucomicrobiae.id.4029	11	130280667	rs4936098	G	A	0.064884253	0.013592809	4.868900397	1.12E-06	11858	24
9835	class.Verrucomicrobiae.id.4029	4	95016155	rs113634144	G	T	0.073690446	0.01501329	4.869967274	1.12E-06	11860	24
9836	class.Verrucomicrobiae.id.4029	6	56341481	rs9349825	G	A	-0.070403566	0.014712789	-4.705144056	2.54E-06	11858	24
9837	class.Verrucomicrobiae.id.4029	4	95059232	rs56161035	C	T	0.068224963	0.014453945	4.723629476	2.32E-06	11865	24
9838	class.Verrucomicrobiae.id.4029	10	5073050	rs11252894	C	A	0.077093323	0.016605195	4.675032708	2.94E-06	11864	24
9839	class.Verrucomicrobiae.id.4029	4	95072730	rs2169719	A	G	0.067805517	0.014532077	4.666914503	3.06E-06	11859	24
9840	class.Verrucomicrobiae.id.4029	10	5076367	rs12416161	C	T	0.076249555	0.016556386	4.639086346	3.50E-06	11864	24
9841	class.Verrucomicrobiae.id.4029	4	100544188	rs74542928	C	T	0.112163707	0.023642195	4.794327123	1.63E-06	11216	22
9842	class.Verrucomicrobiae.id.4029	10	11389614	rs3995795	T	C	0.064127531	0.014099468	4.557136659	5.19E-06	11690	23
9843	class.Verrucomicrobiae.id.4029	4	95070236	rs12498518	C	T	0.066626989	0.014486596	4.614615231	3.94E-06	11865	24
9844	class.Verrucomicrobiae.id.4029	16	81063149	rs2602429	T	C	0.074684437	0.015619438	4.701468957	2.58E-06	11690	23
9845	class.Verrucomicrobiae.id.4029	4	95064162	rs77055143	C	T	0.06672136	0.014483347	4.617623888	3.88E-06	11865	24
9846	class.Verrucomicrobiae.id.4029	10	5064327	rs4242783	A	G	0.068929219	0.014769297	4.697308453	2.64E-06	11690	23
9847	class.Verrucomicrobiae.id.4029	4	95073229	rs12501826	G	C	0.06641649	0.014487656	4.596146537	4.30E-06	11865	24
9848	class.Verrucomicrobiae.id.4029	11	130270855	rs59317921	C	T	0.062798603	0.01375041	4.581408183	4.62E-06	11793	23
9849	class.Verrucomicrobiae.id.4029	4	100542921	rs112769434	A	G	0.111245526	0.0236429	4.737905606	2.16E-06	11216	22
9850	class.Verrucomicrobiae.id.4029	1	105422565	rs11184341	C	G	0.065534193	0.014223078	4.604526701	4.13E-06	11864	24
9851	class.Verrucomicrobiae.id.4029	1	41074472	rs61779207	A	G	-0.075830853	0.016776157	-4.502279537	6.72E-06	11591	23
9852	class.Verrucomicrobiae.id.4029	4	95070166	rs72663787	G	A	0.066262168	0.014534728	4.561634683	5.08E-06	11865	24
9853	class.Verrucomicrobiae.id.4029	4	95077819	rs11724791	G	A	0.066306909	0.014488062	4.570778413	4.86E-06	11865	24
9854	class.Verrucomicrobiae.id.4029	4	95063631	rs1605923	T	G	0.066095974	0.01447299	4.571488358	4.84E-06	11865	24
9855	class.Verrucomicrobiae.id.4029	4	100542167	rs1491244	A	T	0.110727292	0.023632932	4.71044321	2.47E-06	11216	22
9856	class.Verrucomicrobiae.id.4029	4	95061207	rs72663782	G	C	0.065656982	0.014484376	4.550706527	5.35E-06	11865	24
9857	class.Verrucomicrobiae.id.4029	10	5068141	rs12411321	T	C	0.073622806	0.016605787	4.486452635	7.24E-06	11865	24
9858	class.Verrucomicrobiae.id.4029	1	105422965	rs6668273	G	A	0.064872192	0.014222385	4.554105081	5.26E-06	11864	24
9859	class.Verrucomicrobiae.id.4029	1	41074833	rs736124	T	A	-0.074297406	0.016773556	-4.449003753	8.63E-06	11593	23
9860	class.Verrucomicrobiae.id.4029	4	95003498	rs72663756	C	T	0.066451329	0.014714885	4.549102506	5.39E-06	11860	24
9861	class.Verrucomicrobiae.id.4029	1	105418410	rs4294419	G	A	0.063144567	0.01418787	4.460252066	8.19E-06	11864	24
9862	class.Verrucomicrobiae.id.4029	18	49473635	rs117107102	G	A	0.20468288	0.043157251	4.676493858	2.92E-06	4975	9
9863	class.Verrucomicrobiae.id.4029	1	105422681	rs12026127	G	A	0.063756762	0.014205329	4.492122104	7.05E-06	11861	24
9864	class.Verrucomicrobiae.id.4029	4	100544511	rs6832119	A	G	0.109213161	0.023643977	4.642603681	3.44E-06	11216	22
9866	class.Verrucomicrobiae.id.4029	4	95068826	rs2199602	G	T	0.065788434	0.014552197	4.48999945	7.12E-06	11864	24
9867	class.Verrucomicrobiae.id.4029	1	105423732	rs4497215	C	T	0.064242226	0.014223129	4.507788985	6.55E-06	11865	24
9868	class.Verrucomicrobiae.id.4029	1	105424258	rs12045978	G	A	0.06412818	0.014223907	4.497690156	6.87E-06	11865	24
9869	class.Verrucomicrobiae.id.4029	15	97570657	rs12908520	A	G	0.061892558	0.013094626	4.736758778	2.17E-06	11863	24
9870	class.Verrucomicrobiae.id.4029	4	95069794	rs72663785	C	G	0.065621857	0.014550949	4.481641808	7.41E-06	11864	24
9871	class.Verrucomicrobiae.id.4029	4	95017716	rs72663769	T	C	0.065338619	0.014710869	4.480953207	7.43E-06	11861	24
9872	class.Verrucomicrobiae.id.4029	4	95088558	rs28613890	C	T	0.063498761	0.014414867	4.419222787	9.91E-06	11865	24
9873	class.Verrucomicrobiae.id.4029	4	100544867	rs6832927	C	A	0.108321195	0.023643948	4.599565737	4.23E-06	11216	22
9874	class.Verrucomicrobiae.id.4029	4	95086438	rs72663802	C	T	0.06453243	0.014536949	4.453770821	8.44E-06	11865	24
9875	class.Verrucomicrobiae.id.4029	4	95003947	rs4600885	A	C	0.062901491	0.014186057	4.469031953	7.86E-06	11864	24
9876	class.Verrucomicrobiae.id.4029	4	95005995	rs4107636	G	C	0.062915627	0.014184531	4.466511956	7.95E-06	11864	24
9877	class.Verrucomicrobiae.id.4029	1	105429581	rs7538356	A	C	0.063569247	0.014222473	4.461892634	8.12E-06	11864	24
9879	class.Verrucomicrobiae.id.4029	4	95001794	rs72663751	G	A	0.064958956	0.014716297	4.452254159	8.50E-06	11860	24
9882	class.Verrucomicrobiae.id.4029	1	105423672	rs4595371	A	G	0.06344152	0.014223731	4.454306713	8.42E-06	11864	24
9883	class.Verrucomicrobiae.id.4029	4	100545232	rs113653192	C	T	0.107805014	0.023644131	4.578477815	4.68E-06	11216	22
9887	class.Verrucomicrobiae.id.4029	4	95003641	rs28858161	T	C	0.062476695	0.01418593	4.439093347	9.03E-06	11864	24
9888	class.Verrucomicrobiae.id.4029	4	95003642	rs28811282	G	A	0.062467322	0.014185941	4.438460372	9.06E-06	11864	24
9889	class.Verrucomicrobiae.id.4029	1	105428018	rs12024893	A	G	0.063261749	0.014222715	4.440966013	8.96E-06	11864	24
9890	class.Verrucomicrobiae.id.4029	1	105428856	rs36010840	C	T	0.063215294	0.014222953	4.43733353	9.11E-06	11864	24
9891	class.Verrucomicrobiae.id.4029	4	95004279	rs1988252	G	A	0.062430984	0.01419377	4.426983888	9.56E-06	11864	24
9892	class.Verrucomicrobiae.id.4029	4	95004722	rs2865331	G	A	0.062294218	0.014186463	4.424434177	9.67E-06	11864	24
9898	class.Verrucomicrobiae.id.4029	4	100545820	rs7693865	C	T	0.106542741	0.023642892	4.523718215	6.08E-06	11216	22
9914	class.Verrucomicrobiae.id.4029	4	94995064	rs10005131	T	G	0.060548384	0.013753488	4.421429355	9.81E-06	11865	24
9916	class.Verrucomicrobiae.id.4029	4	100546600	rs79837054	T	C	0.105435155	0.023647868	4.476800138	7.58E-06	11216	22
9949	class.Verrucomicrobiae.id.4029	12	130309670	rs111862613	C	T	0.090698957	0.019674596	4.62541648	3.74E-06	11621	22
10031	class.Verrucomicrobiae.id.4029	15	97578967	rs12904881	G	A	0.057911429	0.013143161	4.432942265	9.30E-06	11865	24
10086	class.Verrucomicrobiae.id.4029	20	31867840	rs941682	A	G	-0.063143598	0.014376741	-4.425766881	9.61E-06	11809	23
10503	family.Acidaminococcaceae.id.2166	6	5723181	rs6923842	C	T	-0.079610621	0.016919247	-4.732928636	2.21E-06	11904	23
10504	family.Acidaminococcaceae.id.2166	6	5723227	rs6924018	C	A	-0.079060032	0.016930818	-4.697679735	2.63E-06	11906	23
10505	family.Acidaminococcaceae.id.2166	11	114701288	rs6589457	G	A	0.165910976	0.034951601	4.723773984	2.32E-06	7386	15
10506	family.Acidaminococcaceae.id.2166	9	107117653	rs2933324	G	A	-0.066255706	0.014025652	-4.730764362	2.24E-06	12525	24
10507	family.Acidaminococcaceae.id.2166	6	158647999	rs262812	C	T	-0.065674997	0.014225656	-4.654412665	3.25E-06	12099	23
10508	family.Acidaminococcaceae.id.2166	9	107121855	rs3012351	C	T	-0.065200139	0.01403178	-4.650857132	3.31E-06	12528	24
10509	family.Acidaminococcaceae.id.2166	9	107125805	rs3012352	T	C	-0.064024173	0.014031897	-4.57500315	4.76E-06	12528	24
10510	family.Acidaminococcaceae.id.2166	9	107118315	rs3000667	G	A	-0.064374691	0.014026689	-4.592928209	4.37E-06	12524	24
10511	family.Acidaminococcaceae.id.2166	3	186553389	rs74540770	A	G	-0.108969098	0.024353266	-4.491027408	7.09E-06	10606	20
10512	family.Acidaminococcaceae.id.2166	9	107118050	rs1109873	G	A	-0.063778117	0.014025467	-4.557908604	5.17E-06	12525	24
10513	family.Acidaminococcaceae.id.2166	9	107135084	rs3000673	C	G	-0.063180671	0.014036934	-4.505299949	6.63E-06	12528	24
10514	family.Acidaminococcaceae.id.2166	1	203102563	rs6427992	C	G	-0.059585662	0.012960033	-4.599098093	4.24E-06	12527	24
10516	family.Acidaminococcaceae.id.2166	9	107122545	rs1565606	T	C	-0.062848048	0.014028576	-4.483885378	7.33E-06	12528	24
10517	family.Acidaminococcaceae.id.2166	1	203102728	rs6701725	G	A	-0.058903463	0.012953171	-4.551959988	5.31E-06	12528	24
10518	family.Acidaminococcaceae.id.2166	20	61991833	rs45497800	C	T	-0.117862982	0.025735121	-4.531224478	5.86E-06	11316	20
10524	family.Acidaminococcaceae.id.2166	3	18462531	rs78702810	C	T	-0.143755204	0.032324372	-4.435997767	9.16E-06	7992	13
10832	family.Actinomycetaceae.id.421	6	133007480	rs35011108	G	A	0.24182648	0.050379638	4.771707717	1.83E-06	3630	10
10833	family.Actinomycetaceae.id.421	9	76394568	rs2889192	T	G	0.088753744	0.019500862	4.630708314	3.64E-06	7710	22
10834	family.Actinomycetaceae.id.421	6	67207371	rs34583783	T	G	0.123755794	0.026426988	4.545530195	5.48E-06	7710	22
10835	family.Actinomycetaceae.id.421	12	7954220	rs2110087	G	A	0.078507899	0.017046227	4.588260917	4.47E-06	7710	22
10836	family.Actinomycetaceae.id.421	15	29850991	rs58484246	C	T	0.0761407	0.016900672	4.52205286	6.12E-06	7710	22
10837	family.Actinomycetaceae.id.421	15	29849324	rs56236273	T	A	0.075687546	0.016878716	4.502814859	6.71E-06	7710	22
10838	family.Actinomycetaceae.id.421	12	7955685	rs6488662	T	C	0.080900948	0.017537212	4.607312908	4.08E-06	7710	22
10839	family.Actinomycetaceae.id.421	12	7955561	rs6488660	C	T	0.079513669	0.01744159	4.553853096	5.27E-06	7710	22
10840	family.Actinomycetaceae.id.421	12	7955391	rs6488659	T	C	0.079452189	0.017441403	4.550064724	5.36E-06	7710	22
10841	family.Actinomycetaceae.id.421	12	7955263	rs11055861	A	G	0.079453108	0.017441379	4.54953316	5.38E-06	7710	22
10842	family.Actinomycetaceae.id.421	12	7955193	rs11055860	A	G	0.079434117	0.017440392	4.548504888	5.40E-06	7710	22
10843	family.Actinomycetaceae.id.421	12	7954742	rs7488453	A	G	0.079390354	0.017440808	4.546694577	5.45E-06	7710	22
10844	family.Actinomycetaceae.id.421	15	29851297	rs59800030	C	T	0.075869178	0.016908397	4.502592091	6.71E-06	7710	22
10845	family.Actinomycetaceae.id.421	12	7955052	rs2377095	C	A	0.079311758	0.017441242	4.541839506	5.58E-06	7710	22
10846	family.Actinomycetaceae.id.421	12	7955860	rs6488665	T	C	0.079308915	0.017441697	4.53970518	5.63E-06	7710	22
10847	family.Actinomycetaceae.id.421	6	169224781	rs4073240	A	G	0.074754607	0.016468358	4.524518052	6.05E-06	7710	22
10849	family.Actinomycetaceae.id.421	12	7954035	rs2110088	A	T	0.078856365	0.017438309	4.5126483	6.40E-06	7710	22
10850	family.Actinomycetaceae.id.421	12	7958736	rs7958229	C	T	0.078367716	0.017453622	4.499854676	6.80E-06	7710	22
10852	family.Actinomycetaceae.id.421	12	7954357	rs34951409	C	G	0.07832278	0.017439909	4.485046708	7.29E-06	7710	22
10853	family.Actinomycetaceae.id.421	12	7979715	rs114313061	A	C	0.079845658	0.017549488	4.569415022	4.89E-06	7666	21
10854	family.Actinomycetaceae.id.421	12	7956174	rs12230967	A	G	0.07807473	0.017444324	4.470762095	7.79E-06	7710	22
10856	family.Actinomycetaceae.id.421	12	7958110	rs12831981	T	G	0.077443047	0.017451917	4.443799634	8.84E-06	7710	22
10857	family.Actinomycetaceae.id.421	12	7957968	rs7133400	C	G	0.077321708	0.017451854	4.437148546	9.12E-06	7710	22
10858	family.Actinomycetaceae.id.421	12	7956942	rs11055873	A	G	0.077944986	0.017450772	4.469273483	7.85E-06	7710	22
10859	family.Actinomycetaceae.id.421	12	7982779	rs61937253	C	T	0.079330017	0.017554706	4.537811963	5.68E-06	7666	21
10862	family.Actinomycetaceae.id.421	12	7956968	rs11055874	C	T	0.0773758	0.017449774	4.436653902	9.14E-06	7710	22
10873	family.Actinomycetaceae.id.421	12	7992820	rs35110659	G	T	0.0758383	0.017098242	4.417737241	9.97E-06	7666	21
10890	family.Actinomycetaceae.id.421	13	22375922	rs17072071	A	C	-0.111699275	0.024690509	-4.489685935	7.13E-06	7343	19
11257	family.Alcaligenaceae.id.2875	13	58689340	rs2321387	A	G	-0.056892183	0.011048955	-5.160704896	2.46E-07	16808	24
11258	family.Alcaligenaceae.id.2875	2	239900775	rs62191117	G	A	0.068430199	0.013363598	5.13917787	2.76E-07	16688	23
11259	family.Alcaligenaceae.id.2875	13	58545246	rs9537886	C	A	-0.057088849	0.011068258	-5.169192126	2.35E-07	16807	24
11260	family.Alcaligenaceae.id.2875	13	58545245	rs9537885	G	A	-0.056639293	0.011068141	-5.12957762	2.90E-07	16807	24
11261	family.Alcaligenaceae.id.2875	13	58535792	rs9537878	G	A	-0.056354653	0.011062928	-5.107001055	3.27E-07	16810	24
11262	family.Alcaligenaceae.id.2875	13	58599245	rs7988877	T	A	-0.057500209	0.011288479	-5.114488311	3.15E-07	16377	23
11263	family.Alcaligenaceae.id.2875	13	58533627	rs7326330	T	C	-0.056177792	0.011063025	-5.091961389	3.54E-07	16810	24
11264	family.Alcaligenaceae.id.2875	13	58696106	rs7324740	A	G	-0.056834535	0.011384804	-5.014264863	5.32E-07	16809	24
11265	family.Alcaligenaceae.id.2875	13	58708500	rs12867878	G	A	-0.056585059	0.011334387	-5.024088719	5.06E-07	16810	24
11266	family.Alcaligenaceae.id.2875	13	58541519	rs9537883	G	T	-0.055917202	0.011064687	-5.066344291	4.06E-07	16810	24
11267	family.Alcaligenaceae.id.2875	13	58595043	rs1581853	G	A	-0.056954327	0.011289227	-5.067698325	4.03E-07	16377	23
11268	family.Alcaligenaceae.id.2875	13	58530277	rs1926544	A	C	-0.055672546	0.011063399	-5.045222943	4.53E-07	16810	24
11269	family.Alcaligenaceae.id.2875	13	58674683	rs1470456	A	G	-0.054853238	0.01107769	-4.970805991	6.67E-07	16810	24
11270	family.Alcaligenaceae.id.2875	13	58669068	rs9537941	A	C	-0.054886312	0.011077766	-4.975288154	6.52E-07	16810	24
11271	family.Alcaligenaceae.id.2875	2	239888758	rs12467854	C	G	0.065731844	0.013311112	4.944587289	7.63E-07	16697	23
11272	family.Alcaligenaceae.id.2875	13	58662782	rs9537940	C	A	-0.054676722	0.011076381	-4.957510313	7.14E-07	16810	24
11273	family.Alcaligenaceae.id.2875	13	58562244	rs9527747	C	G	-0.055086999	0.011068985	-4.992576288	5.96E-07	16810	24
11274	family.Alcaligenaceae.id.2875	13	58591107	rs9537916	G	A	-0.05617657	0.011289273	-4.997103255	5.82E-07	16377	23
11275	family.Alcaligenaceae.id.2875	13	58511363	rs9537872	A	G	-0.054984772	0.011063314	-4.986492136	6.15E-07	16809	24
11276	family.Alcaligenaceae.id.2875	13	58565876	rs1036449	C	T	-0.054902604	0.01107011	-4.975502978	6.51E-07	16808	24
11277	family.Alcaligenaceae.id.2875	13	58693970	rs7322915	A	T	-0.055518585	0.011336195	-4.92452329	8.46E-07	16810	24
11278	family.Alcaligenaceae.id.2875	13	58524895	rs2217928	T	C	-0.054854976	0.011062964	-4.973295521	6.58E-07	16810	24
11279	family.Alcaligenaceae.id.2875	13	58675865	rs9527759	T	C	-0.054227212	0.011077892	-4.91605192	8.83E-07	16810	24
11280	family.Alcaligenaceae.id.2875	4	45642485	rs4033856	T	C	0.081833964	0.016893105	4.886005218	1.03E-06	15623	22
11281	family.Alcaligenaceae.id.2875	13	58692304	rs7333865	C	T	-0.055424396	0.011391853	-4.903027855	9.44E-07	16810	24
11282	family.Alcaligenaceae.id.2875	13	58652225	rs9563573	C	T	-0.054164505	0.011076406	-4.911546572	9.04E-07	16809	24
11283	family.Alcaligenaceae.id.2875	2	239893009	rs11679161	C	T	0.064919215	0.013287413	4.914227966	8.91E-07	16702	23
11284	family.Alcaligenaceae.id.2875	13	58602233	rs9537922	T	C	-0.054677781	0.011064772	-4.959409784	7.07E-07	16810	24
11285	family.Alcaligenaceae.id.2875	13	58602529	rs9569804	G	A	-0.054667389	0.011064773	-4.958685626	7.10E-07	16810	24
11286	family.Alcaligenaceae.id.2875	13	58561539	rs9537900	A	G	-0.054656105	0.011066873	-4.951057119	7.38E-07	16810	24
11287	family.Alcaligenaceae.id.2875	13	58654345	rs1536384	T	C	-0.054137099	0.011077594	-4.903743889	9.40E-07	16810	24
11288	family.Alcaligenaceae.id.2875	13	58568049	rs9537904	G	A	-0.054596285	0.011069129	-4.948909422	7.46E-07	16809	24
11289	family.Alcaligenaceae.id.2875	13	58509432	rs7997285	C	T	-0.054445082	0.011063167	-4.936006524	7.97E-07	16810	24
11290	family.Alcaligenaceae.id.2875	13	58573937	rs7996696	G	A	-0.054479194	0.011070505	-4.936622205	7.95E-07	16809	24
11291	family.Alcaligenaceae.id.2875	13	58600904	rs9537921	A	G	-0.05447435	0.011065429	-4.941646605	7.75E-07	16810	24
11292	family.Alcaligenaceae.id.2875	13	58566675	rs9527748	G	A	-0.054454827	0.0110699	-4.936323936	7.96E-07	16809	24
11293	family.Alcaligenaceae.id.2875	13	58607843	rs1409526	A	G	-0.054472527	0.011065389	-4.940775931	7.78E-07	16810	24
11294	family.Alcaligenaceae.id.2875	13	58523926	rs9563562	T	C	-0.054400446	0.011062354	-4.933550782	8.07E-07	16810	24
11295	family.Alcaligenaceae.id.2875	13	58475833	rs1953283	C	A	-0.054535533	0.011062852	-4.943952541	7.66E-07	16808	24
11296	family.Alcaligenaceae.id.2875	13	58496024	rs9537865	C	T	-0.054392382	0.011062112	-4.927897642	8.31E-07	16809	24
11297	family.Alcaligenaceae.id.2875	13	58600859	rs9563572	C	T	-0.054395391	0.011064996	-4.932836683	8.10E-07	16810	24
11298	family.Alcaligenaceae.id.2875	13	58575268	rs9537908	T	C	-0.054430909	0.011067027	-4.934923863	8.02E-07	16809	24
11299	family.Alcaligenaceae.id.2875	13	58565101	rs1036450	T	A	-0.054324481	0.011069455	-4.924844218	8.44E-07	16809	24
11300	family.Alcaligenaceae.id.2875	13	58497931	rs9569779	A	G	-0.054333514	0.011062042	-4.922869594	8.53E-07	16810	24
11301	family.Alcaligenaceae.id.2875	13	58608409	rs10444649	C	T	-0.054361297	0.011065612	-4.929212105	8.26E-07	16810	24
11302	family.Alcaligenaceae.id.2875	13	58564927	rs1036451	T	C	-0.054316291	0.011069226	-4.923903694	8.48E-07	16809	24
11303	family.Alcaligenaceae.id.2875	20	29836081	rs67737557	G	C	0.073840948	0.015167785	4.88440342	1.04E-06	15876	21
11304	family.Alcaligenaceae.id.2875	13	58600727	rs9563571	T	C	-0.05429664	0.011065884	-4.925868414	8.40E-07	16810	24
11305	family.Alcaligenaceae.id.2875	2	239892208	rs11683769	A	T	0.064366295	0.013295985	4.872449057	1.10E-06	16702	23
11306	family.Alcaligenaceae.id.2875	13	58692858	rs7139988	G	T	-0.054890944	0.011392133	-4.850991884	1.23E-06	16810	24
11307	family.Alcaligenaceae.id.2875	4	75867283	rs17000015	T	A	-0.060925748	0.012536315	-4.868025712	1.13E-06	16377	23
11308	family.Alcaligenaceae.id.2875	13	58573276	rs9537907	T	A	-0.054178206	0.011070173	-4.910834919	9.07E-07	16807	24
11309	family.Alcaligenaceae.id.2875	13	58695024	rs9527764	T	A	-0.054768074	0.011336514	-4.85545612	1.20E-06	16809	24
11310	family.Alcaligenaceae.id.2875	13	58714835	rs9537948	G	A	-0.055714904	0.011415363	-4.897496217	9.71E-07	16377	23
11311	family.Alcaligenaceae.id.2875	13	58693790	rs7323027	G	A	-0.054823198	0.011392362	-4.844844695	1.27E-06	16810	24
11312	family.Alcaligenaceae.id.2875	13	58570772	rs986833	A	G	-0.054116027	0.011068328	-4.905598748	9.31E-07	16809	24
11313	family.Alcaligenaceae.id.2875	13	58578107	rs7988274	A	C	-0.054164261	0.011065936	-4.912611366	8.99E-07	16809	24
11314	family.Alcaligenaceae.id.2875	13	58565945	rs7990795	G	T	-0.054015206	0.011064345	-4.898017072	9.68E-07	16809	24
11315	family.Alcaligenaceae.id.2875	13	58614187	rs7983206	T	C	-0.054000219	0.011065097	-4.895739028	9.79E-07	16808	24
11316	family.Alcaligenaceae.id.2875	13	58576134	rs9569799	A	G	-0.053969947	0.011067757	-4.89403486	9.88E-07	16809	24
11317	family.Alcaligenaceae.id.2875	13	58583168	rs9537913	A	G	-0.053818201	0.011065504	-4.88170442	1.05E-06	16809	24
11318	family.Alcaligenaceae.id.2875	13	58521633	rs980610	A	G	-0.053736159	0.011062338	-4.872745864	1.10E-06	16810	24
11319	family.Alcaligenaceae.id.2875	3	193456274	rs2367850	C	G	0.062910409	0.013171198	4.769557669	1.85E-06	16377	23
11320	family.Alcaligenaceae.id.2875	13	58585753	rs1887128	A	G	-0.05373993	0.01106585	-4.876611521	1.08E-06	16809	24
11321	family.Alcaligenaceae.id.2875	13	58568714	rs7986644	A	G	-0.053806362	0.0110698	-4.878800212	1.07E-06	16809	24
11322	family.Alcaligenaceae.id.2875	13	58577548	rs9537910	A	G	-0.053669794	0.011066627	-4.868613463	1.12E-06	16809	24
11323	family.Alcaligenaceae.id.2875	13	58578536	rs9563570	G	T	-0.053616593	0.011066516	-4.863802012	1.15E-06	16809	24
11324	family.Alcaligenaceae.id.2875	13	58585768	rs1887129	C	T	-0.05351144	0.011066633	-4.856734241	1.19E-06	16809	24
11325	family.Alcaligenaceae.id.2875	13	58599977	rs74692987	G	A	-0.059973745	0.012627892	-4.832134958	1.35E-06	16377	23
11326	family.Alcaligenaceae.id.2875	13	58615246	rs11618348	A	C	-0.053452366	0.011066497	-4.847217183	1.25E-06	16808	24
11327	family.Alcaligenaceae.id.2875	20	29862692	rs56050831	T	C	0.072568405	0.015137036	4.814383355	1.48E-06	15889	21
11328	family.Alcaligenaceae.id.2875	13	58648599	rs9537937	A	T	-0.052929164	0.011070049	-4.798304872	1.60E-06	16810	24
11329	family.Alcaligenaceae.id.2875	3	70588939	rs7638039	C	T	0.060333529	0.012777892	4.692051309	2.70E-06	16791	24
11330	family.Alcaligenaceae.id.2875	13	58637285	rs9537930	A	G	-0.05322542	0.011069887	-4.821518424	1.42E-06	16809	24
11331	family.Alcaligenaceae.id.2875	13	58582796	rs9537912	A	T	-0.053358855	0.011066491	-4.840882476	1.29E-06	16809	24
11332	family.Alcaligenaceae.id.2875	13	58581180	rs9569803	A	G	-0.053229652	0.011066255	-4.829071194	1.37E-06	16809	24
11333	family.Alcaligenaceae.id.2875	13	58648157	rs35781367	A	G	-0.05254477	0.011070661	-4.763425875	1.90E-06	16810	24
11334	family.Alcaligenaceae.id.2875	13	58711142	rs9569823	C	T	-0.054367932	0.01141515	-4.784615283	1.71E-06	16377	23
11335	family.Alcaligenaceae.id.2875	13	58623468	rs1409517	A	G	-0.052550435	0.011067647	-4.758823307	1.95E-06	16808	24
11336	family.Alcaligenaceae.id.2875	13	58626484	rs7318351	A	T	-0.052517558	0.011068134	-4.757182506	1.96E-06	16808	24
11337	family.Alcaligenaceae.id.2875	13	58626247	rs35329616	C	T	-0.05248518	0.011068306	-4.754434667	1.99E-06	16808	24
11338	family.Alcaligenaceae.id.2875	13	58625671	rs1575903	A	G	-0.052463264	0.011067687	-4.752626663	2.01E-06	16808	24
11339	family.Alcaligenaceae.id.2875	4	75864258	rs59349789	A	T	-0.058783882	0.012546358	-4.683313022	2.82E-06	16377	23
11340	family.Alcaligenaceae.id.2875	20	30596130	rs6087811	G	T	-0.092704374	0.020045669	-4.646974946	3.37E-06	15868	21
11341	family.Alcaligenaceae.id.2875	20	29856273	rs7270486	C	A	0.069389393	0.014933702	4.680774406	2.86E-06	15996	22
11342	family.Alcaligenaceae.id.2875	5	173497796	rs62395635	C	T	0.110582886	0.023851434	4.648291244	3.35E-06	14802	20
11343	family.Alcaligenaceae.id.2875	2	239893464	rs7593823	G	A	0.061326557	0.013187821	4.650495538	3.31E-06	16810	24
11344	family.Alcaligenaceae.id.2875	20	29869867	rs113310015	C	T	0.069807718	0.015124335	4.636658511	3.54E-06	15886	21
11345	family.Alcaligenaceae.id.2875	20	29825914	rs368042645	G	A	0.069155801	0.015156239	4.577482854	4.71E-06	15876	21
11346	family.Alcaligenaceae.id.2875	6	138305038	rs112159068	T	A	0.131483982	0.028108868	4.635262793	3.56E-06	11656	14
11347	family.Alcaligenaceae.id.2875	2	239893783	rs35945722	G	A	0.063047827	0.013943093	4.591888533	4.39E-06	16692	23
11348	family.Alcaligenaceae.id.2875	20	29877101	rs67553427	T	A	0.069226288	0.015138938	4.594092044	4.35E-06	15886	21
11349	family.Alcaligenaceae.id.2875	6	138305102	rs72982722	C	T	0.131040727	0.028109563	4.619433499	3.85E-06	11656	14
11350	family.Alcaligenaceae.id.2875	20	30591039	rs78428620	C	T	-0.09325656	0.020513307	-4.559853804	5.12E-06	15869	21
11351	family.Alcaligenaceae.id.2875	3	70592215	rs11128180	G	A	0.058649835	0.013003734	4.518057605	6.24E-06	16810	24
11352	family.Alcaligenaceae.id.2875	2	239865055	rs4511740	A	G	0.058055645	0.012940585	4.490191034	7.12E-06	16809	24
11353	family.Alcaligenaceae.id.2875	20	29831598	rs58598064	G	T	0.068562293	0.015227301	4.536090963	5.73E-06	15876	21
11354	family.Alcaligenaceae.id.2875	7	104214487	rs6969323	C	A	-0.059356404	0.012913653	-4.617398244	3.89E-06	16810	24
11355	family.Alcaligenaceae.id.2875	13	58464209	rs7991472	T	C	-0.050799647	0.011084127	-4.599691776	4.23E-06	16800	24
11356	family.Alcaligenaceae.id.2875	12	1396151	rs7302582	C	G	-0.106816521	0.023298022	-4.648996142	3.34E-06	15113	22
11357	family.Alcaligenaceae.id.2875	20	29826247	rs73119510	C	T	0.068061104	0.015159217	4.50932287	6.50E-06	15876	21
11358	family.Alcaligenaceae.id.2875	13	107906880	rs9520346	G	C	0.147300402	0.033546543	4.584025302	4.56E-06	4725	6
11359	family.Alcaligenaceae.id.2875	13	58465840	rs7330191	C	T	-0.050745241	0.011084406	-4.59457652	4.34E-06	16799	24
11360	family.Alcaligenaceae.id.2875	5	104233461	rs1153990	G	A	-0.058726971	0.012830567	-4.527524534	5.97E-06	16808	24
11361	family.Alcaligenaceae.id.2875	6	138304528	rs77984434	C	A	0.130085126	0.028233064	4.557559081	5.18E-06	11595	13
11362	family.Alcaligenaceae.id.2875	13	58462704	rs9527726	A	G	-0.050458431	0.011130703	-4.559731373	5.12E-06	16810	24
11363	family.Alcaligenaceae.id.2875	2	239906429	rs13385989	A	C	0.062682256	0.013688828	4.571453419	4.84E-06	16377	23
11364	family.Alcaligenaceae.id.2875	20	29873114	rs41293110	G	T	0.068132609	0.015140793	4.5221195	6.12E-06	15886	21
11365	family.Alcaligenaceae.id.2875	20	29870472	rs66514327	A	T	0.067670285	0.015121573	4.506703461	6.58E-06	15886	21
11366	family.Alcaligenaceae.id.2875	20	29874301	rs55995696	T	C	0.068088124	0.015138603	4.518397929	6.23E-06	15886	21
11367	family.Alcaligenaceae.id.2875	14	66593668	.	T	A	-0.056397175	0.012475315	-4.523456871	6.08E-06	16377	23
11368	family.Alcaligenaceae.id.2875	18	26569901	rs9964679	G	A	0.053705118	0.011600815	4.588057899	4.47E-06	16810	24
11370	family.Alcaligenaceae.id.2875	20	30035795	rs8115462	T	C	0.063925094	0.014286304	4.512056181	6.42E-06	15997	22
11371	family.Alcaligenaceae.id.2875	20	29805352	rs73117396	G	A	0.067683178	0.015218434	4.461290055	8.15E-06	15876	21
11372	family.Alcaligenaceae.id.2875	13	58372963	rs6561944	T	C	-0.050313464	0.011166019	-4.527729994	5.96E-06	16810	24
11373	family.Alcaligenaceae.id.2875	20	29811726	rs371834896	C	T	0.067679008	0.015200887	4.462635042	8.10E-06	15876	21
11374	family.Alcaligenaceae.id.2875	13	58546632	rs7317710	T	C	0.049786075	0.010943489	4.53300011	5.82E-06	16810	24
11375	family.Alcaligenaceae.id.2875	5	104231611	rs1217467	C	T	-0.058597508	0.012856147	-4.463723997	8.05E-06	16808	24
11377	family.Alcaligenaceae.id.2875	9	82485327	rs112135816	G	T	-0.077505169	0.017155357	-4.553477833	5.28E-06	15545	22
11381	family.Alcaligenaceae.id.2875	7	111285576	rs1859743	C	T	-0.049182693	0.011082116	-4.479873013	7.47E-06	16702	23
11382	family.Alcaligenaceae.id.2875	7	111294074	rs2040996	C	T	-0.049092245	0.011023144	-4.470623755	7.80E-06	16801	24
11384	family.Alcaligenaceae.id.2875	20	29534074	rs6118993	C	T	0.071083747	0.015885763	4.453819085	8.44E-06	15456	20
11385	family.Alcaligenaceae.id.2875	13	58462914	rs4584714	A	G	-0.049424884	0.011090703	-4.475275835	7.63E-06	16810	24
11386	family.Alcaligenaceae.id.2875	16	85945839	rs147968	T	C	0.048947517	0.011032087	4.436884836	9.13E-06	16810	24
11387	family.Alcaligenaceae.id.2875	13	58372849	rs7331960	A	G	-0.049562701	0.011165361	-4.459794759	8.20E-06	16806	24
11388	family.Alcaligenaceae.id.2875	7	111285025	rs2613606	T	C	-0.048629411	0.011021758	-4.442497899	8.89E-06	16805	24
11389	family.Alcaligenaceae.id.2875	6	138305334	rs148149311	G	A	0.126743235	0.028119873	4.455698463	8.36E-06	11655	14
11391	family.Alcaligenaceae.id.2875	7	104217664	rs28437793	C	G	-0.056928184	0.012646805	-4.503147307	6.70E-06	16805	24
11392	family.Alcaligenaceae.id.2875	6	138304169	rs7768419	A	G	0.126081801	0.028090945	4.443551617	8.85E-06	11659	14
11393	family.Alcaligenaceae.id.2875	13	58394849	rs8000825	G	A	-0.049212184	0.011148006	-4.440178968	8.99E-06	16810	24
11394	family.Alcaligenaceae.id.2875	7	111293616	rs2906622	T	C	-0.048502339	0.011021156	-4.421700251	9.79E-06	16803	24
11395	family.Alcaligenaceae.id.2875	13	58406123	rs6650396	A	G	-0.049177485	0.011146531	-4.437075679	9.12E-06	16808	24
11397	family.Alcaligenaceae.id.2875	13	58382129	rs1344064	C	T	-0.04919682	0.011150479	-4.435627649	9.18E-06	16810	24
11399	family.Alcaligenaceae.id.2875	13	58388024	rs9537819	A	G	-0.049147324	0.011150152	-4.435413946	9.19E-06	16810	24
11402	family.Alcaligenaceae.id.2875	13	58382629	rs9537817	A	C	-0.049170058	0.011150513	-4.432551978	9.31E-06	16810	24
11404	family.Alcaligenaceae.id.2875	13	58375861	rs2320923	G	A	-0.04910061	0.011150279	-4.426962497	9.56E-06	16810	24
11405	family.Alcaligenaceae.id.2875	2	239904554	rs10203027	T	C	0.062295949	0.013907539	4.453101898	8.46E-06	16377	23
11406	family.Alcaligenaceae.id.2875	13	58375865	rs2320924	T	C	-0.04899406	0.011150322	-4.41741381	9.99E-06	16810	24
11418	family.Alcaligenaceae.id.2875	7	104215791	rs4354244	C	T	-0.055898087	0.012652211	-4.41884225	9.92E-06	16810	24
11431	family.Alcaligenaceae.id.2875	11	20763367	rs74776516	G	T	-0.09440518	0.021328653	-4.498281731	6.85E-06	14502	20
11439	family.Alcaligenaceae.id.2875	15	71522509	rs28480294	C	T	-0.051696664	0.011550326	-4.506003551	6.61E-06	16377	23
11445	family.Alcaligenaceae.id.2875	7	104217359	rs67623980	C	T	-0.060502869	0.013480426	-4.441109315	8.95E-06	16806	24
11455	family.Alcaligenaceae.id.2875	4	83635863	rs79846372	G	A	0.088245866	0.019832763	4.494114318	6.99E-06	16186	22
11929	family.Bacteroidaceae.id.917	3	10593224	rs6795673	T	C	0.053856525	0.010525127	5.100974685	3.38E-07	18301	24
11930	family.Bacteroidaceae.id.917	3	10594207	rs6810046	A	G	0.052862812	0.010524643	5.005946319	5.56E-07	18302	24
11931	family.Bacteroidaceae.id.917	3	10595393	rs750423	G	A	0.05198708	0.010538378	4.914768442	8.89E-07	18302	24
11932	family.Bacteroidaceae.id.917	6	29143451	rs28757219	A	T	0.081839827	0.017031866	4.840642393	1.29E-06	14833	20
11933	family.Bacteroidaceae.id.917	13	24910476	rs9507307	T	C	0.060445621	0.012912793	4.740957737	2.13E-06	18184	23
11934	family.Bacteroidaceae.id.917	20	58605432	rs66474973	T	G	0.081251539	0.016447899	4.966714765	6.81E-07	17405	22
11935	family.Bacteroidaceae.id.917	1	10644351	rs11585893	G	A	-0.074074561	0.014763325	-4.775219844	1.80E-06	17821	23
11936	family.Bacteroidaceae.id.917	9	112855426	rs495004	G	C	-0.060747491	0.012986536	-4.643779611	3.42E-06	17707	22
11937	family.Bacteroidaceae.id.917	19	24342250	rs17619981	G	T	0.088097761	0.018700207	4.693413983	2.69E-06	15801	20
11938	family.Bacteroidaceae.id.917	20	58607602	rs195028	A	G	0.079870059	0.016555907	4.834539792	1.33E-06	17404	22
11939	family.Bacteroidaceae.id.917	14	22045949	rs2023437	C	T	-0.07823245	0.016763399	-4.564023942	5.02E-06	17484	23
11940	family.Bacteroidaceae.id.917	13	24912393	rs79471440	G	T	0.05805266	0.012908309	4.55497678	5.24E-06	18182	23
11941	family.Bacteroidaceae.id.917	9	112855172	rs480694	T	A	-0.059185341	0.012989794	-4.520778967	6.16E-06	17707	22
11942	family.Bacteroidaceae.id.917	13	24888712	rs7322219	T	C	0.052363472	0.011611547	4.532323524	5.83E-06	17821	23
11944	family.Bacteroidaceae.id.917	14	22047444	rs68118234	T	C	-0.077133828	0.016786129	-4.539219374	5.65E-06	17484	23
11946	family.Bacteroidaceae.id.917	13	24909900	rs78280928	G	A	0.056726545	0.012934611	4.441027045	8.95E-06	18184	23
11947	family.Bacteroidaceae.id.917	13	24904985	rs79325005	A	G	0.056802978	0.012924181	4.45026003	8.58E-06	18187	23
11949	family.Bacteroidaceae.id.917	3	77215327	rs66710942	T	C	0.048803777	0.010741209	4.531285366	5.86E-06	17821	23
11951	family.Bacteroidaceae.id.917	6	41519430	rs13207588	G	A	-0.059204982	0.013119468	-4.479407749	7.49E-06	17707	22
11952	family.Bacteroidaceae.id.917	3	62019400	rs2366421	A	T	-0.05281527	0.011712437	-4.474767651	7.65E-06	18299	24
11958	family.Bacteroidaceae.id.917	1	102960989	rs1340391	C	T	-0.059200382	0.013224416	-4.502050394	6.73E-06	18302	24
11977	family.Bacteroidaceae.id.917	20	58614853	rs6015624	A	G	0.075321041	0.016619237	4.555986798	5.21E-06	17411	22
11984	family.Bacteroidaceae.id.917	1	102961031	rs1340392	G	A	-0.058210703	0.013194497	-4.42603004	9.60E-06	18302	24
12015	family.Bacteroidaceae.id.917	20	58614443	rs17788984	A	G	0.075306559	0.0169849	4.453053972	8.47E-06	17291	21
12350	family.BacteroidalesS24.7group.id.11173	22	25943322	rs738193	C	T	0.084732776	0.016585588	5.077634559	3.82E-07	7778	23
12351	family.BacteroidalesS24.7group.id.11173	7	90714667	rs941000	T	C	0.085026574	0.016338237	5.113910618	3.16E-07	7778	23
12352	family.BacteroidalesS24.7group.id.11173	7	90714682	rs696266	G	A	0.084172263	0.016349071	5.056480092	4.27E-07	7778	23
12353	family.BacteroidalesS24.7group.id.11173	15	47352866	rs689695	A	C	0.081457787	0.016705675	4.84277449	1.28E-06	7954	24
12354	family.BacteroidalesS24.7group.id.11173	7	90716502	rs697394	A	T	0.08508511	0.016973161	4.934467724	8.04E-07	7952	24
12355	family.BacteroidalesS24.7group.id.11173	2	53044283	rs6742712	T	C	-0.173966846	0.034415268	-4.998166675	5.79E-07	5306	17
12356	family.BacteroidalesS24.7group.id.11173	2	53139362	rs17043785	C	T	-0.176186835	0.034713295	-5.02182162	5.12E-07	5208	15
12357	family.BacteroidalesS24.7group.id.11173	7	90713562	rs696267	T	C	0.083275245	0.016958827	4.822730302	1.42E-06	7954	24
12358	family.BacteroidalesS24.7group.id.11173	15	47331706	rs12438801	A	G	0.082106795	0.017451812	4.710180447	2.47E-06	7950	24
12359	family.BacteroidalesS24.7group.id.11173	7	90737708	rs803053	T	A	0.081155766	0.016959879	4.661903024	3.13E-06	7778	23
12360	family.BacteroidalesS24.7group.id.11173	15	47340971	rs1850003	G	A	0.084048049	0.017780629	4.715997477	2.41E-06	7952	24
12361	family.BacteroidalesS24.7group.id.11173	2	53045620	rs17043468	T	C	-0.172758567	0.034356969	-4.950697342	7.39E-07	5306	17
12362	family.BacteroidalesS24.7group.id.11173	15	47332811	rs17280811	A	C	0.081058356	0.01736062	4.652430673	3.28E-06	7951	24
12363	family.BacteroidalesS24.7group.id.11173	2	53132960	rs17043770	A	G	-0.176885673	0.034409236	-4.95848895	7.10E-07	5208	15
12364	family.BacteroidalesS24.7group.id.11173	15	47350931	rs601978	A	T	0.082620581	0.017707365	4.627148129	3.71E-06	7953	24
12365	family.BacteroidalesS24.7group.id.11173	2	53051798	rs2356673	A	G	-0.17322237	0.03473473	-4.883804041	1.04E-06	5306	17
12366	family.BacteroidalesS24.7group.id.11173	15	47358891	rs690117	G	A	0.08106786	0.01766314	4.581321276	4.62E-06	7948	24
12367	family.BacteroidalesS24.7group.id.11173	15	47338687	rs28494831	C	T	0.079596718	0.017415467	4.576772367	4.72E-06	7950	24
12368	family.BacteroidalesS24.7group.id.11173	15	47345767	rs12148053	T	C	0.07963812	0.017363499	4.564243961	5.01E-06	7950	24
12369	family.BacteroidalesS24.7group.id.11173	6	151515172	rs10872669	G	A	-0.123070536	0.027566518	-4.428476662	9.49E-06	7368	21
12370	family.BacteroidalesS24.7group.id.11173	15	47313244	rs1949158	C	T	0.078775503	0.017373806	4.504826653	6.64E-06	7949	24
12371	family.BacteroidalesS24.7group.id.11173	2	53135357	rs149498972	G	A	-0.172494691	0.034778646	-4.847616782	1.25E-06	5208	15
12372	family.BacteroidalesS24.7group.id.11173	15	47302023	rs28434476	G	C	0.078215538	0.017423941	4.491682183	7.07E-06	7949	24
12373	family.BacteroidalesS24.7group.id.11173	2	53135287	rs138088344	G	A	-0.17158942	0.034767907	-4.834563558	1.33E-06	5208	15
12374	family.BacteroidalesS24.7group.id.11173	1	242767252	rs12748533	T	G	-0.082110804	0.017270056	-4.700898483	2.59E-06	7948	24
12375	family.BacteroidalesS24.7group.id.11173	15	47341901	rs17346776	T	G	0.078700235	0.017360244	4.510305386	6.47E-06	7951	24
12376	family.BacteroidalesS24.7group.id.11173	15	47305716	rs1398206	G	A	0.077729553	0.017426748	4.458829093	8.24E-06	7949	24
12377	family.BacteroidalesS24.7group.id.11173	15	47307610	rs3920216	A	G	0.077702331	0.017424227	4.455957496	8.35E-06	7949	24
12379	family.BacteroidalesS24.7group.id.11173	4	149300138	rs6831034	A	T	-0.095654602	0.020522806	-4.522755847	6.10E-06	7576	23
12380	family.BacteroidalesS24.7group.id.11173	2	53119600	rs72791497	G	T	-0.173114505	0.035309325	-4.714687693	2.42E-06	5208	15
12382	family.BacteroidalesS24.7group.id.11173	15	47339062	rs28545668	G	C	0.077637614	0.017369063	4.448097399	8.66E-06	7950	24
12383	family.BacteroidalesS24.7group.id.11173	3	158662406	rs56733378	C	T	0.120528363	0.027206661	4.419633405	9.89E-06	7577	23
12384	family.BacteroidalesS24.7group.id.11173	15	47339755	rs28410286	A	G	0.077184132	0.01734554	4.421162972	9.82E-06	7950	24
12387	family.BacteroidalesS24.7group.id.11173	7	90729394	rs697400	A	G	0.076156556	0.016593686	4.473380996	7.70E-06	7951	24
12389	family.BacteroidalesS24.7group.id.11173	3	158653545	rs61508842	C	T	0.122574311	0.027238851	4.469839849	7.83E-06	7576	23
12391	family.BacteroidalesS24.7group.id.11173	15	47339690	rs17281048	A	G	0.077079539	0.017366426	4.419764794	9.88E-06	7950	24
12392	family.BacteroidalesS24.7group.id.11173	2	53048622	rs17043487	T	G	-0.162646411	0.034711906	-4.645460747	3.39E-06	5306	17
12396	family.BacteroidalesS24.7group.id.11173	2	53138065	rs965441	C	A	-0.158664446	0.033023628	-4.561006492	5.09E-06	5639	16
12399	family.BacteroidalesS24.7group.id.11173	2	53138341	rs17043777	T	G	-0.157650183	0.032998197	-4.534078334	5.79E-06	5639	16
12401	family.BacteroidalesS24.7group.id.11173	6	63236747	rs78609301	G	A	-0.086706514	0.019570857	-4.490879392	7.09E-06	7953	24
12408	family.BacteroidalesS24.7group.id.11173	5	164763068	rs11135366	G	C	0.084214168	0.01837388	4.445268389	8.78E-06	7953	24
12409	family.BacteroidalesS24.7group.id.11173	5	164763074	rs11135367	T	C	0.083742488	0.018378955	4.421937081	9.78E-06	7952	24
12412	family.BacteroidalesS24.7group.id.11173	2	53138675	rs17043784	C	G	-0.15527361	0.033300666	-4.48547011	7.28E-06	5639	16
12415	family.BacteroidalesS24.7group.id.11173	17	21205200	rs7217209	T	C	0.084301877	0.018730791	4.45397817	8.43E-06	7745	22
12735	family.Bifidobacteriaceae.id.433	2	136616754	rs182549	T	C	0.117069879	0.01267034	9.145381052	5.94E-20	14915	24
12736	family.Bifidobacteriaceae.id.433	2	136608646	rs4988235	A	G	0.116024457	0.012655211	9.060397547	1.30E-19	14915	24
12737	family.Bifidobacteriaceae.id.433	2	136707982	rs6754311	T	C	0.113083769	0.012649858	8.849778855	8.77E-19	14914	24
12738	family.Bifidobacteriaceae.id.433	2	135837906	rs7570971	C	A	0.112507848	0.012517823	8.987390307	2.53E-19	14795	23
12739	family.Bifidobacteriaceae.id.433	2	136407479	rs1446585	A	G	0.111859212	0.012751386	8.657576712	4.82E-18	14795	23
12740	family.Bifidobacteriaceae.id.433	2	136413650	rs36084664	A	G	-0.113351505	0.013505869	-8.793783205	1.45E-18	13923	21
12741	family.Bifidobacteriaceae.id.433	2	136381348	rs12465802	G	A	0.109584916	0.012596568	8.629761944	6.15E-18	14915	24
12742	family.Bifidobacteriaceae.id.433	2	135954797	rs1375131	T	C	0.109578437	0.012503601	8.68050663	3.94E-18	14914	24
12743	family.Bifidobacteriaceae.id.433	2	135907088	rs6730157	A	G	0.109434797	0.012501415	8.673133295	4.20E-18	14915	24
12744	family.Bifidobacteriaceae.id.433	2	136740900	rs687670	T	C	0.111068768	0.012910884	8.468270288	2.49E-17	14915	24
12745	family.Bifidobacteriaceae.id.433	2	136721995	rs13404551	T	C	0.109896101	0.012898168	8.346638288	7.02E-17	14913	24
12746	family.Bifidobacteriaceae.id.433	2	136685228	rs309160	C	T	0.107558118	0.012909833	8.167853894	3.14E-16	14915	24
12747	family.Bifidobacteriaceae.id.433	2	136043944	rs13023281	T	C	-0.106109403	0.013415352	-8.291827421	1.12E-16	13923	21
12748	family.Bifidobacteriaceae.id.433	2	136670298	rs309168	C	T	0.106802161	0.012912664	8.108978067	5.10E-16	14915	24
12749	family.Bifidobacteriaceae.id.433	2	136658345	rs218174	A	G	0.106575507	0.012915676	8.066312035	7.25E-16	14914	24
12750	family.Bifidobacteriaceae.id.433	2	136614255	rs309180	A	G	0.10539799	0.01292542	7.988942984	1.36E-15	14915	24
12751	family.Bifidobacteriaceae.id.433	2	136755684	rs309134	G	A	0.106886391	0.013093137	7.989575476	1.35E-15	14915	24
12752	family.Bifidobacteriaceae.id.433	2	136638216	rs632632	T	C	0.104541167	0.012914516	7.917590309	2.42E-15	14915	24
12753	family.Bifidobacteriaceae.id.433	2	136721603	rs12615624	A	G	0.104912813	0.013094537	7.832485019	4.78E-15	14915	24
12754	family.Bifidobacteriaceae.id.433	2	136643555	rs309125	C	T	0.102808615	0.012917546	7.791206804	6.64E-15	14915	24
12755	family.Bifidobacteriaceae.id.433	2	136322676	rs6759321	G	T	0.101493287	0.012699339	7.854834056	4.00E-15	14795	23
12756	family.Bifidobacteriaceae.id.433	2	136691825	rs309164	T	C	0.102652865	0.013096652	7.66831304	1.74E-14	14915	24
12757	family.Bifidobacteriaceae.id.433	2	136092061	rs1561277	C	A	0.099556776	0.012676731	7.70796092	1.28E-14	14795	23
12758	family.Bifidobacteriaceae.id.433	2	136787402	rs6716536	C	T	0.09776341	0.012713278	7.576205147	3.56E-14	14795	23
12759	family.Bifidobacteriaceae.id.433	2	136622046	rs4988183	T	C	0.101649519	0.013190791	7.528723331	5.12E-14	14915	24
12760	family.Bifidobacteriaceae.id.433	2	136698098	rs309149	C	T	0.100981417	0.013096766	7.548844819	4.39E-14	14915	24
12761	family.Bifidobacteriaceae.id.433	2	136608231	rs4954490	A	G	0.099988928	0.013000606	7.525536669	5.25E-14	14911	24
12762	family.Bifidobacteriaceae.id.433	2	136765951	rs309137	T	C	0.098729233	0.012880528	7.526207339	5.22E-14	14915	24
12763	family.Bifidobacteriaceae.id.433	2	136594158	rs2236783	A	G	0.099014206	0.013023512	7.422240957	1.15E-13	14915	24
12764	family.Bifidobacteriaceae.id.433	2	136820076	rs11681248	T	C	0.093882538	0.01242227	7.446141677	9.61E-14	14910	24
12765	family.Bifidobacteriaceae.id.433	2	136589612	rs12620033	G	C	0.09828099	0.013020535	7.371765735	1.68E-13	14915	24
12766	family.Bifidobacteriaceae.id.433	2	136603276	rs3754686	C	T	0.096944739	0.012999565	7.302809283	2.82E-13	14915	24
12767	family.Bifidobacteriaceae.id.433	2	136603366	rs3769005	G	C	0.095669461	0.012999119	7.217535703	5.29E-13	14915	24
12768	family.Bifidobacteriaceae.id.433	2	136786651	rs12475139	T	A	0.094237699	0.012859641	7.212201531	5.51E-13	14795	23
12769	family.Bifidobacteriaceae.id.433	2	136583192	rs745500	A	G	0.095710515	0.013006705	7.193972318	6.29E-13	14915	24
12770	family.Bifidobacteriaceae.id.433	2	136575199	rs6719488	T	G	0.095570482	0.013006874	7.188912905	6.53E-13	14915	24
12771	family.Bifidobacteriaceae.id.433	2	136576577	rs892715	C	T	0.095221595	0.013007187	7.163125459	7.89E-13	14915	24
12772	family.Bifidobacteriaceae.id.433	2	136569848	rs12988076	A	C	0.095070705	0.013007627	7.147988802	8.81E-13	14915	24
12773	family.Bifidobacteriaceae.id.433	2	136817088	rs749873	T	C	0.090240165	0.012435111	7.148305213	8.79E-13	14915	24
12774	family.Bifidobacteriaceae.id.433	2	136580287	rs2164210	C	T	0.094471443	0.013007407	7.112014445	1.14E-12	14915	24
12775	family.Bifidobacteriaceae.id.433	2	136557319	rs2322660	T	C	0.094718288	0.013003359	7.130852768	9.97E-13	14915	24
12776	family.Bifidobacteriaceae.id.433	2	136596867	rs6742283	G	A	0.094594727	0.013019039	7.113937608	1.13E-12	14913	24
12777	family.Bifidobacteriaceae.id.433	2	136558157	rs748841	T	C	0.094357379	0.01300378	7.098967718	1.26E-12	14915	24
12778	family.Bifidobacteriaceae.id.433	2	136817616	rs2011946	A	C	0.090479356	0.012521363	7.104723146	1.21E-12	14911	24
12779	family.Bifidobacteriaceae.id.433	2	136602491	rs3739020	T	G	0.094669894	0.013294405	6.957649594	3.46E-12	14912	24
12780	family.Bifidobacteriaceae.id.433	2	135911422	rs17261772	T	C	0.094851308	0.013101253	7.07029873	1.55E-12	14795	23
12781	family.Bifidobacteriaceae.id.433	2	136808949	rs11693502	T	C	0.087771478	0.012516097	6.921491174	4.47E-12	14914	24
12782	family.Bifidobacteriaceae.id.433	2	136550109	rs2082729	T	C	0.093101984	0.013252292	6.866253747	6.59E-12	14915	24
12783	family.Bifidobacteriaceae.id.433	2	136554800	rs6430589	C	G	0.092070578	0.013254708	6.820314471	9.08E-12	14914	24
12784	family.Bifidobacteriaceae.id.433	2	136553639	rs1011361	A	G	0.092449726	0.013253174	6.823896674	8.86E-12	14915	24
12785	family.Bifidobacteriaceae.id.433	2	136535410	rs71348715	T	G	0.092488232	0.013249001	6.822565474	8.94E-12	14915	24
12786	family.Bifidobacteriaceae.id.433	2	136439517	rs313519	A	C	0.091840437	0.013198365	6.832737882	8.33E-12	14915	24
12787	family.Bifidobacteriaceae.id.433	2	136502792	rs1438305	G	C	0.092431119	0.013248769	6.818643638	9.19E-12	14915	24
12788	family.Bifidobacteriaceae.id.433	2	136539122	rs11684545	T	G	0.092154326	0.013248144	6.803490657	1.02E-11	14915	24
12789	family.Bifidobacteriaceae.id.433	2	136494186	rs10202489	A	G	0.092145867	0.013225301	6.812903135	9.56E-12	14915	24
12790	family.Bifidobacteriaceae.id.433	2	136455600	rs71348714	A	G	0.091698814	0.013196093	6.813499554	9.53E-12	14915	24
12791	family.Bifidobacteriaceae.id.433	2	136551694	rs12998016	T	C	0.092099855	0.013255208	6.799829488	1.05E-11	14915	24
12792	family.Bifidobacteriaceae.id.433	2	136439090	rs313518	C	T	0.091595691	0.013197813	6.802477914	1.03E-11	14915	24
12793	family.Bifidobacteriaceae.id.433	2	136445869	rs313528	G	A	0.091466804	0.013194807	6.800404342	1.04E-11	14915	24
12794	family.Bifidobacteriaceae.id.433	2	136499166	rs1438307	T	G	0.091886067	0.013243678	6.785514129	1.16E-11	14915	24
12795	family.Bifidobacteriaceae.id.433	2	136544197	rs10928546	T	C	0.091918259	0.013245784	6.783078423	1.18E-11	14915	24
12796	family.Bifidobacteriaceae.id.433	2	136445526	rs313526	C	T	0.091402841	0.013195151	6.794613683	1.09E-11	14915	24
12797	family.Bifidobacteriaceae.id.433	2	136503157	rs1438304	G	A	0.091950665	0.013248341	6.782420053	1.18E-11	14915	24
12798	family.Bifidobacteriaceae.id.433	2	136522941	rs28453840	A	G	0.091786546	0.013237985	6.775289115	1.24E-11	14915	24
12799	family.Bifidobacteriaceae.id.433	2	136581848	rs1470457	A	G	0.091522107	0.013292886	6.726258987	1.74E-11	14915	24
12800	family.Bifidobacteriaceae.id.433	2	136495619	rs10195620	T	A	0.09184667	0.013253798	6.778943445	1.21E-11	14915	24
12801	family.Bifidobacteriaceae.id.433	2	136812931	rs11679933	T	G	0.086660714	0.012524924	6.806252885	1.00E-11	14911	24
12802	family.Bifidobacteriaceae.id.433	2	136470714	rs13412397	A	G	0.091401318	0.013212372	6.765473195	1.33E-11	14915	24
12803	family.Bifidobacteriaceae.id.433	2	136444123	rs313524	C	T	0.090961414	0.013195229	6.764923183	1.33E-11	14915	24
12804	family.Bifidobacteriaceae.id.433	2	136437507	rs313517	A	G	0.090948738	0.013197242	6.760264789	1.38E-11	14915	24
12805	family.Bifidobacteriaceae.id.433	2	136507039	rs12998387	G	A	0.091430739	0.013237261	6.747946814	1.50E-11	14915	24
12806	family.Bifidobacteriaceae.id.433	2	136462441	rs7355359	T	C	0.090833035	0.01319566	6.747857676	1.50E-11	14915	24
12807	family.Bifidobacteriaceae.id.433	2	136511575	rs3213889	G	A	0.091327746	0.013249662	6.731249549	1.68E-11	14915	24
12808	family.Bifidobacteriaceae.id.433	2	136420690	rs4954280	A	G	0.090524808	0.013192725	6.729545283	1.70E-11	14915	24
12809	family.Bifidobacteriaceae.id.433	2	136419961	rs1446584	A	G	0.090444067	0.013192286	6.72540529	1.75E-11	14915	24
12810	family.Bifidobacteriaceae.id.433	2	136422171	rs2034276	A	T	0.090433529	0.013195544	6.723446378	1.77E-11	14915	24
12811	family.Bifidobacteriaceae.id.433	2	136418348	rs6720287	A	G	0.090288224	0.013192474	6.715140301	1.88E-11	14915	24
12812	family.Bifidobacteriaceae.id.433	2	136518103	rs12994270	A	T	0.09087111	0.013239419	6.696820375	2.13E-11	14915	24
12813	family.Bifidobacteriaceae.id.433	2	136522675	rs10173394	T	C	0.090758286	0.013239075	6.691679657	2.21E-11	14915	24
12814	family.Bifidobacteriaceae.id.433	2	136432103	rs313523	G	A	0.090097907	0.013199697	6.700179001	2.08E-11	14915	24
12815	family.Bifidobacteriaceae.id.433	2	136825272	rs932206	T	C	0.081700765	0.012067349	6.715074244	1.88E-11	14795	23
12816	family.Bifidobacteriaceae.id.433	2	136430866	rs313522	T	A	0.09010487	0.013199893	6.699362435	2.09E-11	14915	24
12817	family.Bifidobacteriaceae.id.433	2	136474098	rs11679508	T	A	0.090434766	0.013213416	6.691488603	2.21E-11	14915	24
12818	family.Bifidobacteriaceae.id.433	2	136416941	rs6755383	C	T	0.089920281	0.013194223	6.688635423	2.25E-11	14915	24
12819	family.Bifidobacteriaceae.id.433	2	136416855	rs6715856	T	C	0.089936645	0.013193025	6.688460988	2.26E-11	14915	24
12820	family.Bifidobacteriaceae.id.433	2	136428460	rs656326	A	C	0.089871764	0.013197003	6.68334213	2.34E-11	14915	24
12821	family.Bifidobacteriaceae.id.433	2	136733897	rs7587285	T	C	0.115650593	0.017565609	6.628755248	3.39E-11	14915	24
12822	family.Bifidobacteriaceae.id.433	2	136495300	rs12469709	T	C	0.090288623	0.013256215	6.660861755	2.72E-11	14915	24
12823	family.Bifidobacteriaceae.id.433	2	136555659	rs2322659	C	T	0.088895542	0.013270183	6.572800351	4.94E-11	14915	24
12824	family.Bifidobacteriaceae.id.433	2	136521514	rs10192827	A	G	0.089766068	0.013239613	6.607603289	3.91E-11	14914	24
12825	family.Bifidobacteriaceae.id.433	2	136731066	rs4954551	G	A	0.114841509	0.017588783	6.57097715	5.00E-11	14915	24
12826	family.Bifidobacteriaceae.id.433	2	136410299	rs10928542	G	A	0.08914797	0.013193871	6.630290289	3.35E-11	14915	24
12827	family.Bifidobacteriaceae.id.433	2	136413359	rs7608045	T	C	0.089008852	0.013194799	6.620542703	3.58E-11	14915	24
12828	family.Bifidobacteriaceae.id.433	2	136402117	rs4954276	A	G	0.089161934	0.013193816	6.610702063	3.83E-11	14915	24
12829	family.Bifidobacteriaceae.id.433	2	136743490	rs2278683	A	C	0.114898448	0.017575349	6.559633705	5.39E-11	14914	24
12830	family.Bifidobacteriaceae.id.433	2	136747085	rs11893318	T	C	0.114637122	0.01758751	6.557526598	5.47E-11	14914	24
12831	family.Bifidobacteriaceae.id.433	2	136409073	rs4954279	G	A	0.088667894	0.013193143	6.594741336	4.26E-11	14915	24
12832	family.Bifidobacteriaceae.id.433	2	136403749	rs13413639	C	A	0.088191565	0.013192627	6.549201321	5.78E-11	14915	24
12833	family.Bifidobacteriaceae.id.433	2	136398174	rs12619365	C	T	0.088234754	0.013243809	6.544110672	5.99E-11	14915	24
12834	family.Bifidobacteriaceae.id.433	2	136751849	rs62160860	G	C	0.115661887	0.017815481	6.503184664	7.86E-11	14912	24
12835	family.Bifidobacteriaceae.id.433	2	135775130	rs7581382	T	C	-0.090211798	0.01478989	-6.570874875	5.00E-11	13923	21
12836	family.Bifidobacteriaceae.id.433	2	135877562	rs1869829	A	G	0.086457176	0.013094197	6.523475256	6.87E-11	14915	24
12837	family.Bifidobacteriaceae.id.433	2	135771974	rs10187402	C	G	0.085848804	0.013138968	6.474062822	9.54E-11	14910	24
12838	family.Bifidobacteriaceae.id.433	2	136873549	rs2680880	T	A	0.080321257	0.012069592	6.469091258	9.86E-11	14915	24
12839	family.Bifidobacteriaceae.id.433	2	135705558	rs1979033	G	A	0.075126082	0.011964979	6.459146888	1.05E-10	14911	24
12840	family.Bifidobacteriaceae.id.433	2	135954405	rs1375132	A	G	0.085217811	0.013106774	6.406715385	1.49E-10	14913	24
12841	family.Bifidobacteriaceae.id.433	2	135832131	rs12328663	T	C	0.103102183	0.016524671	6.440580849	1.19E-10	14915	24
12842	family.Bifidobacteriaceae.id.433	2	136022798	rs935613	C	T	0.084063453	0.013129987	6.319327856	2.63E-10	14915	24
12843	family.Bifidobacteriaceae.id.433	2	135773446	rs4346445	A	C	0.101622616	0.016594483	6.339549174	2.30E-10	14914	24
12844	family.Bifidobacteriaceae.id.433	2	135829432	rs10193348	A	G	0.102560182	0.016529013	6.38605856	1.70E-10	14915	24
12845	family.Bifidobacteriaceae.id.433	2	136421323	rs1374329	A	G	0.084914231	0.013441643	6.20204902	5.57E-10	14915	24
12846	family.Bifidobacteriaceae.id.433	2	135818907	rs2874739	C	T	0.102638949	0.016521275	6.385636495	1.71E-10	14915	24
12847	family.Bifidobacteriaceae.id.433	2	136058820	rs2016636	G	A	0.083821573	0.013132287	6.287307441	3.23E-10	14915	24
12848	family.Bifidobacteriaceae.id.433	2	135849613	rs7568525	G	A	0.101617501	0.016571298	6.353053849	2.11E-10	14915	24
12849	family.Bifidobacteriaceae.id.433	2	135853807	rs10208624	C	T	0.101426811	0.016567347	6.34264663	2.26E-10	14915	24
12850	family.Bifidobacteriaceae.id.433	2	136501840	rs10928545	G	A	0.08557294	0.01359063	6.140737392	8.21E-10	14915	24
12851	family.Bifidobacteriaceae.id.433	2	135796410	rs13389481	C	A	0.103565111	0.016908066	6.283684279	3.31E-10	14914	24
12852	family.Bifidobacteriaceae.id.433	2	135774681	rs11903663	A	G	0.099207438	0.016551555	6.26769523	3.66E-10	14914	24
12853	family.Bifidobacteriaceae.id.433	2	135766072	rs4953945	C	G	0.103435676	0.016670922	6.303199531	2.92E-10	14914	24
12854	family.Bifidobacteriaceae.id.433	2	136522710	rs9287442	G	A	0.084875619	0.013582192	6.101157182	1.05E-09	14915	24
12855	family.Bifidobacteriaceae.id.433	2	136720344	rs3768998	G	T	0.108666774	0.018119307	6.02313039	1.71E-09	14914	24
12856	family.Bifidobacteriaceae.id.433	2	136528004	rs2304599	G	C	0.08506172	0.013645962	6.09133332	1.12E-09	14915	24
12857	family.Bifidobacteriaceae.id.433	2	135871624	rs58697996	G	A	0.101221307	0.016576443	6.293959776	3.09E-10	14915	24
12858	family.Bifidobacteriaceae.id.433	2	135773617	rs4640444	T	C	0.098873509	0.016553136	6.239595082	4.39E-10	14914	24
12859	family.Bifidobacteriaceae.id.433	2	135799082	rs62168942	T	C	0.101509267	0.016589206	6.268165078	3.65E-10	14915	24
12860	family.Bifidobacteriaceae.id.433	2	135801228	rs4954217	C	T	0.101490868	0.016587766	6.267034897	3.68E-10	14915	24
12861	family.Bifidobacteriaceae.id.433	2	136783169	rs6714750	A	G	0.083669539	0.013236441	6.183192573	6.28E-10	14795	23
12862	family.Bifidobacteriaceae.id.433	2	136544752	rs6760329	G	A	0.084632213	0.013639608	6.079063235	1.21E-09	14915	24
12863	family.Bifidobacteriaceae.id.433	2	135861497	rs7573600	G	C	0.100477531	0.016533233	6.274481209	3.51E-10	14915	24
12864	family.Bifidobacteriaceae.id.433	2	135773692	rs4645053	T	A	0.098665085	0.016553446	6.226343664	4.77E-10	14914	24
12865	family.Bifidobacteriaceae.id.433	2	135795443	rs10167901	C	T	0.101243242	0.016592894	6.255442532	3.96E-10	14915	24
12866	family.Bifidobacteriaceae.id.433	2	135795095	rs4954216	G	A	0.101236482	0.016591441	6.254915177	3.98E-10	14915	24
12867	family.Bifidobacteriaceae.id.433	2	135795150	rs4953948	T	G	0.101175723	0.016591329	6.25452529	3.99E-10	14915	24
12868	family.Bifidobacteriaceae.id.433	2	135795385	rs10167809	C	T	0.101128482	0.016591243	6.251063574	4.08E-10	14915	24
12869	family.Bifidobacteriaceae.id.433	2	135795396	rs10167884	C	T	0.101135586	0.016592756	6.251063574	4.08E-10	14915	24
12870	family.Bifidobacteriaceae.id.433	2	135874038	rs61087958	C	T	0.100543659	0.016541884	6.267663463	3.67E-10	14915	24
12871	family.Bifidobacteriaceae.id.433	2	136516748	rs12616520	T	A	0.084353424	0.013582429	6.062553851	1.34E-09	14915	24
12872	family.Bifidobacteriaceae.id.433	2	136539513	rs10188066	A	G	0.084432052	0.013639884	6.061913041	1.35E-09	14915	24
12873	family.Bifidobacteriaceae.id.433	2	135800757	rs921859	A	G	0.101045215	0.016587921	6.239800255	4.38E-10	14915	24
12874	family.Bifidobacteriaceae.id.433	2	135872646	rs4954220	C	A	0.100270623	0.016569245	6.263939939	3.75E-10	14915	24
12875	family.Bifidobacteriaceae.id.433	2	136628380	rs4954513	G	A	0.111667727	0.018194426	6.044824594	1.50E-09	14915	24
12876	family.Bifidobacteriaceae.id.433	2	135794986	rs4954215	G	A	0.101034085	0.016592746	6.244104736	4.26E-10	14915	24
12877	family.Bifidobacteriaceae.id.433	2	135802050	rs7601696	C	A	0.101021409	0.01658513	6.234843656	4.52E-10	14915	24
12878	family.Bifidobacteriaceae.id.433	2	135814716	rs7422031	C	T	0.100678096	0.016521202	6.262014179	3.80E-10	14915	24
12879	family.Bifidobacteriaceae.id.433	2	135802148	rs7577258	G	A	0.100962467	0.016583649	6.23191961	4.61E-10	14915	24
12880	family.Bifidobacteriaceae.id.433	2	135812969	rs56903548	C	T	0.100338199	0.016523155	6.243218694	4.29E-10	14915	24
12881	family.Bifidobacteriaceae.id.433	2	135798758	rs62168941	C	T	0.10094025	0.016589789	6.230772347	4.64E-10	14915	24
12882	family.Bifidobacteriaceae.id.433	2	135795040	rs4953947	A	C	0.10089171	0.016594593	6.2348237	4.52E-10	14915	24
12883	family.Bifidobacteriaceae.id.433	2	135800601	rs2017831	C	T	0.100844306	0.016588066	6.2254476	4.80E-10	14915	24
12884	family.Bifidobacteriaceae.id.433	2	135798082	rs13409400	A	C	0.100794864	0.016589263	6.221202334	4.93E-10	14915	24
12885	family.Bifidobacteriaceae.id.433	2	135802028	rs7565268	T	C	0.100778737	0.016585178	6.218585793	5.02E-10	14915	24
12886	family.Bifidobacteriaceae.id.433	2	135755629	rs1530559	A	G	0.073829493	0.01197211	6.211976543	5.23E-10	14795	23
12887	family.Bifidobacteriaceae.id.433	2	135859923	rs11898045	T	C	0.099739912	0.016536459	6.242098211	4.32E-10	14915	24
12888	family.Bifidobacteriaceae.id.433	2	135860305	rs58426504	T	G	0.099689731	0.016534892	6.240147666	4.37E-10	14915	24
12889	family.Bifidobacteriaceae.id.433	2	135795595	rs10182750	T	C	0.100722069	0.016594775	6.219517298	4.99E-10	14915	24
12890	family.Bifidobacteriaceae.id.433	2	135874622	rs6741481	A	G	0.09988937	0.016532884	6.236995605	4.46E-10	14915	24
[truncated: 12,589 more rows]
