# Supplementary material for: The Effects of Specific Gut Microbiota and Metabolites on IgA Nephropathy—Based on Mendelian Randomization and Clinical Validation
Source: Nutrients. 2023 May 22;15(10):2407. doi: 10.3390/nu15102407 (PMC10221929; doi:10.3390/nu15102407)
Supplement: Supplementary file 1 [file nutrients-15-02407-s001.zip › Supplement Table S2.csv]

Supplement Table S2. The instrumental variables of the metabolites (p <5*10-5)
Exposure	SNP	effect_allele	other_allele	beta	se	pval	samplesize
tyrosine	rs411604	G	A	0.204	0.036	1.02E-08	2076
tyrosine	rs214267	G	C	0.218	0.045	9.89E-07	2076
tyrosine	rs9517725	C	T	-0.277	0.057	1.22E-06	2076
tyrosine	rs1865874	T	C	-0.179	0.038	2.14E-06	2076
tyrosine	rs9931034	G	A	2.38	0.513	3.46E-06	2076
tyrosine	rs10420817	T	C	-0.22	0.049	6.57E-06	2076
tyrosine	rs11598789	T	G	-0.358	0.08	7.66E-06	2076
tyrosine	rs943427	T	G	0.553	0.124	8.37E-06	2076
tyrosine	rs904525	T	C	-0.154	0.035	9.27E-06	2076
tyrosine	rs13125515	T	G	0.229	0.052	1.13E-05	2076
tyrosine	rs10100603	G	A	0.227	0.052	1.36E-05	2076
tyrosine	rs17153579	T	A	-0.6	0.138	1.37E-05	2076
tyrosine	rs1879655	T	G	-0.151	0.035	1.48E-05	2076
tyrosine	rs2343144	A	T	-0.214	0.05	1.63E-05	2076
tyrosine	rs10010987	A	G	0.168	0.039	1.77E-05	2076
tyrosine	rs10969294	A	G	0.384	0.09	1.78E-05	2076
tyrosine	rs13147561	G	A	-0.331	0.077	1.85E-05	2076
tyrosine	rs9622979	G	A	0.795	0.187	2.03E-05	2076
tyrosine	rs4611259	A	C	0.285	0.067	2.24E-05	2076
tyrosine	rs2834117	G	A	-0.209	0.049	2.28E-05	2076
tyrosine	rs9524855	A	G	-0.173	0.041	2.39E-05	2076
tyrosine	rs4469676	A	G	-0.141	0.034	2.42E-05	2076
tyrosine	rs1945690	G	A	0.143	0.034	2.59E-05	2076
tyrosine	rs12695959	C	A	0.169	0.04	2.73E-05	2076
tyrosine	rs13253322	G	A	0.149	0.036	2.76E-05	2076
tyrosine	rs775119	G	A	0.145	0.035	2.82E-05	2076
tyrosine	rs10005099	C	A	0.207	0.05	3.07E-05	2076
tyrosine	rs17662854	C	G	-0.478	0.115	3.09E-05	2076
tyrosine	rs1180105	C	A	0.183	0.044	3.22E-05	2076
tyrosine	rs7132173	T	G	-0.144	0.035	3.95E-05	2076
tyrosine	rs11083866	G	A	-0.167	0.041	4.05E-05	2076
tyrosine	rs17054357	C	A	0.172	0.042	4.30E-05	2076
tyrosine	rs2190443	A	G	-0.25	0.061	4.44E-05	2076
tyrosine	rs2616459	T	G	-0.163	0.04	4.61E-05	2076
tyrosine	rs4788815	T	A	0.149	0.037	4.71E-05	2076
tyrosine	rs7146996	C	T	-0.156	0.038	4.84E-05	2076
tyrosine	rs12524344	A	G	-0.4	0.098	4.85E-05	2076
tyrosine	rs17458804	G	C	-0.21	0.052	4.87E-05	2076
tryptophan	rs174574	C	A	0.168	0.036	2.56E-06	2076
tryptophan	rs12601874	C	T	0.192	0.042	4.99E-06	2076
tryptophan	rs12324479	G	A	0.171	0.038	6.11E-06	2076
tryptophan	rs2585349	A	T	-0.316	0.071	8.43E-06	2076
tryptophan	rs2581556	T	A	0.282	0.064	1.04E-05	2076
tryptophan	rs17058746	C	T	0.224	0.052	1.46E-05	2076
tryptophan	rs9840469	C	T	-0.149	0.035	1.80E-05	2076
tryptophan	rs16949637	G	A	0.461	0.108	1.89E-05	2076
tryptophan	rs4417927	T	G	-0.147	0.035	2.55E-05	2076
tryptophan	rs6828521	A	G	0.239	0.057	2.75E-05	2076
tryptophan	rs7783134	T	A	0.17	0.04	2.78E-05	2076
tryptophan	rs10746643	G	A	0.225	0.054	3.10E-05	2076
tryptophan	rs2905309	T	C	-0.156	0.038	3.34E-05	2076
tryptophan	rs193585	G	A	0.489	0.118	3.38E-05	2076
tryptophan	rs16831527	C	T	1.42	0.343	3.48E-05	2076
tryptophan	rs4798721	C	T	-0.162	0.039	3.48E-05	2076
tryptophan	rs12753039	C	T	-0.229	0.055	3.61E-05	2076
tryptophan	rs6596699	C	T	-0.249	0.06	3.68E-05	2076
tryptophan	rs2441756	G	A	-0.147	0.036	3.77E-05	2076
tryptophan	rs1123080	T	C	-0.194	0.047	3.78E-05	2076
tryptophan	rs12135013	T	G	0.204	0.05	3.90E-05	2076
tryptophan	rs1538178	T	C	-0.138	0.033	3.95E-05	2076
tryptophan	rs7106523	T	A	-0.65	0.158	3.99E-05	2076
tryptophan	rs4672791	G	A	0.142	0.035	4.04E-05	2076
tryptophan	rs948221	C	T	0.179	0.044	4.18E-05	2076
tryptophan	rs17320372	C	T	-0.16	0.039	4.32E-05	2076
tryptophan	rs12598188	A	C	-0.294	0.072	4.51E-05	2076
tryptophan	rs2208087	A	G	0.146	0.036	4.61E-05	2076
tryptophan	rs7806810	C	G	-0.14	0.035	4.82E-05	2076
tryptophan	rs12055109	C	T	0.206	0.051	4.93E-05	2076
trimethylamine_N_oxide	rs2703228	C	G	-0.217	0.041	1.28E-07	2076
trimethylamine_N_oxide	rs3935570	G	T	-0.227	0.043	1.56E-07	2076
trimethylamine_N_oxide	rs692588	A	G	2.794	0.577	1.27E-06	2076
trimethylamine_N_oxide	rs13236413	C	T	0.408	0.086	2.23E-06	2076
trimethylamine_N_oxide	rs12221306	A	T	-0.158	0.035	5.04E-06	2076
trimethylamine_N_oxide	rs4846884	C	A	-0.211	0.047	6.19E-06	2076
trimethylamine_N_oxide	rs7302178	A	G	0.237	0.053	6.40E-06	2076
trimethylamine_N_oxide	rs16917161	T	A	0.262	0.059	9.23E-06	2076
trimethylamine_N_oxide	rs2721876	A	G	0.165	0.037	1.01E-05	2076
trimethylamine_N_oxide	rs1446554	A	G	-0.208	0.047	1.05E-05	2076
trimethylamine_N_oxide	rs17131718	C	T	-0.259	0.059	1.22E-05	2076
trimethylamine_N_oxide	rs550915	A	C	0.27	0.062	1.33E-05	2076
trimethylamine_N_oxide	rs4811626	C	T	0.154	0.035	1.49E-05	2076
trimethylamine_N_oxide	rs422576	G	A	0.308	0.071	1.55E-05	2076
trimethylamine_N_oxide	rs8016345	T	A	0.188	0.044	1.62E-05	2076
trimethylamine_N_oxide	rs11098315	C	T	0.189	0.044	1.65E-05	2076
trimethylamine_N_oxide	rs7018973	C	T	0.348	0.081	1.74E-05	2076
trimethylamine_N_oxide	rs7298875	C	T	0.25	0.058	1.78E-05	2076
trimethylamine_N_oxide	rs12379588	T	C	-0.934	0.218	1.83E-05	2076
trimethylamine_N_oxide	rs11625777	T	C	-0.17	0.04	1.88E-05	2076
trimethylamine_N_oxide	rs13212146	C	G	-0.587	0.137	1.91E-05	2076
trimethylamine_N_oxide	rs17045040	G	A	-0.281	0.066	2.00E-05	2076
trimethylamine_N_oxide	rs390258	A	G	0.186	0.044	2.09E-05	2076
trimethylamine_N_oxide	rs7944382	C	A	0.199	0.047	2.41E-05	2076
trimethylamine_N_oxide	rs7953354	T	C	0.243	0.058	2.54E-05	2076
trimethylamine_N_oxide	rs528224	A	T	-0.259	0.062	2.60E-05	2076
trimethylamine_N_oxide	rs9409657	C	T	-0.303	0.073	2.96E-05	2076
trimethylamine_N_oxide	rs4685442	A	G	0.21	0.05	3.02E-05	2076
trimethylamine_N_oxide	rs1737681	T	C	-0.137	0.033	3.22E-05	2076
trimethylamine_N_oxide	rs1337398	G	C	-0.298	0.072	3.24E-05	2076
trimethylamine_N_oxide	rs6035892	A	C	0.205	0.049	3.30E-05	2076
trimethylamine_N_oxide	rs7243722	A	T	0.327	0.079	3.31E-05	2076
trimethylamine_N_oxide	rs12131532	A	T	0.289	0.07	3.36E-05	2076
trimethylamine_N_oxide	rs3799563	C	T	0.145	0.035	3.40E-05	2076
trimethylamine_N_oxide	rs6077980	C	A	0.141	0.034	3.45E-05	2076
trimethylamine_N_oxide	rs2243972	G	C	0.49	0.118	3.50E-05	2076
trimethylamine_N_oxide	rs8110533	G	T	-0.542	0.131	3.65E-05	2076
trimethylamine_N_oxide	rs12116428	C	T	-0.484	0.117	3.73E-05	2076
trimethylamine_N_oxide	rs17811040	G	A	-0.154	0.037	3.77E-05	2076
trimethylamine_N_oxide	rs10104412	A	T	0.206	0.05	3.83E-05	2076
trimethylamine_N_oxide	rs8090864	A	G	-0.562	0.136	3.83E-05	2076
trimethylamine_N_oxide	rs11583422	G	C	0.537	0.13	3.88E-05	2076
trimethylamine_N_oxide	rs13097605	C	T	0.154	0.038	3.95E-05	2076
trimethylamine_N_oxide	rs10873474	G	A	0.238	0.058	4.02E-05	2076
trimethylamine_N_oxide	rs10003933	A	T	-0.211	0.051	4.02E-05	2076
trimethylamine_N_oxide	rs12443031	C	T	3.036	0.74	4.05E-05	2076
trimethylamine_N_oxide	rs7522157	C	T	0.151	0.037	4.11E-05	2076
trimethylamine_N_oxide	rs17526983	G	A	0.467	0.114	4.14E-05	2076
trimethylamine_N_oxide	rs2001146	T	C	0.3	0.073	4.16E-05	2076
trimethylamine_N_oxide	rs4324493	A	G	-0.147	0.036	4.19E-05	2076
trimethylamine_N_oxide	rs6974263	A	C	-0.139	0.034	4.27E-05	2076
trimethylamine_N_oxide	rs1538291	C	T	0.183	0.045	4.27E-05	2076
trimethylamine_N_oxide	rs6656519	T	G	0.182	0.044	4.36E-05	2076
trimethylamine_N_oxide	rs2415847	G	A	-0.168	0.041	4.83E-05	2076
trimethylamine_N_oxide	rs10870302	G	T	-0.14	0.035	4.96E-05	2076
trimethylamine_N_oxide	rs10877835	C	A	-0.225	0.056	4.96E-05	2076
serotonin	rs11204524	G	C	0.299	0.059	3.43E-07	2076
serotonin	rs10761071	T	A	0.21	0.044	1.97E-06	2076
serotonin	rs2862078	C	T	-0.164	0.036	4.31E-06	2076
serotonin	rs17745202	G	A	0.222	0.048	4.39E-06	2076
serotonin	rs16848753	A	G	-0.213	0.047	6.08E-06	2076
serotonin	rs2014998	G	A	-0.173	0.039	8.73E-06	2076
serotonin	rs11715386	C	T	-0.241	0.054	8.96E-06	2076
serotonin	rs6908341	A	G	-0.253	0.057	8.96E-06	2076
serotonin	rs17824783	T	A	-0.22	0.05	1.06E-05	2076
serotonin	rs1605886	G	A	0.234	0.053	1.11E-05	2076
serotonin	rs10766583	G	C	0.156	0.036	1.15E-05	2076
serotonin	rs9425892	T	C	1.002	0.23	1.29E-05	2076
serotonin	rs11190930	T	C	0.36	0.083	1.31E-05	2076
serotonin	rs11588405	T	C	-0.533	0.122	1.35E-05	2076
serotonin	rs9574944	T	A	0.205	0.047	1.42E-05	2076
serotonin	rs6506807	A	C	-0.493	0.114	1.48E-05	2076
serotonin	rs7042406	A	T	0.175	0.04	1.49E-05	2076
serotonin	rs17199220	G	A	-0.354	0.083	2.08E-05	2076
serotonin	rs2112917	C	T	0.183	0.043	2.08E-05	2076
serotonin	rs11891674	C	T	0.411	0.097	2.19E-05	2076
serotonin	rs6133154	T	A	2.019	0.477	2.34E-05	2076
serotonin	rs4565953	G	A	0.485	0.115	2.41E-05	2076
serotonin	rs6862721	G	A	-0.207	0.049	2.54E-05	2076
serotonin	rs12119046	T	G	-0.144	0.034	2.58E-05	2076
serotonin	rs10839219	G	A	-0.156	0.037	2.87E-05	2076
serotonin	rs6956444	A	G	-0.384	0.092	2.98E-05	2076
serotonin	rs480789	C	T	0.19	0.046	3.09E-05	2076
serotonin	rs2869496	A	T	0.141	0.034	3.40E-05	2076
serotonin	rs729341	G	T	-0.256	0.062	3.51E-05	2076
serotonin	rs17679280	G	C	-0.163	0.04	3.66E-05	2076
serotonin	rs4075894	T	G	-0.257	0.062	3.77E-05	2076
serotonin	rs10004639	G	T	-0.171	0.042	3.90E-05	2076
serotonin	rs6782115	A	G	-0.142	0.035	3.97E-05	2076
serotonin	rs2795903	G	T	0.314	0.077	4.06E-05	2076
serotonin	rs6983189	G	A	0.152	0.037	4.31E-05	2076
serotonin	rs12830228	T	C	0.239	0.059	4.45E-05	2076
serotonin	rs1827493	A	C	0.141	0.035	4.58E-05	2076
serotonin	rs17724885	A	G	-0.266	0.065	4.59E-05	2076
serotonin	rs12880863	C	A	0.343	0.084	4.63E-05	2076
serotonin	rs11208797	T	C	-0.147	0.036	4.72E-05	2076
serotonin	rs6552930	G	A	0.232	0.057	4.77E-05	2076
serotonin	rs2277276	A	G	-1.608	0.396	4.85E-05	2076
serotonin	rs17395155	C	T	-0.169	0.042	4.98E-05	2076
serotonin	rs2720107	T	C	-0.243	0.06	4.99E-05	2076
propionic acid	rs11132322	C	T	-0.209	0.043	1.22E-06	2076
propionic acid	rs17479559	A	G	1.176	0.259	5.74E-06	2076
propionic acid	rs6766313	C	T	1.415	0.316	7.56E-06	2076
propionic acid	rs13438383	C	T	0.441	0.1	1.07E-05	2076
propionic acid	rs9474270	G	A	-0.233	0.054	1.35E-05	2076
propionic acid	rs11050033	G	T	0.17	0.04	1.93E-05	2076
propionic acid	rs2270870	G	A	-0.184	0.043	2.19E-05	2076
propionic acid	rs11869187	G	C	-0.173	0.041	2.42E-05	2076
propionic acid	rs4821092	T	C	0.336	0.08	2.57E-05	2076
propionic acid	rs17564192	G	A	0.366	0.087	2.68E-05	2076
propionic acid	rs11648297	C	T	0.315	0.075	2.80E-05	2076
propionic acid	rs11872870	C	T	-0.198	0.047	2.96E-05	2076
propionic acid	rs4078382	G	C	-0.182	0.044	3.04E-05	2076
propionic acid	rs2289746	C	T	0.174	0.042	3.05E-05	2076
propionic acid	rs1157673	G	T	-0.176	0.042	3.14E-05	2076
propionic acid	rs2197742	C	A	-0.206	0.05	3.65E-05	2076
propionic acid	rs96358	G	A	0.169	0.041	3.81E-05	2076
propionic acid	rs11758431	G	A	0.756	0.184	3.82E-05	2076
propionic acid	rs9494311	T	C	0.185	0.045	3.87E-05	2076
propionic acid	rs6482706	A	G	-0.947	0.231	4.20E-05	2076
propionic acid	rs1159957	C	T	-0.341	0.083	4.46E-05	2076
propionic acid	rs739513	C	T	-0.257	0.063	4.47E-05	2076
propionic acid	rs5017592	G	A	0.237	0.058	4.57E-05	2076
propionic acid	rs7936879	A	G	-0.225	0.055	4.63E-05	2076
phenylalanine	rs638284	A	G	-1.162	0.213	4.58E-08	2076
phenylalanine	rs2039970	T	C	-0.19	0.038	4.72E-07	2076
phenylalanine	rs348688	A	C	-0.18	0.036	5.02E-07	2076
phenylalanine	rs12743504	G	A	-0.439	0.091	1.52E-06	2076
phenylalanine	rs11591584	G	A	-0.166	0.035	1.65E-06	2076
phenylalanine	rs4841005	A	G	0.165	0.035	2.26E-06	2076
phenylalanine	rs9822723	A	G	-0.3	0.065	3.64E-06	2076
phenylalanine	rs7047189	G	C	0.186	0.041	5.93E-06	2076
phenylalanine	rs12280639	C	A	-0.252	0.058	1.19E-05	2076
phenylalanine	rs1596144	G	A	0.295	0.068	1.41E-05	2076
phenylalanine	rs7150029	T	C	-0.181	0.042	1.59E-05	2076
phenylalanine	rs6941107	G	A	-0.595	0.138	1.67E-05	2076
phenylalanine	rs4896970	A	G	2.336	0.544	1.75E-05	2076
phenylalanine	rs1133847	T	C	0.151	0.035	1.77E-05	2076
phenylalanine	rs7418357	G	A	-0.159	0.038	2.32E-05	2076
phenylalanine	rs10012165	T	C	-0.233	0.055	2.36E-05	2076
phenylalanine	rs719596	T	C	-0.546	0.129	2.39E-05	2076
phenylalanine	rs1953462	G	A	-0.167	0.039	2.43E-05	2076
phenylalanine	rs687088	C	T	-0.172	0.041	2.47E-05	2076
phenylalanine	rs10188503	C	A	0.169	0.04	2.55E-05	2076
phenylalanine	rs11016033	A	T	0.18	0.043	2.69E-05	2076
phenylalanine	rs1865874	T	C	-0.158	0.038	2.89E-05	2076
phenylalanine	rs6755207	C	T	-0.354	0.085	2.93E-05	2076
phenylalanine	rs772657	A	T	0.187	0.045	2.96E-05	2076
phenylalanine	rs13278634	T	C	0.211	0.051	3.15E-05	2076
phenylalanine	rs1874853	A	G	-0.156	0.038	3.30E-05	2076
phenylalanine	rs2043450	G	A	0.223	0.054	3.55E-05	2076
phenylalanine	rs9471643	G	C	-0.171	0.041	3.66E-05	2076
phenylalanine	rs10066318	A	G	-0.315	0.076	3.74E-05	2076
phenylalanine	rs17106132	C	T	0.342	0.083	3.87E-05	2076
phenylalanine	rs11109097	T	C	-0.156	0.038	3.89E-05	2076
phenylalanine	rs10222597	C	T	0.242	0.059	4.08E-05	2076
phenylalanine	rs6481877	C	G	0.216	0.053	4.09E-05	2076
phenylalanine	rs2196038	G	A	-0.25	0.061	4.14E-05	2076
phenylalanine	rs11159592	C	A	-0.153	0.037	4.36E-05	2076
phenylalanine	rs206500	T	C	-0.265	0.065	4.36E-05	2076
phenylalanine	rs2002559	A	T	-0.624	0.153	4.53E-05	2076
phenylalanine	rs12026938	G	A	0.289	0.071	4.75E-05	2076
phenylalanine	rs381312	G	C	-0.176	0.043	4.99E-05	2076
kynurenin	rs893468	C	T	-0.3	0.053	2.05E-08	2076
kynurenin	rs12931876	T	C	0.23	0.048	1.70E-06	2076
kynurenin	rs7333033	C	A	0.18	0.038	2.21E-06	2076
kynurenin	rs9373952	T	C	0.187	0.04	3.92E-06	2076
kynurenin	rs17696621	T	C	-0.198	0.043	4.59E-06	2076
kynurenin	rs1535135	C	T	-0.212	0.047	5.92E-06	2076
kynurenin	rs276125	T	C	-0.17	0.038	5.93E-06	2076
kynurenin	rs16854526	T	G	-0.244	0.054	6.50E-06	2076
kynurenin	rs17145367	A	G	0.402	0.09	7.37E-06	2076
kynurenin	rs2095108	C	T	-0.189	0.043	8.40E-06	2076
kynurenin	rs11701784	A	G	1.429	0.322	9.35E-06	2076
kynurenin	rs1689872	G	C	-0.171	0.039	9.88E-06	2076
kynurenin	rs7249829	A	G	-0.168	0.038	9.98E-06	2076
kynurenin	rs1534399	A	G	-0.211	0.048	1.05E-05	2076
kynurenin	rs6571396	G	T	-0.165	0.037	1.07E-05	2076
kynurenin	rs12906090	A	G	0.496	0.113	1.23E-05	2076
kynurenin	rs13399896	A	G	0.288	0.067	1.61E-05	2076
kynurenin	rs10043050	A	G	0.164	0.038	1.75E-05	2076
kynurenin	rs12712441	A	G	-0.176	0.041	1.99E-05	2076
kynurenin	rs8099286	A	C	0.17	0.04	2.16E-05	2076
kynurenin	rs2033562	C	G	0.163	0.038	2.16E-05	2076
kynurenin	rs9462016	C	A	-0.454	0.107	2.32E-05	2076
kynurenin	rs699165	G	A	-0.181	0.043	2.37E-05	2076
kynurenin	rs13167723	G	A	-0.255	0.061	2.49E-05	2076
kynurenin	rs11900926	A	C	-0.382	0.091	2.58E-05	2076
kynurenin	rs9880806	C	T	-0.157	0.037	2.68E-05	2076
kynurenin	rs340117	G	A	-0.623	0.149	2.81E-05	2076
kynurenin	rs6896438	G	C	0.163	0.039	2.84E-05	2076
kynurenin	rs1940436	C	T	-0.17	0.041	3.00E-05	2076
kynurenin	rs17592068	C	T	0.315	0.076	3.06E-05	2076
kynurenin	rs17828560	G	A	-0.247	0.059	3.20E-05	2076
kynurenin	rs2414189	C	T	0.961	0.232	3.36E-05	2076
kynurenin	rs9899007	G	T	-0.249	0.06	3.41E-05	2076
kynurenin	rs9371068	G	A	0.153	0.037	3.41E-05	2076
kynurenin	rs6544442	G	A	0.174	0.042	3.42E-05	2076
kynurenin	rs1546290	G	A	0.361	0.088	3.71E-05	2076
kynurenin	rs3923053	G	A	-0.165	0.04	3.72E-05	2076
kynurenin	rs11597005	A	G	0.284	0.069	3.89E-05	2076
kynurenin	rs17135638	G	A	0.479	0.117	3.98E-05	2076
kynurenin	rs6898729	G	A	-0.465	0.113	4.03E-05	2076
kynurenin	rs11228830	G	A	0.307	0.075	4.05E-05	2076
kynurenin	rs7608411	G	A	0.522	0.127	4.30E-05	2076
kynurenin	rs4273102	T	C	-0.312	0.076	4.39E-05	2076
kynurenin	rs7563569	C	A	0.151	0.037	4.43E-05	2076
kynurenin	rs1408879	T	C	0.439	0.108	4.71E-05	2076
kynurenin	rs986974	T	C	0.201	0.049	4.91E-05	2076
kynurenin	rs9548658	G	A	0.247	0.061	4.98E-05	2076
glutamate	rs1859294	G	C	0.215	0.045	1.70E-06	2076
glutamate	rs4524199	C	T	0.204	0.043	1.86E-06	2076
glutamate	rs9518259	A	G	0.177	0.039	4.94E-06	2076
glutamate	rs211215	A	G	0.173	0.038	5.61E-06	2076
glutamate	rs17085064	T	C	0.161	0.036	5.92E-06	2076
glutamate	rs11024326	A	G	-0.265	0.059	7.23E-06	2076
glutamate	rs12000260	T	G	0.222	0.05	7.61E-06	2076
glutamate	rs13165648	A	C	0.24	0.054	8.68E-06	2076
glutamate	rs707123	T	G	-0.159	0.037	1.45E-05	2076
glutamate	rs13195420	G	A	0.267	0.063	2.00E-05	2076
glutamate	rs7705221	A	G	-0.211	0.05	2.50E-05	2076
glutamate	rs1911681	A	T	0.149	0.035	2.58E-05	2076
glutamate	rs13148365	C	T	0.195	0.047	2.99E-05	2076
glutamate	rs4935104	T	C	-0.2	0.048	3.13E-05	2076
glutamate	rs11679311	T	C	0.153	0.037	3.47E-05	2076
glutamate	rs12680447	C	T	-0.292	0.071	3.63E-05	2076
glutamate	rs16854007	C	T	-0.326	0.079	4.02E-05	2076
glutamate	rs9556310	C	T	-0.158	0.039	4.30E-05	2076
glutamate	rs3772295	T	G	-0.169	0.042	4.57E-05	2076
glutamate	rs17650599	T	C	-0.316	0.078	4.64E-05	2076
glutamate	rs1242933	A	G	-0.165	0.041	4.69E-05	2076
glutamate	rs12671572	G	C	-1.528	0.376	4.74E-05	2076
glutamate	rs7921086	A	G	-0.498	0.123	4.88E-05	2076
choline	rs2408564	A	G	-0.249	0.052	1.41E-06	2076
choline	rs9599459	A	T	-1.015	0.216	2.73E-06	2076
choline	rs4008155	C	T	0.215	0.047	4.02E-06	2076
choline	rs12444044	A	G	-0.364	0.08	5.77E-06	2076
choline	rs10819950	A	G	0.208	0.046	6.95E-06	2076
choline	rs10826197	C	A	0.151	0.034	8.15E-06	2076
choline	rs10098425	A	G	0.459	0.103	8.93E-06	2076
choline	rs9314081	G	A	0.528	0.12	1.01E-05	2076
choline	rs10762269	G	A	0.169	0.039	1.18E-05	2076
choline	rs16938029	T	C	0.282	0.066	1.81E-05	2076
choline	rs10338	A	G	0.202	0.047	1.84E-05	2076
choline	rs3733725	G	A	-0.198	0.046	2.01E-05	2076
choline	rs4429580	G	A	0.251	0.059	2.01E-05	2076
choline	rs927811	A	C	-0.165	0.039	2.24E-05	2076
choline	rs11630160	G	A	-0.199	0.047	2.31E-05	2076
choline	rs13398317	T	C	0.203	0.048	2.80E-05	2076
choline	rs1867837	T	C	0.421	0.101	2.88E-05	2076
choline	rs7834685	C	A	0.176	0.042	2.97E-05	2076
choline	rs1868767	A	G	1.844	0.442	3.07E-05	2076
choline	rs785857	G	A	-0.148	0.036	3.22E-05	2076
choline	rs7775235	A	G	0.169	0.041	3.37E-05	2076
choline	rs7850837	T	C	-0.142	0.034	3.56E-05	2076
choline	rs2167267	G	T	0.296	0.072	3.80E-05	2076
choline	rs10758216	G	C	0.141	0.034	4.04E-05	2076
choline	rs2201409	A	G	0.178	0.044	4.32E-05	2076
choline	rs9463493	G	A	-0.158	0.039	4.38E-05	2076
choline	rs6467883	A	G	-0.208	0.051	4.71E-05	2076
choline	rs11242519	G	A	0.21	0.052	4.74E-05	2076
choline	rs16904654	A	T	-0.491	0.121	4.77E-05	2076
carnitine	rs1171617	T	G	-0.418	0.04	5.87E-26	2076
carnitine	rs9879988	A	G	0.239	0.047	3.00E-07	2076
carnitine	rs6959875	G	A	0.27	0.055	7.58E-07	2076
carnitine	rs6108228	T	G	-0.175	0.037	2.56E-06	2076
carnitine	rs274554	C	T	-0.211	0.046	4.68E-06	2076
carnitine	rs11733138	G	A	0.225	0.05	6.10E-06	2076
carnitine	rs562672	T	C	-0.234	0.052	7.39E-06	2076
carnitine	rs4656852	T	C	-0.508	0.114	8.30E-06	2076
carnitine	rs7606454	C	T	0.235	0.053	9.62E-06	2076
carnitine	rs497281	C	A	0.182	0.042	1.23E-05	2076
carnitine	rs9836934	G	T	-0.197	0.045	1.28E-05	2076
carnitine	rs6856402	G	A	-0.147	0.034	1.50E-05	2076
carnitine	rs3807852	G	A	0.172	0.04	1.84E-05	2076
carnitine	rs7203840	C	G	-0.147	0.035	2.17E-05	2076
carnitine	rs731034	T	C	0.198	0.047	2.52E-05	2076
carnitine	rs2053244	T	G	0.146	0.035	2.57E-05	2076
carnitine	rs13400794	T	A	0.183	0.044	2.66E-05	2076
carnitine	rs7406506	G	A	-0.209	0.05	2.95E-05	2076
carnitine	rs6043753	A	G	-0.148	0.036	3.15E-05	2076
carnitine	rs11658572	T	C	0.236	0.057	3.17E-05	2076
carnitine	rs17488979	T	C	1.501	0.361	3.21E-05	2076
carnitine	rs10484239	C	A	0.212	0.051	3.31E-05	2076
carnitine	rs17836364	G	A	-0.734	0.177	3.43E-05	2076
carnitine	rs599951	C	T	-0.175	0.042	3.50E-05	2076
carnitine	rs7076851	A	G	-0.509	0.123	3.51E-05	2076
carnitine	rs2925002	C	T	-0.141	0.034	4.10E-05	2076
carnitine	rs2296148	C	T	0.402	0.098	4.29E-05	2076
carnitine	rs3798408	C	T	0.772	0.19	4.75E-05	2076
carnitine	rs13375160	T	C	0.192	0.047	4.79E-05	2076
betaine	rs6862283	T	C	-0.193	0.036	9.57E-08	2076
betaine	rs11742447	C	T	0.246	0.051	1.16E-06	2076
betaine	rs11224038	C	T	-1.211	0.251	1.40E-06	2076
betaine	rs10817686	T	C	0.456	0.095	1.68E-06	2076
betaine	rs10786317	A	G	-0.158	0.035	4.72E-06	2076
betaine	rs1868264	A	G	0.192	0.042	4.92E-06	2076
betaine	rs2879414	A	G	-0.153	0.033	5.03E-06	2076
betaine	rs10178297	T	C	0.207	0.046	6.74E-06	2076
betaine	rs11030909	C	A	-0.288	0.064	7.30E-06	2076
betaine	rs2087307	T	G	-0.172	0.039	8.63E-06	2076
betaine	rs1328452	G	A	0.217	0.05	1.54E-05	2076
betaine	rs7333859	G	A	0.177	0.041	1.58E-05	2076
betaine	rs17099954	A	G	0.145	0.034	1.61E-05	2076
betaine	rs7449492	G	C	0.157	0.036	1.72E-05	2076
betaine	rs17606892	C	T	0.229	0.053	1.80E-05	2076
betaine	rs6956293	T	C	-0.17	0.04	1.89E-05	2076
betaine	rs8115215	G	C	2.225	0.524	2.15E-05	2076
betaine	rs182165	A	T	-0.171	0.04	2.20E-05	2076
betaine	rs11615707	A	T	-0.216	0.051	2.23E-05	2076
betaine	rs9627239	C	T	-0.214	0.051	2.28E-05	2076
betaine	rs2279534	A	C	0.381	0.09	2.40E-05	2076
betaine	rs298468	G	A	0.227	0.054	2.45E-05	2076
betaine	rs7724650	G	A	0.162	0.038	2.45E-05	2076
betaine	rs17392456	T	C	-0.524	0.124	2.53E-05	2076
betaine	rs1219426	T	C	-0.459	0.11	2.82E-05	2076
betaine	rs7465394	A	G	-0.156	0.037	2.93E-05	2076
betaine	rs10928063	A	G	0.149	0.036	3.01E-05	2076
betaine	rs3948659	A	G	-0.516	0.124	3.07E-05	2076
betaine	rs1923415	G	A	0.219	0.053	3.45E-05	2076
betaine	rs10081	C	T	0.269	0.065	3.93E-05	2076
betaine	rs1909823	T	C	0.432	0.105	3.95E-05	2076
betaine	rs12366073	G	C	0.997	0.243	4.07E-05	2076
betaine	rs12637363	C	T	0.282	0.069	4.10E-05	2076
betaine	rs17351871	G	C	0.398	0.097	4.17E-05	2076
betaine	rs7075837	G	A	0.148	0.036	4.21E-05	2076
betaine	rs7250261	G	C	0.174	0.043	4.40E-05	2076
betaine	rs13006343	C	T	0.28	0.069	4.55E-05	2076
betaine	rs2305457	C	T	-0.16	0.039	4.83E-05	2076
betaine	rs2703825	C	A	0.23	0.057	4.89E-05	2076
betaine	rs358538	A	G	0.456	0.102	7.86E-06	2076
betaine	rs6805982	A	T	-0.317	0.078	4.94E-05	2076
beta_hydroxybutyric acid	rs10496767	T	C	0.2	0.045	6.67E-06	2076
beta_hydroxybutyric acid	rs11676084	G	A	-0.211	0.047	6.77E-06	2076
beta_hydroxybutyric acid	rs12989808	A	G	0.321	0.071	7.33E-06	2076
beta_hydroxybutyric acid	rs17801569	G	A	-0.262	0.059	9.83E-06	2076
beta_hydroxybutyric acid	rs2899666	T	C	0.181	0.041	1.03E-05	2076
beta_hydroxybutyric acid	rs12598965	G	A	-0.165	0.038	1.08E-05	2076
beta_hydroxybutyric acid	rs2504282	A	G	-0.432	0.099	1.19E-05	2076
beta_hydroxybutyric acid	rs7197819	A	G	0.188	0.043	1.29E-05	2076
beta_hydroxybutyric acid	rs4821155	G	C	0.173	0.04	1.29E-05	2076
beta_hydroxybutyric acid	rs12379038	A	G	-0.856	0.197	1.33E-05	2076
beta_hydroxybutyric acid	rs1006553	C	T	0.165	0.038	1.51E-05	2076
beta_hydroxybutyric acid	rs1860192	T	C	-0.195	0.045	1.54E-05	2076
beta_hydroxybutyric acid	rs13111690	C	T	0.291	0.067	1.60E-05	2076
beta_hydroxybutyric acid	rs4841760	A	G	-1.67	0.39	1.83E-05	2076
beta_hydroxybutyric acid	rs16950515	T	G	0.378	0.089	2.07E-05	2076
beta_hydroxybutyric acid	rs4463400	C	T	-0.21	0.05	2.31E-05	2076
beta_hydroxybutyric acid	rs1866771	C	T	0.161	0.038	2.33E-05	2076
beta_hydroxybutyric acid	rs12470874	C	T	0.252	0.06	3.14E-05	2076
beta_hydroxybutyric acid	rs7627359	C	T	-0.202	0.049	3.44E-05	2076
beta_hydroxybutyric acid	rs13391128	A	G	0.232	0.056	3.52E-05	2076
beta_hydroxybutyric acid	rs7912179	C	T	-1.257	0.305	3.88E-05	2076
beta_hydroxybutyric acid	rs2715338	G	C	-0.306	0.075	4.39E-05	2076
beta_hydroxybutyric acid	rs10092729	C	T	-0.206	0.051	4.53E-05	2076
beta_hydroxybutyric acid	rs12832187	C	T	0.239	0.059	4.68E-05	2076
shigella	rs2267739	C	G	0.116	0.024	1.42E-06	18340
shigella	rs73208162	G	A	-0.119	0.025	2.19E-06	18340
shigella	rs1154904	G	A	-0.061	0.013	3.04E-06	18340
shigella	rs113127095	G	A	0.151	0.032	3.33E-06	18340
shigella	rs592299	C	T	-0.059	0.013	4.77E-06	18340
shigella	rs35555519	G	C	0.102	0.022	4.92E-06	18340
shigella	rs113513883	G	A	0.172	0.038	5.28E-06	18340
shigella	rs11706043	A	T	0.076	0.016	5.87E-06	18340
shigella	rs7502686	C	G	-0.136	0.03	5.90E-06	18340
shigella	rs4731451	A	G	-0.061	0.014	7.47E-06	18340
shigella	rs118526	A	C	-0.059	0.014	8.00E-06	18340
shigella	rs112767262	C	T	0.073	0.016	8.21E-06	18340
shigella	rs2798105	G	A	-0.101	0.022	8.25E-06	18340
shigella	rs117092367	T	A	0.117	0.026	9.65E-06	18340
shigella	rs57024273	C	T	0.063	0.014	9.70E-06	18340
shigella	rs76141197	T	C	0.132	0.029	1.02E-05	18340
shigella	rs7549940	G	C	-0.057	0.013	1.06E-05	18340
shigella	rs62248065	G	T	-0.136	0.031	1.17E-05	18340
shigella	rs6092361	G	A	0.06	0.014	1.25E-05	18340
shigella	rs9732427	C	T	-0.064	0.015	1.27E-05	18340
shigella	rs11812909	G	A	0.107	0.025	1.32E-05	18340
shigella	rs1261980	G	A	0.063	0.015	1.34E-05	18340
shigella	rs4704722	A	G	0.061	0.014	1.39E-05	18340
shigella	rs78143293	G	A	-0.08	0.018	1.46E-05	18340
shigella	rs13019074	G	T	0.057	0.013	1.61E-05	18340
shigella	rs12118894	C	G	-0.067	0.015	1.63E-05	18340
shigella	rs726017	G	A	-0.076	0.018	1.93E-05	18340
shigella	rs11071716	G	A	0.08	0.02	1.99E-05	18340
shigella	rs10173353	A	G	-0.058	0.014	2.17E-05	18340
shigella	rs11851356	C	T	0.061	0.014	2.35E-05	18340
shigella	rs922773	T	C	-0.08	0.019	2.42E-05	18340
shigella	rs11178487	G	A	0.055	0.013	2.43E-05	18340
shigella	rs55901970	T	C	0.099	0.023	2.66E-05	18340
shigella	rs2374342	A	C	0.056	0.013	2.76E-05	18340
shigella	rs11669369	G	C	0.09	0.022	2.78E-05	18340
shigella	rs12640250	C	A	0.059	0.014	2.86E-05	18340
shigella	rs10735031	G	A	0.055	0.013	3.06E-05	18340
shigella	rs61973590	G	C	-0.06	0.014	3.18E-05	18340
shigella	rs11893260	C	T	-0.057	0.014	3.34E-05	18340
shigella	rs1229492	C	T	-0.061	0.015	3.40E-05	18340
shigella	rs731131	T	G	0.054	0.013	3.44E-05	18340
shigella	rs17740794	T	C	0.101	0.024	3.66E-05	18340
shigella	rs12628344	C	T	0.081	0.02	3.69E-05	18340
shigella	rs11061247	A	G	0.072	0.017	3.73E-05	18340
shigella	rs11555737	A	G	-0.073	0.018	3.83E-05	18340
shigella	rs7840412	G	A	0.058	0.014	3.97E-05	18340
shigella	rs12624446	A	T	0.068	0.016	4.03E-05	18340
shigella	rs13011007	A	G	0.071	0.017	4.03E-05	18340
shigella	rs74608082	C	T	0.131	0.033	4.07E-05	18340
shigella	rs10137456	T	C	-0.076	0.019	4.10E-05	18340
shigella	rs7761045	T	A	0.073	0.017	4.13E-05	18340
shigella	rs72873982	C	T	0.081	0.02	4.33E-05	18340
shigella	rs569786	C	T	-0.057	0.014	4.36E-05	18340
shigella	rs111229068	T	A	0.102	0.026	4.43E-05	18340
shigella	rs142912232	A	G	-0.196	0.048	4.64E-05	18340
shigella	rs10163905	G	A	-0.054	0.013	4.73E-05	18340
shigella	rs1952010	T	C	-0.064	0.016	4.75E-05	18340
shigella	rs4939773	T	C	-0.054	0.013	4.81E-05	18340
shigella	rs1384204	A	T	-0.063	0.016	4.94E-05	18340
shigella	rs11122169	G	C	-0.208	0.05	3.61E-05	18340
shigella	rs8110533	G	T	-0.542	0.131	3.65E-05	18340
shigella	rs10149171	G	A	0.238	0.058	3.67E-05	18340
shigella	rs12116428	C	T	-0.484	0.117	3.73E-05	18340
shigella	rs1286841	G	A	-0.203	0.049	3.75E-05	18340
shigella	rs17811040	G	A	-0.154	0.037	3.77E-05	18340
shigella	rs10104412	A	T	0.206	0.05	3.83E-05	18340
shigella	rs8090864	A	G	-0.562	0.136	3.83E-05	18340
shigella	rs13234547	G	A	0.54	0.131	3.85E-05	18340
shigella	rs11583422	G	C	0.537	0.13	3.88E-05	18340
shigella	rs7971284	A	G	0.234	0.057	4.01E-05	18340
shigella	rs533017	T	C	0.149	0.036	4.01E-05	18340
shigella	rs10003933	A	T	-0.211	0.051	4.02E-05	18340
shigella	rs12443031	C	T	3.036	0.74	4.05E-05	18340
shigella	rs1003093	A	C	-0.209	0.051	4.08E-05	18340
shigella	rs7522157	C	T	0.151	0.037	4.11E-05	18340
shigella	rs628884	T	A	-0.251	0.061	4.13E-05	18340
shigella	rs17526983	G	A	0.467	0.114	4.14E-05	18340
shigella	rs2001146	T	C	0.3	0.073	4.16E-05	18340
shigella	rs4324493	A	G	-0.147	0.036	4.19E-05	18340
shigella	rs7677410	T	C	0.204	0.05	4.19E-05	18340
shigella	rs6974263	A	C	-0.139	0.034	4.27E-05	18340
shigella	rs1538291	C	T	0.183	0.045	4.27E-05	18340
shigella	rs385264	T	A	0.278	0.068	4.30E-05	18340
shigella	rs6656519	T	G	0.182	0.044	4.36E-05	18340
shigella	rs8041209	G	T	-0.271	0.066	4.49E-05	18340
shigella	rs200258	T	C	1.006	0.247	4.61E-05	18340
shigella	rs2968822	C	T	-0.143	0.035	4.71E-05	18340
shigella	rs2415847	G	A	-0.168	0.041	4.83E-05	18340
shigella	rs10870302	G	T	-0.14	0.035	4.96E-05	18340
shigella	rs10877835	C	A	-0.225	0.056	4.96E-05	18340
