# Supplementary figures and images for: The Effects of Specific Gut Microbiota and Metabolites on IgA Nephropathy—Based on Mendelian Randomization and Clinical Validation
Source: MDPI journal article supplement (doi:10.3390/nu15102407), 2023-05-22

# MR Test

- Inverse variance weighted
- MR Egger
- Weighted median

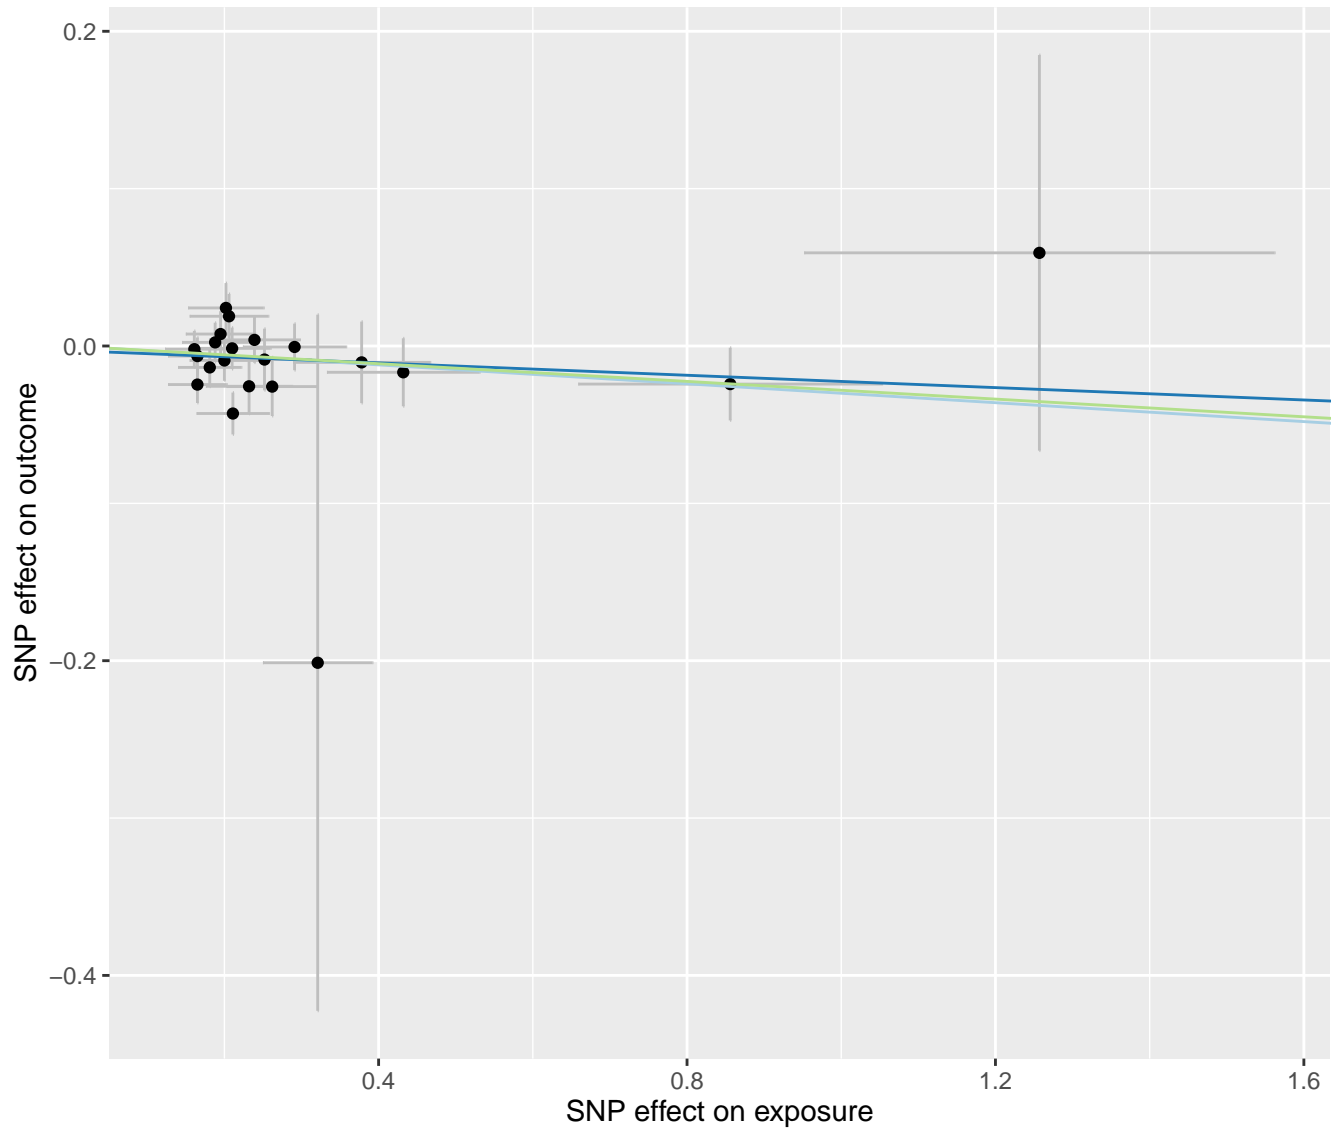

Supplement: s1 [file s1]

# MR Method

- Inverse variance weighted
- MR Egger

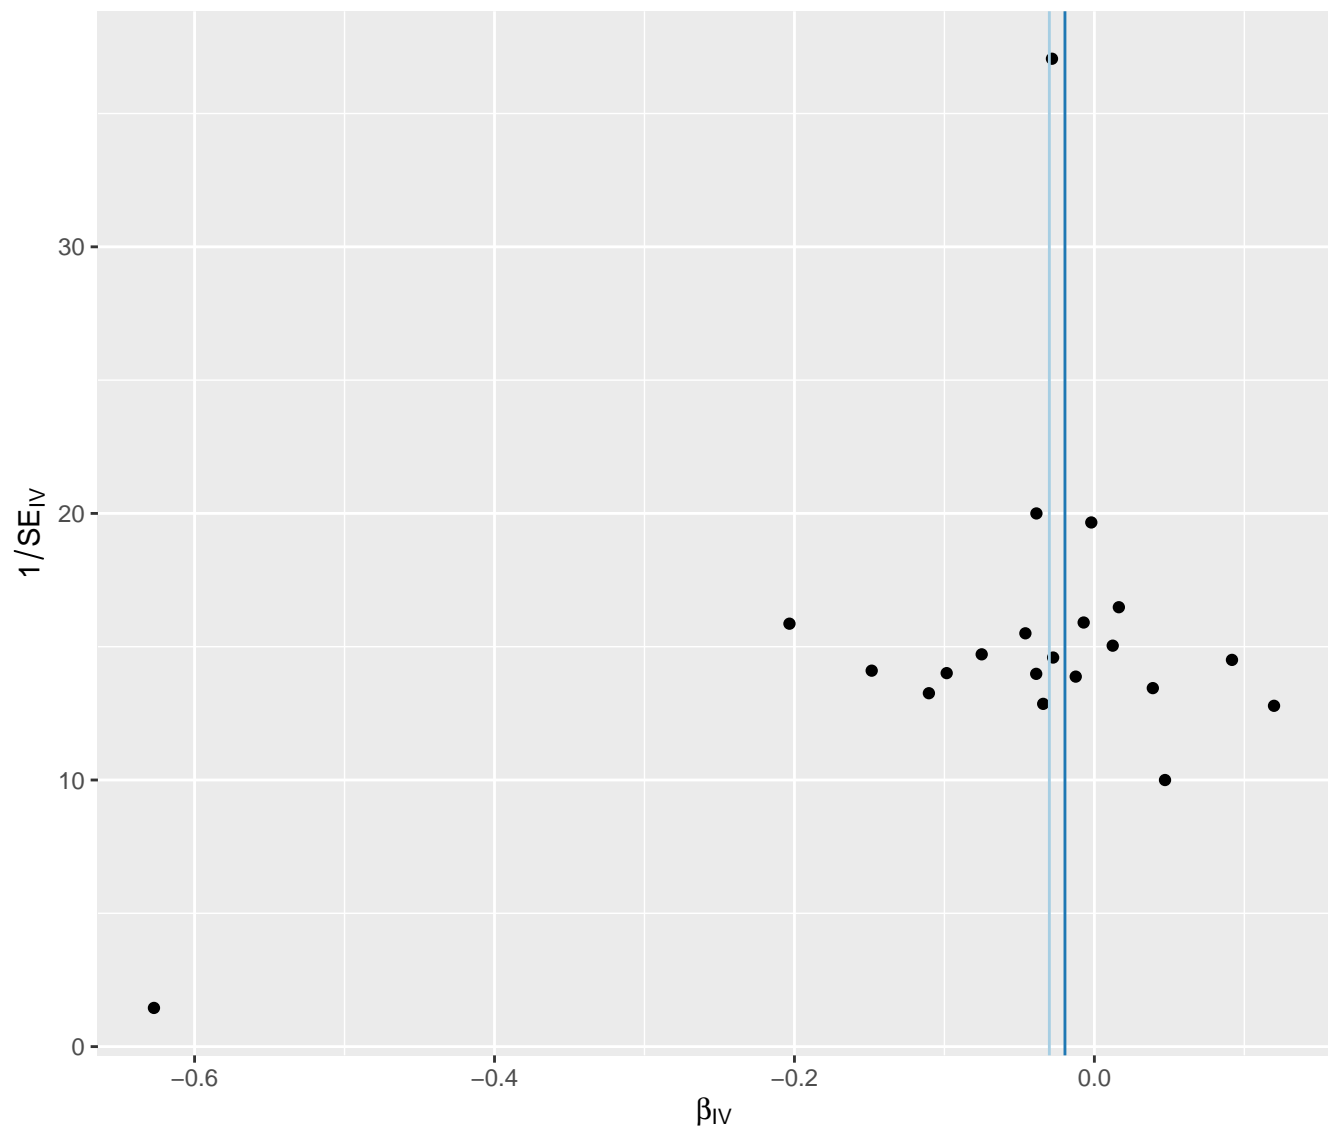

Supplement: s1 [file s1]

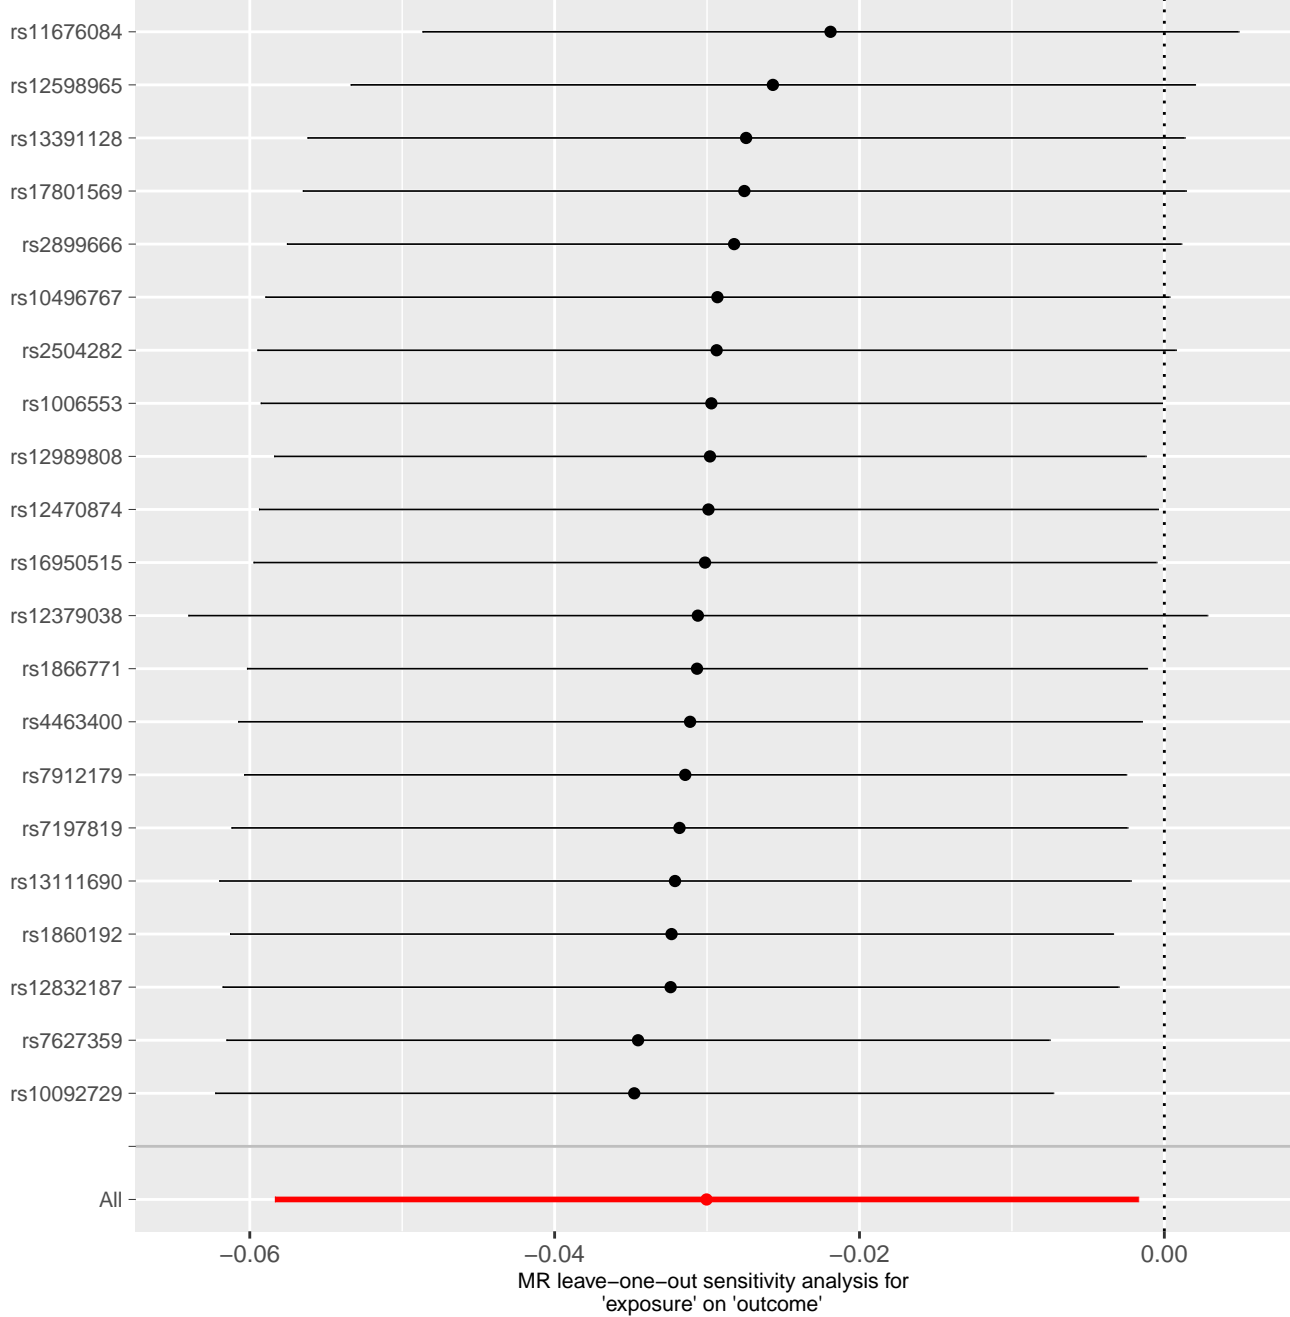

Supplement: s1 [file s1]
